# Supplementary material for: Mechanistic insights into the rhodium–copper cascade catalyzed dual C–H annulation of indoles
Source: Royal Society of Chemistry journal article supplement (doi:10.1039/d0qo01332c), 2020-12-10
Supplement: d0qo01332c1.pdf [file d0qo01332c1.pdf]

# Supporting Information

## Mechanistic insights into the rhodium-copper cascade catalyzed dual C-H annulation of indoles

Xiaoqian He,<sup>a</sup> Lei Zhu,<sup>a</sup> Dan Heng,<sup>a</sup> Fenru Liu,<sup>a</sup> Shihan Liu,<sup>a</sup> Kangbao Zhong,<sup>a</sup>

Chunhui Shan,<sup>\*c</sup> Ruopeng Bai,<sup>\*a</sup> Yu Lan <sup>\*ab</sup>

<sup>a</sup> School of Chemistry and Chemical Engineering, Chongqing Key Laboratory of Theoretical and Computational Chemistry, Chongqing University, Chongqing 400030

<sup>b</sup> College of Chemistry and Institute of Green Catalysis, Zhengzhou University, Zhengzhou 450001

<sup>c</sup> College of Chemistry, Chongqing Normal University, Chongqing 401331

*chunhui.shan@cqu.edu.cn*

*ruopeng@cqu.edu.cn*

*lanyu@cqu.edu.cn*

## Table of Content

|                                                                                                                                             |           |
|---------------------------------------------------------------------------------------------------------------------------------------------|-----------|
| <b>1. Complete reference for Gaussian 09 .....</b>                                                                                          | <b>2</b>  |
| <b>2. B3-LYP and M06 calculated absolute energies, enthalpies, and free energies of all structures .....</b>                                | <b>3</b>  |
| <b>3. M06/6-311+G(d,p)//B3-LYP-D3/6-31G(d) calculated absolute energies, enthalpies, and free energies of the selected structures. ....</b> | <b>4</b>  |
| <b>4. M06/6-311+G(d,p)//B3-LYP/6-31+G(d) calculated absolute energies, enthalpies, and free energies of the selected structures. ....</b>   | <b>5</b>  |
| <b>5. Calculated energy profiles of key intermediates with and without dispersion corrections. .</b>                                        | <b>5</b>  |
| <b>6. Calculated energy profiles of key intermediates with and without diffuse functions. ....</b>                                          | <b>6</b>  |
| <b>7. CuCl<sub>2</sub>-Catalyzed reaction to synthesize <math>\alpha</math>-chloro carboxylate .....</b>                                    | <b>7</b>  |
| <b>8. Comparison of Rhodium-catalysis to synthesize rhodium enolate .....</b>                                                               | <b>8</b>  |
| <b>9. B3LYP/6-31G(d) geometries for all the optimized compounds and transition states .....</b>                                             | <b>9</b>  |
| <b>10. B3-LYP-D3/6-31G(d) geometries for selected the optimized compounds and transition states .....</b>                                   | <b>46</b> |
| <b>11. B3-LYP/6-31+G(d) geometries for selected the optimized compounds and transition states .....</b>                                     | <b>56</b> |

### 1. Complete reference for Gaussian 09

Frisch, M. J.; Trucks, G. W.; Schlegel, H. B.; Scuseria, G. E.; Robb, M. A.; Cheeseman, J. R.; Scalmani, G.; Barone, V.; Mennucci, B.; Petersson, G. A.; Nakatsuji, H.; Caricato, M.; Li, X.; Hratchian, H. P.; Izmaylov, A. F.; Bloino, J.; Zheng, G.; Sonnenberg, J. L.; Hada, M.; Ehara, M.; Toyota, K.; Fukuda, R.; Hasegawa, J.; Ishida, M.; Nakajima, T.; Honda, Y.; Kitao, O.; Nakai, H.; Vreven, T.; Montgomery, Jr., J. A.; Peralta, J. E.; Ogliaro, F.; Bearpark, M.; Heyd, J. J.; Brothers, E.; Kudin, K. N.; Staroverov, V. N.; Keith, T.; Kobayashi, R.; Normand, J.; Raghavachari, K.; Rendell, A.; Burant, J. C.; Iyengar, S. S.; Tomasi, J.; Cossi, M.; Rega, N.; Millam, J. M.; Klene, M.; Knox, J. E.; Cross, J. B.; Bakken, V.; Adamo, C.; Jaramillo, J.; Gomperts, R.; Stratmann, R. E.; Yazyev, O.; Austin, A. J.; Cammi, R.; Pomelli, C.; Ochterski, J. W.; Martin, R. L.; Morokuma, K.; Zakrzewski, V. G.; Voth, G. A.; Salvador, P.; Dannenberg, J. J.; Dapprich, S.; Daniels, A. D.; Farkas, O.; Foresman, J. B.; Ortiz, J. V.; Cioslowski,

J.; and Fox, D. J. Gaussian 09, revision D.01; Gaussian, Inc.: Wallingford, CT, 2013.

**2. M06/6-311+G(d,p)//B3-LYP/6-31G(d) calculated absolute energies, enthalpies, and free energies of all structures.**

**Table S1.** M06/6-311+G(d,p)//B3-LYP/6-31G(d) calculated absolute energies, enthalpies, and free energies of all structures.

| Geometry                                        | $E_{\text{(elec-B3-LYP)}}^1$ | $H_{\text{(corr-B3-LYP)}}^2$ | $G_{\text{(corr-B3-LYP)}}^3$ | $E_{\text{(solv-M06)}}^4$ | IF <sup>5</sup> |
|-------------------------------------------------|------------------------------|------------------------------|------------------------------|---------------------------|-----------------|
| 1                                               | -1135.276114                 | 0.231306                     | 0.162496                     | -1134.960514              | -               |
| 2                                               | -607.670323                  | 0.171365                     | 0.119353                     | -607.449788               | -               |
| 3                                               | -1742.959804                 | 0.407271                     | 0.299815                     | -1742.431404              | -               |
| 4-ts                                            | -1742.939872                 | 0.404732                     | 0.298651                     | -1742.410370              | -431.63         |
| N <sub>2</sub>                                  | -109.520718                  | 0.008905                     | -0.012849                    | -109.485155               | -               |
| 5                                               | -1633.449004                 | 0.391578                     | 0.299064                     | -1632.948210              | -               |
| 6                                               | -403.120833                  | 0.166988                     | 0.125005                     | -402.926096               | -               |
| 7-ts                                            | -2036.557074                 | 0.563888                     | 0.446333                     | -2035.878676              | -232.86         |
| 8                                               | -2036.572484                 | 0.565201                     | 0.445182                     | -2035.900498              | -               |
| 9-ts                                            | -2036.541035                 | 0.559494                     | 0.442144                     | -2035.871866              | -1262.75        |
| 10                                              | -2036.561216                 | 0.563091                     | 0.449132                     | -2035.893160              | -               |
| 11-ts                                           | -2036.558841                 | 0.562692                     | 0.446366                     | -2035.878425              | -253.36         |
| 12                                              | -2036.607925                 | 0.564756                     | 0.444047                     | -2035.919120              | -               |
| 13-ts                                           | -2036.561487                 | 0.558837                     | 0.440755                     | -2035.876394              | -1211.47        |
| 14                                              | -2036.569739                 | 0.563118                     | 0.445231                     | -2035.887672              | -               |
| 15                                              | -650.836051                  | 0.201300                     | 0.145533                     | -650.604052               | -               |
| CH <sub>3</sub> COOH                            | -229.077610                  | 0.067547                     | 0.034687                     | -229.039420               | -               |
| 16                                              | -2458.337287                 | 0.698098                     | 0.555157                     | -2457.463151              | -               |
| 17-threo-ts                                     | -2458.309372                 | 0.698104                     | 0.561935                     | -2457.445592              | -164.49         |
| 18-threo                                        | -2458.339038                 | 0.701150                     | 0.565217                     | -2457.483800              | -               |
| 19-threo-ts                                     | -2687.407437                 | 0.765156                     | 0.616765                     | -2686.505962              | -1073.02        |
| 20-threo                                        | -1552.167435                 | 0.534936                     | 0.436138                     | -1551.578261              | -               |
| 21-erythro-ts                                   | -2458.308044                 | 0.698349                     | 0.563149                     | -2457.440266              | -110.87         |
| 22-erythro                                      | -2458.336797                 | 0.701195                     | 0.565126                     | -2457.481036              | -               |
| 23-erythro-ts                                   | -2687.408978                 | 0.764982                     | 0.615149                     | -2686.508678              | -1350.41        |
| 24-erythro                                      | -1552.173402                 | 0.534978                     | 0.435157                     | -1551.582195              | -               |
| 25                                              | -1733.265317                 | 0.266291                     | 0.187881                     | -1733.100685              | -               |
| C <sub>2</sub> H <sub>5</sub> OOCH <sub>3</sub> | -307.702009                  | 0.127201                     | 0.086631                     | -307.609674               | -               |
| 26                                              | -2977.735876                 | 0.673622                     | 0.536528                     | -2977.071030              | -               |
| 27-ts                                           | -2977.713449                 | 0.666747                     | 0.531262                     | -2977.045465              | -478.57         |
| HCl                                             | -460.792269                  | 0.009976                     | -0.011222                    | -460.797594               | -               |
| 28                                              | -2516.898539                 | 0.657536                     | 0.523091                     | -2516.229526              | -               |
| 29-ts                                           | -2516.883702                 | 0.656370                     | 0.526005                     | -2516.228983              | -91.87          |
| 30                                              | -2516.889605                 | 0.657466                     | 0.524869                     | -2516.238278              | -               |
| O <sub>2</sub>                                  | -150.254027                  | 0.007046                     | -0.015204                    | -150.298004               | -               |

|                               |              |          |          |              |   |
|-------------------------------|--------------|----------|----------|--------------|---|
| H <sub>2</sub> O <sub>2</sub> | -151.528502  | 0.029481 | 0.003487 | -151.530620  | - |
| 31                            | -1550.981342 | 0.512054 | 0.414747 | -1550.386121 | - |

<sup>1</sup>The electronic energy calculated by B3-LYP in gas phase. <sup>2</sup>The thermal correction to enthalpy calculated by B3-LYP in gas phase. <sup>3</sup>The thermal correction to Gibbs free energy calculated by B3-LYP in gas phase. <sup>4</sup>The electronic energy calculated by M06 in chloroform solvent. <sup>5</sup>The B3-LYP calculated imaginary frequencies for the transition states.

### 3. M06/6-311+G(d,p)//B3-LYP-D3/6-31G(d) calculated absolute energies, enthalpies, and free energies of the selected structures.

**Table S2.** M06/6-311+G(d,p)//B3-LYP-D3/6-31G(d) calculated absolute energies, enthalpies, and free energies of the selected structures.

| Geometry             | E <sub>(elec-B3-LYP-D3)</sub> <sup>1</sup> | H <sub>(corr-B3-LYP-D3)</sub> <sup>2</sup> | G <sub>(corr-B3-LYP-D3)</sub> <sup>3</sup> | E <sub>(solv-M06)</sub> <sup>4</sup> | IF <sup>5</sup> |
|----------------------|--------------------------------------------|--------------------------------------------|--------------------------------------------|--------------------------------------|-----------------|
| 1                    | -1135.309648                               | 0.231315                                   | 0.163029                                   | -1134.961078                         | -               |
| 2                    | -607.686878                                | 0.171402                                   | 0.119381                                   | -607.449798                          | -               |
| N <sub>2</sub>       | -109.520719                                | 0.008905                                   | -0.012849                                  | -109.485155                          | -               |
| 6                    | -403.133315                                | 0.167006                                   | 0.124743                                   | -402.926118                          | -               |
| 14                   | -2036.669423                               | 0.564751                                   | 0.446959                                   | -2035.887606                         | -               |
| 15                   | -650.853629                                | 0.201394                                   | 0.145758                                   | -650.604014                          | -               |
| CH <sub>3</sub> COOH | -229.080609                                | 0.067538                                   | 0.034785                                   | -229.039416                          | -               |
| 16                   | -2458.458398                               | 0.699348                                   | 0.559444                                   | -2457.464429                         | -               |
| 17-threo-ts          | -2458.443100                               | 0.698794                                   | 0.565632                                   | -2457.448352                         | -127.39         |
| 18-threo             | -2458.471298                               | 0.702327                                   | 0.569470                                   | -2457.485733                         | -               |
| 21-erythro-ts        | -2458.445013                               | 0.700066                                   | 0.569227                                   | -2457.445565                         | -104.74         |
| 22-erythro           | -2458.468366                               | 0.702070                                   | 0.567733                                   | -2457.483156                         | -               |

<sup>1</sup>The electronic energy calculated by B3-LYP-D3 in gas phase. <sup>2</sup>The thermal correction to enthalpy calculated by B3-LYP-D3 in gas phase. <sup>3</sup>The thermal correction to Gibbs free energy calculated by B3-LYP-D3 in gas phase. <sup>4</sup>The electronic energy calculated by M06 in chloroform solvent. <sup>5</sup>The B3-LYP-D3 calculated imaginary frequencies for the transition states.

### 4. M06/6-311+G(d,p)//B3-LYP/6-31+G(d) calculated absolute energies, enthalpies, and free energies of the selected structures.

**Table S3.** M06/6-311+G(d,p)//B3-LYP/6-31+G(d) calculated absolute energies, enthalpies, and free energies of the selected structures.

| Geometry       | E <sub>(elec-B3-LYP/6-31+G(d))</sub> <sup>1</sup> | H <sub>(corr-B3-LYP/6-31+G(d))</sub> <sup>2</sup> | G <sub>(corr-B3-LYP/6-31+G(d))</sub> <sup>3</sup> | E <sub>(solv-M06)</sub> <sup>4</sup> | IF <sup>5</sup> |
|----------------|---------------------------------------------------|---------------------------------------------------|---------------------------------------------------|--------------------------------------|-----------------|
| 1              | -1135.293056                                      | 0.231646                                          | 0.159349                                          | -1134.961125                         | -               |
| 2              | -607.694383                                       | 0.170979                                          | 0.118970                                          | -607.449519                          | -               |
| N <sub>2</sub> | -109.527021                                       | 0.008896                                          | -0.012858                                         | -109.485166                          | -               |

|                      |              |          |          |              |         |
|----------------------|--------------|----------|----------|--------------|---------|
| 6                    | -403.136332  | 0.166721 | 0.124968 | -402.925887  | -       |
| 14                   | -2036.6155   | 0.563006 | 0.441885 | -2035.886898 | -       |
| 15                   | -650.863433  | 0.200857 | 0.144940 | -650.603704  | -       |
| CH <sub>3</sub> COOH | -229.092588  | 0.067279 | 0.034309 | -229.039374  | -       |
| 16                   | -2458.396973 | 0.697021 | 0.553285 | -2457.461868 | -       |
| 17-threo-ts          | -2458.368220 | 0.696612 | 0.559114 | -2457.444800 | -164.70 |
| 18-threo             | -2458.396867 | 0.699730 | 0.562174 | -2457.482886 | -       |
| 21-erythro-ts        | -2458.366421 | 0.696833 | 0.561023 | -2457.439062 | -114.77 |
| 22-erythro           | -2458.395027 | 0.699745 | 0.563717 | -2457.480117 | -       |

<sup>1</sup>The electronic energy calculated by B3-LYP/6-31+G(d) in gas phase. <sup>2</sup>The thermal correction to enthalpy calculated by B3-LYP/6-31+G(d) in gas phase. <sup>3</sup>The thermal correction to Gibbs free energy calculated by B3-LYP/6-31+G(d) in gas phase. <sup>4</sup>The electronic energy calculated by M06 in chloroform solvent. <sup>5</sup>The B3-LYP/6-31+G(d) calculated imaginary frequencies for the transition states.

## 5. Calculated energy profiles of key intermediates with and without dispersion corrections.

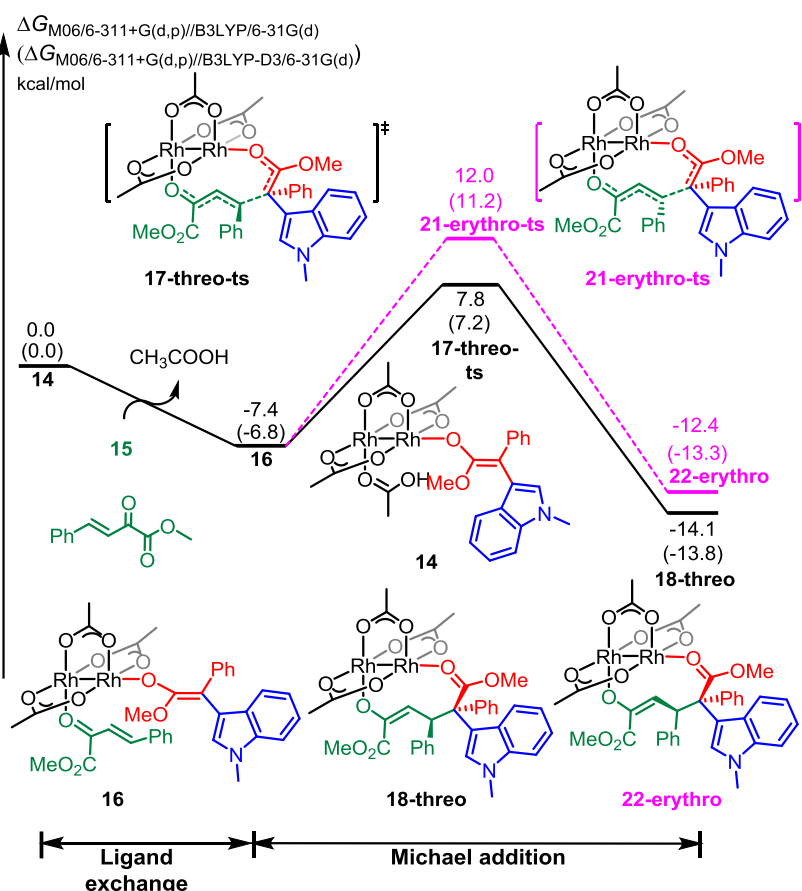

**Figure S1.** Gibbs free energy profiles for the Michael-type addition process in the Rh<sub>2</sub>(OAc)<sub>4</sub>-catalyzed reaction. The values given by kcal/mol are the relative free energies calculated by M06/6-311+G(d,p)//B3-LYP/6-31G(d) method in ethylacetate solvent. The values in parentheses are the free energies given by M06/6-311+G(d,p)//B3-LYP-D3/6-31G(d) method.

## 6. Calculated energy profiles of key intermediates with and without diffuse functions.

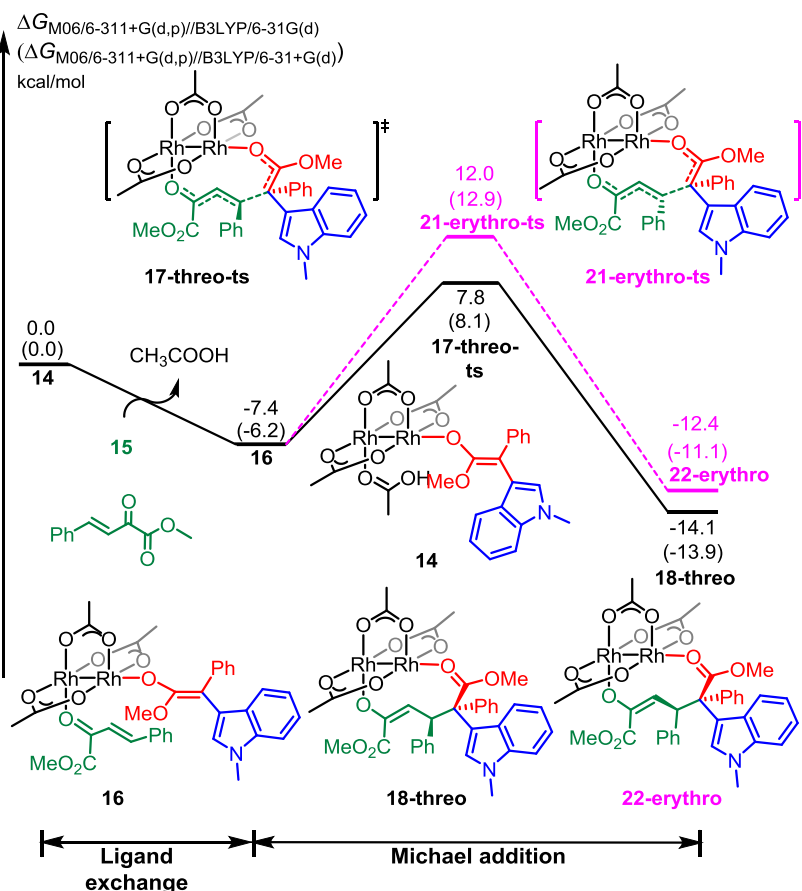

**Figure S2.** Gibbs free energy profiles for the Michael-type addition process in the  $\text{Rh}_2(\text{OAc})_4$ -catalyzed reaction. The values given by kcal/mol are the relative free energies calculated by M06/6-311+G(d,p)//B3-LYP/6-31G(d) method in ethylacetate solvent. The values in parentheses are the free energies given by M06/6-311+G(d,p)//B3-LYP/6-31+G(d) method.

## 7. Energy profiles of $\text{CuCl}_2$ -Catalyzed reaction to synthesize $\alpha$ -chloro carboxylate.

When copper(II) enolate intermediate **28** forms, ligand exchange between intermediate **28** and copper(II) chloride **25** then takes place with concomitant generation of a triplet cationic intermediate **32-Triplet**. An accurate structure of the crossing point is located as the minimum energy crossing point **MECP<sub>32-33</sub>**.<sup>1-2</sup> The CYLview structure shown in Figure S1 suggests that the Cu1–Cl2, Cu2–Cl2 bonds distance in **MECP<sub>32-33</sub>** is 2.15 Å and 3.24 Å. Through this structure, the singlet

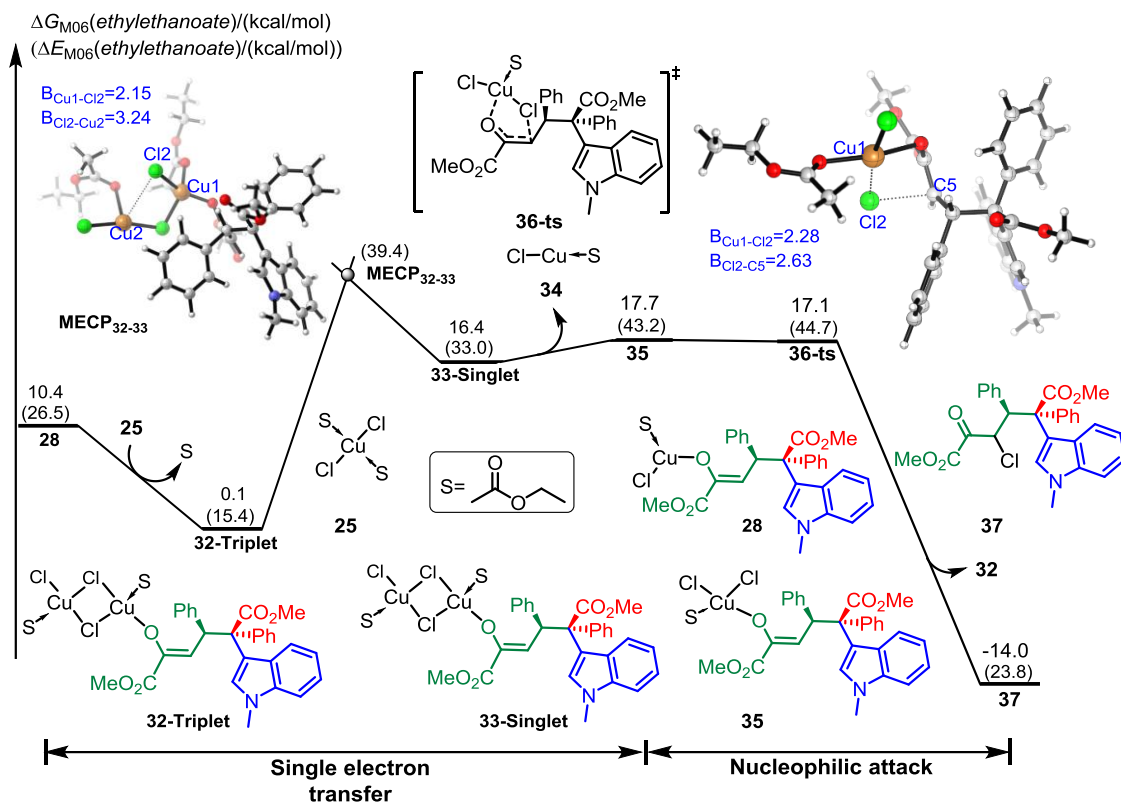

**Figure S3.** Gibbs energy profiles for the copper salt mediated  $\alpha$ -chlorocarboxylate synthesis. The values given by kcal/mol are the relative free energies calculated by M06/6-311+G(d,p)//B3-LYP/6-31G(d) method in ethylacetate solvent. The values in parentheses are the electronic energies given by M06/6-311+G(d,p)//B3-LYP/6-31G(d) method.

intermediate **33-Singlet** can be generated from triplet intermediate **32-Triplet**; and the energy span is 24.0 kcal/mol. Subsequent dissociation of copper(I) chloride **34** on the singlet potential energy surface afford copper(III) enolate intermediate **35**. The calculated free energy barrier of this step is 6.1 kcal/mol. Then, nucleophilic attack by coordinated chloride occurs via transition state **36-ts** to yield  $\alpha$ -chlorocarboxylate **37**. In the optimized geometry of transition state **36-ts** (Figure S3), the Cu1-Cl2 and Cl2-C5 bond lengths are 2.28 and 2.63 Å, respectively. Comparing with the pathway in Figure. 4, this results suggest that this results suggest that generation of singlet Cu(III) enolate via MECP is unfavorable, and intramolecular radical-type addition to the indole moiety can occur to give fused cyclic intermediate **30** in the presence of copper enolate **28**.

## References:

1. Koga, K. Morokuma, Determination of the lowest energy point on the crossing seam between two potential surfaces using the energy gradient, *Chem. Phys. Lett.* 1985, **119**, 371–374.
2. M. Lundberg, P. E. M. Siegbahn, Minimum energy spin crossings for an O–O bond formation reaction, *Chem. Phys. Lett.* 2005, **401**, 347–351.

## 8. Energy profiles of rhodium-catalyzed rhodium enolate generation.

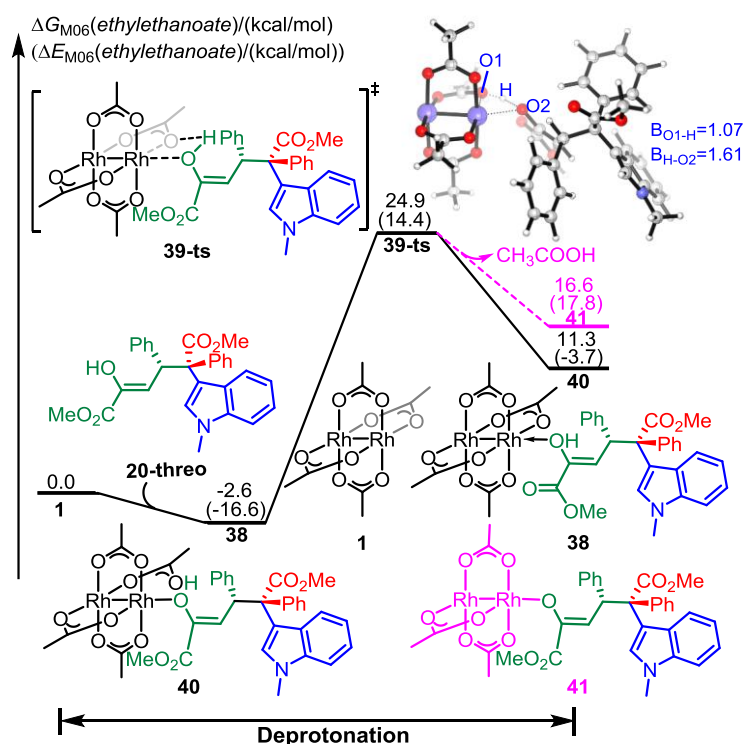

**Figure S4.** Gibbs energy profiles of the rhodium-catalyzed rhodium enolate generation. The values given by kcal/mol are the relative free energies calculated by M06/6-311+G(d,p)//B3-LYP/6-31G(d) method in ethylacetate solvent. The values in parentheses are the electronic energies given by M06/6-311+G(d,p)//B3-LYP/6-31G(d) method.

The calculated free-energy profiles of rhodium enolate generation are shown in Figure S4. The dirhodium complex **1** is set to zero energy for the free-energy profile. Coordination of  $\alpha$ -oxo carboxylate **20-threo** to rhodium center results in the formation of intermediate **38** with a Gibbs free energy decrease of 2.6 kcal/mol. Then deprotonation by coordinated oxygen occurs via transition state **39-ts** with an energy



barrier of 27.5 kcal/mol to afford rhodium enolate **40**. The geometric structure shows that the length of the O1-H bond being formed in transition state **39-ts** is 1.07 Å and the O2-H bond being broken is 1.61 Å. Generation of an alternative rhodium enolate **41** with a dissociation of an acetic acid is also calculated, and its relative free energy is 5.3 kcal/mol higher than **40**. The calculated results show that rhodium mediated deprotonation of  $\alpha$ -oxo carboxylate is unfavorable compared with the copper mediated deprotonation pathway (Figure 4).

### 9. B3LYP/6-31G(d) geometries for all the optimized compounds and transition states.

|          |             |             |             |          |             |             |             |
|----------|-------------|-------------|-------------|----------|-------------|-------------|-------------|
| <b>1</b> |             |             |             |          |             |             |             |
| Rh       | -0.00276000 | 0.00121500  | 1.19392300  | H        | -3.83779500 | -2.52386900 | 0.58044400  |
| Rh       | 0.00330300  | 0.00111900  | -1.19393500 | H        | -3.29659600 | -3.11951500 | -1.01935900 |
| C        | 1.90042300  | 1.83138000  | 0.00839200  | <b>2</b> |             |             |             |
| O        | 1.47806300  | 1.42769700  | 1.14098600  | C        | -0.50061500 | 0.40184600  | 0.00018600  |
| O        | 1.48386000  | 1.42835500  | -1.12733500 | N        | -0.84919600 | 1.67299300  | 0.00023600  |
| C        | -1.83072400 | 1.90060800  | -0.00822900 | N        | -1.12119500 | 2.77829300  | 0.00067000  |
| O        | -1.42925100 | 1.48253200  | 1.12746600  | C        | 0.94296800  | 0.07881200  | 0.00007300  |
| O        | -1.42346700 | 1.48169400  | -1.14085300 | C        | 1.38753800  | 1.25608400  | 0.00040900  |
| C        | -1.89949800 | -1.82969800 | -0.00832900 | C        | 1.90470600  | 1.10722800  | -0.00038900 |
| O        | -1.48427500 | -1.42527200 | 1.12735800  | C        | 2.75308200  | -1.53950900 | 0.00028500  |
| O        | -1.47735200 | -1.42579700 | -1.14094900 | H        | 0.66227500  | -2.05850300 | 0.00073000  |
| C        | 1.83044700  | -1.89922600 | 0.00829400  | C        | 3.26520300  | 0.81146000  | -0.00048800 |
| O        | 1.43079100  | -1.47941800 | -1.12739400 | H        | 1.59531900  | 2.14884300  | -0.00071700 |
| O        | 1.42387000  | -1.47965500 | 1.14091500  | C        | 3.70023300  | -0.51519900 | -0.00014500 |
| C        | -2.88598900 | 2.98170500  | -0.00183000 | H        | 3.07437600  | -2.57783400 | 0.00055300  |
| C        | -2.98313600 | -2.88238900 | -0.00176500 | H        | 3.98605800  | 1.62469000  | -0.00085800 |
| C        | 2.99225500  | 2.87553700  | 0.00177200  | H        | 4.76188800  | -0.74546000 | -0.00022000 |
| C        | 2.87270000  | -2.99290400 | 0.00175300  | C        | -1.62138800 | -0.55102600 | -0.00007400 |
| H        | -3.79860500 | 2.59363800  | 0.46292200  | O        | -1.51727900 | -1.76305100 | 0.00015700  |
| H        | -2.54272200 | 3.82522800  | 0.60501600  | O        | -2.81575000 | 0.09392800  | -0.00051300 |
| H        | -3.10365700 | 3.31403300  | -1.01779700 | C        | -3.97071700 | -0.75873600 | -0.00025000 |
| H        | 3.87810500  | 2.47093300  | -0.49884400 | H        | -4.82725600 | -0.08408000 | 0.00215800  |
| H        | 2.66119000  | 3.74660900  | -0.57243100 | H        | -3.98222600 | -1.39162100 | -0.89158200 |
| H        | 3.24692700  | 3.17367500  | 1.01972100  | H        | -3.97952800 | -1.39480600 | 0.88881000  |
| H        | 2.46174100  | -3.88198700 | -0.48800800 | <b>3</b> |             |             |             |
| H        | 3.73955600  | -2.66876100 | -0.58254600 | Rh       | 2.25397100  | -0.96995900 | 0.32345400  |
| H        | 3.17840700  | -3.24035800 | 1.01924400  | Rh       | 0.14131900  | 0.11849200  | -0.10275300 |
| H        | -2.60777000 | -3.78581300 | 0.49027500  | C        | 2.28493000  | 0.86973200  | -1.92117700 |

|   |             |             |             |             |             |             |             |
|---|-------------|-------------|-------------|-------------|-------------|-------------|-------------|
| O | 3.03842300  | 0.08115400  | -1.26995400 | C           | -1.05459000 | 4.57174800  | 0.19404500  |
| O | 1.05084700  | 1.09280300  | -1.68240600 | H           | -0.61590300 | 5.23149700  | -0.55462000 |
| C | 1.90086500  | 1.52945500  | 1.74137800  | H           | -1.95335500 | 5.02000300  | 0.62457700  |
| O | 2.73256500  | 0.57954300  | 1.59360500  | H           | -0.33606800 | 4.35187700  | 0.98625200  |
| O | 0.76240300  | 1.62395800  | 1.17474700  | <b>4-ts</b> |             |             |             |
| C | 0.14420700  | -1.73046800 | 2.14532000  | Rh          | -2.41400600 | -0.66838900 | -0.27721100 |
| O | 1.36884000  | -1.96626800 | 1.88852400  | Rh          | -0.10199200 | 0.06678600  | 0.05807000  |
| O | -0.61402300 | -0.93227700 | 1.50477900  | C           | -2.10812600 | 1.57188000  | 1.54989700  |
| C | 0.53069100  | -2.39088300 | -1.52255500 | O           | -2.99066800 | 0.82841100  | 1.02561100  |
| O | -0.31539700 | -1.44736600 | -1.37193200 | O           | -0.84612600 | 1.49484800  | 1.36129600  |
| O | 1.66852000  | -2.46741500 | -0.96219800 | C           | -1.53124700 | 1.36318600  | -2.13656200 |
| C | 2.30542900  | 2.66820900  | 2.65109700  | O           | -2.54251400 | 0.65187800  | -1.85104900 |
| C | -0.46219100 | -2.43686800 | 3.33643000  | O           | -0.41072800 | 1.36215800  | -1.52560900 |
| C | 2.89839000  | 1.63045900  | -3.07525700 | C           | -0.45924400 | -2.17790000 | -1.78394200 |
| C | 0.12828500  | -3.51681500 | -2.44820800 | O           | -1.70802300 | -2.11334700 | -1.56539500 |
| H | 3.09085500  | 2.34655300  | 3.33745900  | O           | 0.43898100  | -1.43620500 | -1.26136400 |
| H | 2.69217200  | 3.49337900  | 2.04122500  | C           | -1.05513200 | -1.97032500 | 1.93745700  |
| H | 1.43768800  | 3.03379100  | 3.20586400  | O           | -0.02243500 | -1.26874400 | 1.64982400  |
| H | 2.24576000  | 1.56783300  | -3.95073500 | O           | -2.16212100 | -1.95125300 | 1.32554600  |
| H | 2.98540500  | 2.68850000  | -2.80352900 | C           | -1.64635300 | 2.27972000  | -3.33499300 |
| H | 3.88834300  | 1.23680400  | -3.31076300 | C           | 0.02441300  | -3.21478300 | -2.77448700 |
| H | -0.76377200 | -4.01107100 | -2.04915900 | C           | -2.58734300 | 2.67869000  | 2.46449100  |
| H | -0.13230400 | -3.11078600 | -3.43077900 | C           | -0.92266600 | -2.89470000 | 3.12852900  |
| H | 0.93787900  | -4.24129600 | -2.54703700 | H           | -2.67436700 | 2.63294900  | -3.44318400 |
| H | 0.06946100  | -3.36905100 | 3.53789700  | H           | -0.95432400 | 3.11930100  | -3.24520800 |
| H | -0.37125800 | -1.78879600 | 4.21622100  | H           | -1.38316900 | 1.71441300  | -4.23680900 |
| H | -1.52372200 | -2.62614500 | 3.16233300  | H           | -3.54531300 | 2.40981400  | 2.91417800  |
| C | -2.13040800 | 1.13691800  | -0.55693900 | H           | -1.84403000 | 2.88659900  | 3.23752400  |
| N | -1.87862500 | 1.30815000  | -1.87003600 | H           | -2.72865000 | 3.59110500  | 1.87291600  |
| N | -1.64266300 | 1.40850700  | -2.96807500 | H           | -0.04191100 | -3.53336900 | 3.00851000  |
| C | -3.15135100 | 0.08849500  | -0.23987400 | H           | -0.77510200 | -2.29926700 | 4.03613800  |
| C | -3.67868400 | -0.02536500 | 1.05732500  | H           | -1.81757700 | -3.50916100 | 3.23653800  |
| C | -3.59548000 | -0.80313700 | -1.23119800 | H           | 0.26417400  | -2.71771600 | -3.72153900 |
| C | -4.63534400 | -1.00014200 | 1.33923300  | H           | 0.94000400  | -3.68664100 | -2.40821300 |
| H | -3.33981900 | 0.64751000  | 1.83219700  | H           | -0.74884900 | -3.96416100 | -2.95250100 |
| C | -4.54929500 | -1.77507300 | -0.93753900 | C           | 1.97516600  | 0.71543000  | 0.27260700  |
| H | -3.19311400 | -0.75364200 | -2.23811000 | N           | 1.98722500  | 1.02078300  | 2.01086000  |
| C | -5.07810500 | -1.87869700 | 0.34995900  | N           | 1.70166800  | 0.85927500  | 3.07231800  |
| H | -5.03549300 | -1.06824600 | 2.34749800  | C           | 3.10316100  | -0.23496800 | 0.08660400  |
| H | -4.87942000 | -2.45034500 | -1.72235700 | C           | 4.31605300  | 0.15197800  | -0.51949900 |
| H | -5.82506000 | -2.63403800 | 0.57798400  | C           | 2.96622300  | -1.56394200 | 0.53443400  |
| C | -1.96182500 | 2.39771000  | 0.23109400  | C           | 5.34806400  | -0.76790700 | -0.68570900 |
| O | -2.29553900 | 2.53765000  | 1.38712000  | H           | 4.43744300  | 1.16289500  | -0.88828400 |
| O | -1.38294500 | 3.36364900  | -0.51303400 | C           | 4.01175900  | -2.47145200 | 0.38917900  |

|                      |             |             |             |             |             |             |             |
|----------------------|-------------|-------------|-------------|-------------|-------------|-------------|-------------|
| H                    | 2.03747400  | -1.86859400 | 1.00189400  | H           | 0.91659200  | -3.76510500 | 2.99040500  |
| C                    | 5.20295900  | -2.07911100 | -0.22652400 | H           | -0.73763600 | -3.78033800 | 2.30777900  |
| H                    | 6.27100800  | -0.45703000 | -1.16727900 | C           | -1.94867900 | 0.59188800  | 0.03943900  |
| H                    | 3.89305400  | -3.49059500 | 0.74684200  | C           | -3.09334000 | -0.27443300 | 0.00908100  |
| H                    | 6.01431700  | -2.79180600 | -0.34902200 | C           | -4.36978100 | 0.16519500  | 0.46092400  |
| C                    | 2.12353300  | 2.09107800  | -0.30274500 | C           | -2.97404200 | -1.60069900 | -0.48430700 |
| O                    | 2.43281200  | 2.25946500  | -1.46500800 | C           | -5.46272500 | -0.68715500 | 0.43624600  |
| O                    | 1.80011300  | 3.08779700  | 0.54320700  | H           | -4.47372000 | 1.16653500  | 0.86560400  |
| C                    | 1.73703100  | 4.39605100  | -0.05069700 | C           | -4.08398900 | -2.43487900 | -0.53793900 |
| H                    | 1.48845400  | 5.07196600  | 0.76745300  | H           | -2.01146700 | -1.93278200 | -0.84846800 |
| H                    | 2.69894800  | 4.66413300  | -0.49499500 | C           | -5.32318100 | -1.98612500 | -0.07039500 |
| H                    | 0.96223200  | 4.41930500  | -0.82059500 | H           | -6.42635700 | -0.34609700 | 0.80329000  |
| <b>N<sub>2</sub></b> |             |             |             | H           | -3.98621000 | -3.44091600 | -0.93554200 |
| N                    | 0.00000000  | 0.00000000  | 0.55265200  | H           | -6.18465800 | -2.64818200 | -0.10031700 |
| N                    | 0.00000000  | 0.00000000  | -0.55265200 | C           | -2.21469400 | 2.03811000  | 0.25922200  |
| <b>5</b>             |             |             |             | O           | -2.31592500 | 2.53424100  | 1.36521100  |
| Rh                   | 2.38999500  | -0.52113000 | 0.02373800  | O           | -2.30988800 | 2.71349400  | -0.89714900 |
| Rh                   | -0.00307400 | 0.07652000  | -0.00119600 | C           | -2.43214500 | 4.14215700  | -0.77357100 |
| C                    | 1.79200000  | 2.00420100  | -1.27224800 | H           | -2.50225200 | 4.51506100  | -1.79516100 |
| O                    | 2.75968700  | 1.23926400  | -0.98731100 | H           | -3.32766300 | 4.40573000  | -0.20465000 |
| O                    | 0.55785000  | 1.80135000  | -1.00302100 | H           | -1.55164400 | 4.55264300  | -0.27317800 |
| C                    | 1.52544300  | 1.03196800  | 2.30401800  | <b>6</b>    |             |             |             |
| O                    | 2.55695200  | 0.47843400  | 1.81797200  | C           | -0.38913200 | 0.98546600  | -0.00000700 |
| O                    | 0.35457100  | 1.03274900  | 1.79254600  | C           | 0.15169700  | -0.33266200 | -0.00008900 |
| C                    | 0.65122200  | -2.45367400 | 1.31755400  | C           | -0.66012100 | -1.47342100 | -0.00004300 |
| O                    | 1.86887400  | -2.24193600 | 1.04406200  | C           | -2.03774800 | -1.28157300 | 0.00000800  |
| O                    | -0.33710300 | -1.69920100 | 1.01445900  | C           | -2.59501500 | 0.01409300  | 0.00003100  |
| C                    | 0.94562100  | -1.49697800 | -2.29376700 | C           | -1.78594100 | 1.14382300  | 0.00004500  |
| O                    | -0.10798400 | -0.95893100 | -1.80198700 | C           | 0.72668300  | 1.88922200  | 0.00005800  |
| O                    | 2.10113700  | -1.48542600 | -1.77994300 | C           | 1.86097400  | 1.12095200  | -0.00004500 |
| C                    | 1.68762600  | 1.76717200  | 3.61656600  | H           | -0.23503300 | -2.47337900 | -0.00005500 |
| C                    | 0.32578400  | -3.72684000 | 2.06998200  | H           | -2.69638400 | -2.14592100 | -0.00000800 |
| C                    | 2.10447600  | 3.29335700  | -2.00199500 | H           | -3.67588500 | 0.1268500   | 0.00003500  |
| C                    | 0.76594700  | -2.20558800 | -3.61931900 | H           | -2.22547200 | 2.13820400  | 0.00011500  |
| H                    | 2.08778600  | 1.08084100  | 4.36967300  | H           | 0.69063300  | 2.96997900  | 0.00005800  |
| H                    | 2.41606400  | 2.57491300  | 3.48977700  | H           | 2.90165600  | 1.41712600  | -0.00000900 |
| H                    | 0.73405700  | 2.17690100  | 3.95194000  | N           | 1.53029200  | -0.22406300 | -0.00019400 |
| H                    | 1.50884600  | 3.35158500  | -2.91840000 | C           | 2.46052000  | -1.33302600 | 0.00014800  |
| H                    | 1.82602200  | 4.14570000  | -1.37312000 | H           | 2.32883100  | -1.95895800 | 0.89118600  |
| H                    | 3.16727400  | 3.34725500  | -2.24253200 | H           | 2.32752800  | -1.96040200 | -0.88966000 |
| H                    | 0.00010600  | -2.98219000 | -3.52301300 | H           | 3.48058400  | -0.94231800 | -0.00093800 |
| H                    | 0.41404800  | -1.49083700 | -4.37051600 | <b>7-ts</b> |             |             |             |
| H                    | 1.70709600  | -2.65117900 | -3.94465800 | Rh          | -2.73330700 | -0.67258900 | -1.00167500 |
| H                    | 0.61364200  | -4.59048900 | 1.46105100  | Rh          | -0.66434400 | 0.18825900  | 0.04426200  |

|   |             |             |             |          |             |             |             |
|---|-------------|-------------|-------------|----------|-------------|-------------|-------------|
| C | -1.98083000 | -2.04827600 | 1.43923900  | H        | -0.05617300 | 0.94653600  | 5.12689300  |
| O | -2.84753700 | -2.06477200 | 0.51971500  | H        | 0.53562800  | 2.57318600  | 4.65348500  |
| O | -0.94409700 | -1.30285500 | 1.49891500  | H        | -1.05284800 | 2.01091600  | 4.07782200  |
| C | -3.16364000 | 1.39077200  | 0.97966900  | C        | 3.57936900  | -0.73903200 | 0.75758700  |
| O | -3.79541400 | 0.65456500  | 0.16421800  | C        | 3.21277900  | -2.08164300 | 0.52291000  |
| O | -1.90151400 | 1.40893300  | 1.16652500  | C        | 3.87969600  | -2.90415400 | -0.38024700 |
| C | -1.57861900 | 1.60290200  | -2.34847800 | C        | 4.96640300  | -2.34851200 | -1.05986000 |
| O | -2.53802700 | 0.78011100  | -2.44465200 | C        | 5.35704600  | -1.01953700 | -0.83578000 |
| O | -0.66563800 | 1.60187300  | -1.45704600 | C        | 4.67014800  | -0.20496800 | 0.06680900  |
| C | -0.28533300 | -1.88873000 | -1.99472300 | C        | 2.63873600  | -0.20325500 | 1.73607900  |
| O | 0.36772400  | -1.16188100 | -1.16874900 | C        | 1.83232400  | -1.30240700 | 2.10684500  |
| O | -1.54153300 | -1.93466500 | -2.12876100 | H        | 3.58133700  | -3.93440700 | -0.54914900 |
| C | -3.97528600 | 2.33263500  | 1.84529800  | H        | 5.51788200  | -2.95800800 | -1.76998600 |
| C | -1.50632900 | 2.71918100  | -3.36863300 | H        | 6.20723200  | -0.61646600 | -1.37850800 |
| C | -2.20955100 | -3.01242400 | 2.58988500  | H        | 4.97256900  | 0.82573700  | 0.22208300  |
| C | 0.53619500  | -2.76430000 | -2.92134000 | H        | 2.88773200  | 0.57995900  | 2.43576400  |
| H | -4.97326000 | 2.47089100  | 1.42544500  | H        | 1.01407200  | -1.31716300 | 2.80695200  |
| H | -4.07205600 | 1.90525500  | 2.85051100  | N        | 2.13290200  | -2.38301900 | 1.37167600  |
| H | -3.45988800 | 3.29202500  | 1.93807000  | C        | 1.38241100  | -3.62630500 | 1.33441700  |
| H | -3.15149600 | -2.75637900 | 3.08632000  | H        | 0.78444700  | -3.67589800 | 0.41960600  |
| H | -2.31546600 | -4.03163600 | 2.20479700  | H        | 2.07176400  | -4.47478800 | 1.37116900  |
| H | -1.39859900 | -2.96862900 | 3.31979900  | H        | 0.71798600  | -3.66692000 | 2.19692200  |
| H | 0.60636900  | -2.27381500 | -3.89950400 | <b>8</b> |             |             |             |
| H | 1.54610800  | -2.90656100 | -2.53130800 | Rh       | -2.82018500 | -1.19690500 | -0.20334300 |
| H | 0.03787900  | -3.72582600 | -3.07028600 | Rh       | -0.69114900 | -0.01158100 | 0.04716100  |
| H | -1.91853900 | 3.63269600  | -2.92426400 | C        | -0.70322000 | -2.77973200 | 0.99550600  |
| H | -0.46542200 | 2.92016100  | -3.63421700 | O        | -1.90194500 | -2.87164600 | 0.58976700  |
| H | -2.09026600 | 2.46470300  | -4.25517600 | O        | 0.04860200  | -1.75333000 | 0.90945100  |
| C | 1.12684100  | 1.12334900  | 0.86841000  | C        | -2.50122900 | 0.16126500  | 2.32734700  |
| C | 2.03644100  | 1.86796800  | -0.02948800 | O        | -3.31440900 | -0.58973400 | 1.69989500  |
| C | 2.74873300  | 3.01686300  | 0.38895200  | O        | -1.37428200 | 0.57447300  | 1.90449300  |
| C | 2.23881600  | 1.42213600  | -1.35330500 | C        | -2.88943300 | 1.53992500  | -1.11436600 |
| C | 3.58863500  | 3.70167400  | -0.48445600 | O        | -3.64372700 | 0.52554700  | -0.96638500 |
| H | 2.61525500  | 3.39398700  | 1.39569700  | O        | -1.65188200 | 1.60627200  | -0.82929900 |
| C | 3.08155800  | 2.10908900  | -2.22519800 | C        | -1.08866300 | -1.32253500 | -2.54341400 |
| H | 1.72845600  | 0.52721400  | -1.68399600 | O        | -0.21889600 | -0.65829200 | -1.88046200 |
| C | 3.75527500  | 3.25457800  | -1.79926500 | O        | -2.21378200 | -1.71618900 | -2.11742300 |
| H | 4.11038000  | 4.59116600  | -0.14065600 | C        | -2.89425100 | 0.58039400  | 3.72799700  |
| H | 3.21341600  | 1.74519600  | -3.24100100 | C        | -3.53150600 | 2.79538400  | -1.66554100 |
| H | 4.40854100  | 3.79315000  | -2.48124800 | C        | -0.10057100 | -3.99945000 | 1.66303900  |
| C | 0.70128500  | 1.84394800  | 2.10720800  | C        | -0.73340400 | -1.64852300 | -3.97980000 |
| O | 0.38386900  | 3.01927000  | 2.11818200  | H        | -3.98056900 | 0.66427700  | 3.80745300  |
| O | 0.58145300  | 1.05824800  | 3.21132100  | H        | -2.55799300 | -0.18696600 | 4.43544000  |
| C | -0.03865600 | 1.69829200  | 4.33620900  | H        | -2.41153700 | 1.52337000  | 3.99201900  |

|   |             |             |             |             |             |             |             |
|---|-------------|-------------|-------------|-------------|-------------|-------------|-------------|
| H | -0.05571000 | -3.82929400 | 2.74496000  | H           | 6.13466500  | 0.80579300  | 1.04648600  |
| H | -0.71004400 | -4.88381600 | 1.46882600  | H           | 6.71561300  | 0.88457200  | -0.63912600 |
| H | 0.92331300  | -4.15375900 | 1.31057500  | H           | 5.89123900  | 2.29003500  | 0.08595000  |
| H | -0.83527400 | -0.74108900 | -4.58646300 | <b>9-ts</b> |             |             |             |
| H | 0.30752000  | -1.97769300 | -4.04938100 | Rh          | -2.61354400 | -1.15739700 | -0.93109600 |
| H | -1.40145400 | -2.41546400 | -4.37540600 | Rh          | -0.78702800 | 0.08321300  | 0.18394000  |
| H | -4.17725000 | 3.23162100  | -0.89481600 | C           | -1.15942300 | -2.70407700 | 1.04289300  |
| H | -2.76893900 | 3.52444600  | -1.94443600 | O           | -2.14290600 | -2.78179900 | 0.24983000  |
| H | -4.16280600 | 2.54737200  | -2.52357200 | O           | -0.36655500 | -1.71069000 | 1.17368000  |
| C | 1.41070000  | 1.16889100  | 0.27357500  | C           | -3.33083000 | 0.19685700  | 1.52462800  |
| C | 0.97565800  | 2.57713800  | -0.01789400 | O           | -3.83385000 | -0.46051000 | 0.55672100  |
| C | 0.38034500  | 3.39462200  | 0.97393200  | O           | -2.10632100 | 0.51290400  | 1.68068500  |
| C | 1.10241700  | 3.15055800  | -1.30481000 | C           | -2.43181700 | 1.61384700  | -1.70037100 |
| C | -0.03785400 | 4.69093700  | 0.69195100  | O           | -3.02143200 | 0.53665700  | -2.02597900 |
| H | 0.24014400  | 2.99005300  | 1.96506500  | O           | -1.50715600 | 1.73817300  | -0.83400000 |
| C | 0.68032700  | 4.45294100  | -1.58129800 | C           | 0.02640900  | -1.32188800 | -2.32480300 |
| H | 1.51564300  | 2.58485400  | -2.13240400 | O           | 0.40028000  | -0.38902400 | -1.47005200 |
| C | 0.11030500  | 5.24018100  | -0.58478100 | O           | -1.12930700 | -1.77128100 | -2.34577700 |
| H | -0.49046600 | 5.28002900  | 1.48647600  | C           | -4.28569300 | 0.68243300  | 2.59354100  |
| H | 0.80311400  | 4.84521000  | -2.58836500 | C           | -2.88953700 | 2.88352700  | -2.38737700 |
| H | -0.21438800 | 6.25575400  | -0.79572000 | C           | -0.88743500 | -3.90040000 | 1.93271300  |
| C | 1.78552500  | 0.84882700  | 1.67579700  | C           | 1.07337400  | -1.80670000 | -3.29222000 |
| O | 1.36898300  | 1.37814200  | 2.69265000  | H           | -4.60955300 | 1.69943500  | 2.34243000  |
| O | 2.67719200  | -0.19119100 | 1.76103700  | H           | -5.16654600 | 0.03874900  | 2.63922800  |
| C | 2.89590500  | -0.69415100 | 3.08162000  | H           | -3.78033300 | 0.71983300  | 3.56102000  |
| H | 3.61858300  | -1.50479900 | 2.96843600  | H           | -1.56053300 | -4.72261100 | 1.68545000  |
| H | 3.29153200  | 0.08427100  | 3.74071500  | H           | 0.15247000  | -4.22486600 | 1.82176500  |
| H | 1.96262600  | -1.07544800 | 3.50421000  | H           | -1.02983300 | -3.61204500 | 2.97981900  |
| C | 2.96892900  | -0.81099300 | -0.82891100 | H           | 1.46573600  | -0.96320800 | -3.87063800 |
| C | 4.34450100  | -0.68413700 | -0.58688000 | H           | 1.90797000  | -2.25079300 | -2.73794100 |
| C | 5.22809800  | -1.75403600 | -0.53754200 | H           | 0.64207000  | -2.54689000 | -3.96665800 |
| C | 4.68974100  | -3.02268000 | -0.77290700 | H           | -2.10483400 | 3.64170000  | -2.35456600 |
| C | 3.32729900  | -3.17571100 | -1.05087100 | H           | -3.18492300 | 2.67018800  | -3.41769400 |
| C | 2.45865700  | -2.07703400 | -1.08825200 | H           | -3.76838900 | 3.27212200  | -1.85930500 |
| C | 2.35542300  | 0.57821100  | -0.85110100 | C           | 1.21463900  | 1.08106900  | 0.86928600  |
| C | 3.55881800  | 1.41864000  | -0.64662300 | C           | 1.07115400  | 2.55805500  | 0.56753100  |
| H | 6.28700300  | -1.62061700 | -0.33880300 | C           | 1.07234000  | 3.55540800  | 1.56394100  |
| H | 5.34003300  | -3.89218100 | -0.75045900 | C           | 0.97609300  | 3.00960700  | -0.76812100 |
| H | 2.93226400  | -4.16964000 | -1.24211400 | C           | 1.00256000  | 4.91152500  | 1.24059000  |
| H | 1.40562000  | -2.20271200 | -1.29410800 | H           | 1.11371600  | 3.26594400  | 2.60478200  |
| H | 1.84533000  | 0.73294800  | -1.80472300 | C           | 0.92109800  | 4.36375900  | -1.09273200 |
| H | 3.57547300  | 2.49731300  | -0.56946000 | H           | 0.92226100  | 2.28434700  | -1.57333000 |
| N | 4.63903400  | 0.69781200  | -0.41852300 | C           | 0.93483400  | 5.33210300  | -0.08720700 |
| C | 5.92525900  | 1.20045800  | 0.04769600  | H           | 1.00859700  | 5.64475900  | 2.04375800  |

|           |             |             |             |   |             |             |             |
|-----------|-------------|-------------|-------------|---|-------------|-------------|-------------|
| H         | 0.85214500  | 4.65973600  | -2.13752100 | C | -2.00615400 | 1.68274400  | -3.75477600 |
| H         | 0.88595100  | 6.38940700  | -0.33438800 | C | -1.47203500 | -2.75669000 | 3.25512300  |
| C         | 1.20708200  | 0.73544000  | 2.31724200  | C | 0.61948900  | -3.64485800 | -2.21022800 |
| O         | 0.51701800  | 1.26333500  | 3.17474400  | H | -3.91417800 | 3.17423000  | 1.06242900  |
| O         | 2.05336600  | -0.28608400 | 2.64191800  | H | -4.95780800 | 1.92390400  | 1.78977300  |
| C         | 1.96326100  | -0.73747000 | 3.99546700  | H | -3.47798800 | 2.49626100  | 2.63403400  |
| H         | 2.68426700  | -1.55311600 | 4.07991900  | H | -2.10276200 | -3.64662200 | 3.21332000  |
| H         | 2.21307800  | 0.06600400  | 4.69409300  | H | -0.44395800 | -3.02614200 | 3.51146900  |
| H         | 0.95324100  | -1.09379900 | 4.21725900  | H | -1.84834100 | -2.09442900 | 4.04362100  |
| C         | 2.99202600  | -0.91427900 | 0.08200900  | H | 1.08799300  | -3.26953600 | -3.12788900 |
| C         | 4.21348900  | -0.82692000 | -0.62541000 | H | 1.42131200  | -3.91085800 | -1.51186500 |
| C         | 5.05976800  | -1.91589400 | -0.85613700 | H | 0.01373500  | -4.52050800 | -2.44408200 |
| C         | 4.66084000  | -3.14582500 | -0.34770600 | H | -1.08559200 | 1.59922800  | -4.34167100 |
| C         | 3.44823700  | -3.26574200 | 0.35724000  | H | -2.86132200 | 1.37301900  | -4.35751300 |
| C         | 2.61167600  | -2.17441000 | 0.57136300  | H | -2.11447400 | 2.73373300  | -3.46755300 |
| C         | 2.33493400  | 0.42531700  | 0.01241900  | C | 1.27782600  | 1.21220200  | 0.73106600  |
| C         | 3.30974500  | 1.21358400  | -0.65973300 | C | 1.04547100  | 2.64965200  | 0.30230800  |
| H         | 5.98834300  | -1.80707200 | -1.40849500 | C | 0.81335700  | 3.70207700  | 1.21202800  |
| H         | 5.28908900  | -4.01926600 | -0.49636900 | C | 1.08631900  | 3.00196300  | -1.06474700 |
| H         | 3.16054600  | -4.23750200 | 0.74987100  | C | 0.64720300  | 5.01892200  | 0.78043900  |
| H         | 1.68315800  | -2.27354800 | 1.11543800  | H | 0.74912800  | 3.48856800  | 2.26946600  |
| H         | 1.53223800  | -0.02359800 | -1.05153300 | C | 0.92416600  | 4.31687700  | -1.49567900 |
| H         | 3.26500000  | 2.27107700  | -0.87485500 | H | 1.22711000  | 2.22632600  | -1.80591200 |
| N         | 4.37533900  | 0.49474000  | -1.04667900 | C | 0.70409100  | 5.34255200  | -0.57449700 |
| C         | 5.49637400  | 0.98710300  | -1.83282600 | H | 0.47635400  | 5.79792900  | 1.52001900  |
| H         | 6.43568000  | 0.79671200  | -1.30485700 | H | 0.96300300  | 4.53686800  | -2.56053700 |
| H         | 5.52962300  | 0.49162700  | -2.80904900 | H | 0.57772000  | 6.36980700  | -0.90712200 |
| H         | 5.38183300  | 2.06219000  | -1.98032600 | C | 1.18665100  | 1.00241700  | 2.21783500  |
| <b>10</b> |             |             |             | O | 0.37700800  | 1.50639000  | 2.97690400  |
| Rh        | -2.70000400 | -1.19339700 | -0.60507800 | O | 2.13641000  | 0.14504400  | 2.69475600  |
| Rh        | -0.62567700 | 0.06211700  | 0.05069500  | C | 2.03460700  | -0.15560800 | 4.08877600  |
| C         | -1.51422500 | -2.01048300 | 1.93800600  | H | 2.85198500  | -0.84821600 | 4.29893300  |
| O         | -2.49181600 | -2.24932100 | 1.16680300  | H | 2.13870800  | 0.75021300  | 4.69279000  |
| O         | -0.56183400 | -1.18580400 | 1.72426100  | H | 1.06985400  | -0.61900200 | 4.31400500  |
| C         | -3.10593500 | 1.19885100  | 0.96818300  | C | 2.95534400  | -0.81270800 | 0.12123600  |
| O         | -3.73239700 | 0.25007900  | 0.39801800  | C | 4.14708000  | -0.88410300 | -0.66862100 |
| O         | -1.84266200 | 1.36493700  | 1.00511800  | C | 4.86694500  | -2.06996500 | -0.85703800 |
| C         | -1.89617300 | 0.83420900  | -2.50440900 | C | 4.40421800  | -3.22006800 | -0.22727700 |
| O         | -2.78762300 | -0.05221600 | -2.32075000 | C | 3.25000500  | -3.18133800 | 0.58118200  |
| O         | -0.90776200 | 1.08880200  | -1.74137400 | C | 2.53504900  | -1.99897900 | 0.76979700  |
| C         | -0.25272300 | -2.57677800 | -1.62055200 | C | 2.48382400  | 0.57245900  | 0.08665000  |
| O         | 0.38276000  | -1.48457700 | -1.13745500 | C | 3.42579500  | 1.23003600  | -0.68226100 |
| O         | -1.47525600 | -2.63495300 | -1.59190100 | H | 5.76699900  | -2.08961600 | -1.46516800 |
| C         | -3.92680700 | 2.25961200  | 1.66582800  | H | 4.94688000  | -4.15355600 | -0.34777200 |

|              |             |             |             |           |             |             |             |
|--------------|-------------|-------------|-------------|-----------|-------------|-------------|-------------|
| H            | 2.92798800  | -4.08428100 | 1.09406600  | C         | -3.75384600 | 0.50971400  | 3.10553900  |
| H            | 1.67137200  | -1.97508400 | 1.42410400  | H         | -2.93876400 | 2.17537900  | 2.04119700  |
| H            | 1.35238300  | -1.59848200 | -0.94398100 | C         | -2.95284400 | -1.67112000 | 2.45808300  |
| H            | 3.47601800  | 2.27785800  | -0.93551400 | H         | -1.47188900 | -1.70265300 | 0.90236600  |
| N            | 4.41293000  | 0.37804800  | -1.13990700 | C         | -3.76668300 | -0.87980900 | 3.26741800  |
| C            | 5.53330700  | 0.75159300  | -1.97945500 | H         | -4.38436900 | 1.13667300  | 3.73073200  |
| H            | 6.48305800  | 0.48049300  | -1.50429300 | H         | -2.95279100 | -2.75192300 | 2.57616700  |
| H            | 5.47867100  | 0.26172200  | -2.95961300 | H         | -4.40656900 | -1.33702600 | 4.01795400  |
| H            | 5.51648300  | 1.83284300  | -2.12949000 | C         | -0.97678000 | 2.38214200  | 0.38780200  |
| <b>11-ts</b> |             |             |             | O         | -0.82021800 | 2.98316000  | 1.43528200  |
| Rh           | 3.19060100  | -0.72404600 | -0.09627100 | O         | -0.85378200 | 2.99579100  | -0.81973300 |
| Rh           | 0.85253900  | 0.06200100  | 0.01580100  | C         | -0.44727200 | 4.36936700  | -0.76414000 |
| C            | 1.98309200  | -0.10182200 | -2.68341900 | H         | -0.40228500 | 4.70101400  | -1.80274200 |
| O            | 3.06205600  | -0.49524600 | -2.15461300 | H         | -1.17059100 | 4.96828200  | -0.20280300 |
| O            | 0.89141100  | 0.16617900  | -2.06766600 | H         | 0.53206400  | 4.45150400  | -0.29024200 |
| C            | 2.93683400  | 2.13505100  | 0.16164400  | C         | -4.34482000 | 0.66472900  | -1.06633500 |
| O            | 3.81537300  | 1.22391200  | 0.08940900  | C         | -3.94127500 | -0.68413200 | -1.32989200 |
| O            | 1.67312200  | 1.97073300  | 0.12111600  | C         | -4.85655300 | -1.74930200 | -1.26525500 |
| C            | 2.11010200  | -0.54408300 | 2.58328900  | C         | -6.16255600 | -1.44411100 | -0.91849900 |
| O            | 3.16319800  | -0.88265300 | 1.95883400  | C         | -6.57823800 | -0.11607200 | -0.63671100 |
| O            | 1.02229800  | -0.12582700 | 2.06516300  | C         | -5.68537700 | 0.93438400  | -0.70240700 |
| C            | 1.24172500  | -2.85942500 | -0.20155300 | C         | -3.21078900 | 1.46793300  | -1.27336000 |
| O            | 0.33201100  | -1.96487800 | -0.12378400 | C         | -2.10897100 | 0.61529100  | -1.54799100 |
| O            | 2.48916900  | -2.65736800 | -0.25053200 | H         | -4.55438400 | -2.77059700 | -1.47342500 |
| C            | 3.42571400  | 3.56241500  | 0.29454800  | H         | -6.89377400 | -2.24562500 | -0.85782200 |
| C            | 2.12730500  | -0.64506200 | 4.09357000  | H         | -7.61366100 | 0.06628300  | -0.36524300 |
| C            | 1.97244800  | 0.09664100  | -4.18507900 | H         | -6.00017600 | 1.95194100  | -0.48904300 |
| C            | 0.77359400  | -4.30080900 | -0.21070100 | H         | -3.14661500 | 2.54072600  | -1.19090000 |
| H            | 4.49959000  | 3.57991500  | 0.48777700  | H         | -1.21510400 | 0.86598500  | -2.10190100 |
| H            | 3.21978100  | 4.10715800  | -0.63382300 | N         | -2.61628400 | -0.68705300 | -1.66222300 |
| H            | 2.88785600  | 4.06432600  | 1.10419300  | C         | -1.90526700 | -1.82589900 | -2.21900400 |
| H            | 2.05297700  | 1.16788500  | -4.40370200 | H         | -1.92334200 | -2.66874100 | -1.52315500 |
| H            | 2.81605700  | -0.42124500 | -4.64459900 | H         | -2.36484800 | -2.12799900 | -3.16849500 |
| H            | 1.02996700  | -0.25823800 | -4.61149600 | H         | -0.86859300 | -1.53918400 | -2.38217000 |
| H            | 0.51760100  | -4.59879900 | 0.81289600  | <b>12</b> |             |             |             |
| H            | -0.12467400 | -4.41105900 | -0.82453100 | Rh        | 3.71204300  | 0.24916600  | 0.67052300  |
| H            | 1.56544200  | -4.95586900 | -0.57815400 | Rh        | 1.53589800  | -0.09246800 | -0.30908100 |
| H            | 3.10795000  | -0.96990400 | 4.44488000  | C         | 2.37649800  | -2.17092100 | 1.55888600  |
| H            | 1.87478100  | 0.32728600  | 4.52795900  | O         | 3.45383500  | -1.51632800 | 1.70922400  |
| H            | 1.36165400  | -1.35666400 | 4.42024100  | O         | 1.40010000  | -1.84298100 | 0.80468800  |
| C            | -1.19914800 | 0.90335400  | 0.30151600  | C         | 3.74925100  | -1.23287200 | -1.81830600 |
| C            | -2.09026700 | 0.31644100  | 1.32359400  | O         | 4.52374600  | -0.78747600 | -0.91363800 |
| C            | -2.94129600 | 1.09744800  | 2.14341300  | O         | 2.47954900  | -1.11694700 | -1.84102800 |
| C            | -2.12511400 | -1.08290400 | 1.50173200  | C         | 2.89596500  | 2.32135900  | -1.17561800 |

|   |             |             |             |              |             |             |             |
|---|-------------|-------------|-------------|--------------|-------------|-------------|-------------|
| O | 3.85900400  | 1.99315700  | -0.40813300 | C            | -7.72374000 | -0.52831700 | -0.80274100 |
| O | 1.81334700  | 1.67208300  | -1.33694100 | C            | -6.53049300 | -1.09191300 | -1.27445900 |
| C | 1.53848100  | 1.41318500  | 2.18554800  | C            | -4.03953700 | -1.63153400 | -0.65733600 |
| O | 0.74698400  | 0.95159500  | 1.29989600  | C            | -3.36409500 | -1.44687700 | 0.67229900  |
| O | 2.80258600  | 1.27387600  | 2.20575700  | H            | -6.74442500 | 0.39209500  | 2.34616400  |
| C | 4.38433000  | -1.96007900 | -2.98331800 | H            | -8.70979300 | 0.45577400  | 0.83824500  |
| C | 3.06578000  | 3.58147200  | -1.99420500 | H            | -8.59872900 | -0.49580900 | -1.44508900 |
| C | 2.25394500  | -3.47378400 | 2.31875800  | H            | -6.47142800 | -1.49256000 | -2.28365600 |
| C | 0.91990700  | 2.22941100  | 3.29952500  | H            | -3.86663300 | -2.50893500 | -1.26977200 |
| H | 5.45743600  | -2.07696700 | -2.82504200 | H            | -2.67195200 | -2.16374200 | 1.10435900  |
| H | 3.91504700  | -2.94080400 | -3.10941400 | N            | -4.31847400 | -0.86635100 | 1.55685600  |
| H | 4.20847900  | -1.39179000 | -3.90303900 | C            | -3.97686500 | -0.30816000 | 2.84653100  |
| H | 2.74492300  | -4.26851100 | 1.74444000  | H            | -3.74148500 | 0.76444400  | 2.79579700  |
| H | 2.76062200  | -3.39567500 | 3.28342500  | H            | -4.80717800 | -0.45287500 | 3.54688400  |
| H | 1.20483400  | -3.74302700 | 2.45722900  | H            | -3.10497700 | -0.83685000 | 3.24332800  |
| H | 0.79270100  | 3.26175000  | 2.95265500  | <b>13-ts</b> |             |             |             |
| H | -0.06602400 | 1.83650300  | 3.55929100  | Rh           | 2.92689000  | 0.48375800  | 1.18513700  |
| H | 1.57210300  | 2.23642700  | 4.17494900  | Rh           | 1.31068700  | -0.27800900 | -0.47347700 |
| H | 3.71729600  | 4.28745400  | -1.47474600 | C            | 1.75388400  | -2.11357400 | 1.74358400  |
| H | 3.53434300  | 3.32183100  | -2.95096400 | O            | 2.57441600  | -1.26617500 | 2.21972800  |
| H | 2.09319900  | 4.03260500  | -2.20201500 | O            | 1.08181300  | -1.98665100 | 0.66701600  |
| C | -2.86742700 | -0.61645100 | -0.56235800 | C            | 4.04046400  | -1.07054400 | -0.98187900 |
| C | -3.08528900 | 0.86804200  | -0.64206600 | O            | 4.37181700  | -0.46180300 | 0.08502200  |
| C | -3.86940400 | 1.41581000  | -1.66515400 | O            | 2.86377200  | -1.15666400 | -1.46779900 |
| C | -2.46783100 | 1.73158200  | 0.27238200  | C            | 2.52398100  | 2.31574600  | -1.03818100 |
| C | -4.04852500 | 2.79599900  | -1.76463700 | O            | 3.18593900  | 2.18508200  | 0.03945500  |
| H | -4.34748900 | 0.75713500  | -2.38360700 | O            | 1.65247200  | 1.50348300  | -1.49392800 |
| C | -2.64744700 | 3.11225600  | 0.17492400  | C            | 0.15284200  | 1.33082900  | 1.77938900  |
| H | -1.81221500 | 1.32510900  | 1.03591600  | O            | -0.16754800 | 0.68511100  | 0.68350300  |
| C | -3.44189000 | 3.64843600  | -0.84055800 | O            | 1.32669500  | 1.39436700  | 2.19687300  |
| H | -4.66283600 | 3.20343100  | -2.56324900 | C            | 5.13626200  | -1.78805100 | -1.73738300 |
| H | -2.15781500 | 3.77005100  | 0.88849000  | C            | 2.82160900  | 3.54085900  | -1.87718500 |
| H | -3.58300800 | 4.72364000  | -0.91463700 | C            | 1.57639200  | -3.40771200 | 2.50653700  |
| C | -1.54542400 | -1.09307100 | -1.05180200 | C            | -0.95256900 | 2.00305400  | 2.54670600  |
| O | -0.58045500 | -0.35215700 | -1.23391800 | H            | 5.17247000  | -2.83196700 | -1.40403000 |
| O | -1.50602000 | -2.41845200 | -1.25414600 | H            | 4.92483500  | -1.78156700 | -2.80902100 |
| C | -0.27780000 | -2.98314200 | -1.76470700 | H            | 6.10410600  | -1.32637100 | -1.53186300 |
| H | -0.54119100 | -3.99598400 | -2.07244000 | H            | 2.26864400  | -4.15520600 | 2.10100300  |
| H | 0.08370600  | -2.39720300 | -2.61150000 | H            | 1.80910700  | -3.26154200 | 3.56330300  |
| H | 0.47883000  | -2.99496800 | -0.98064300 | H            | 0.55940800  | -3.78632500 | 2.38282000  |
| C | -5.41914300 | -1.11641000 | -0.44263500 | H            | -1.42516500 | 2.77752900  | 1.93381200  |
| C | -5.50682200 | -0.62201800 | 0.87810500  | H            | -1.73164900 | 1.27768200  | 2.79918900  |
| C | -6.67948800 | -0.02445300 | 1.34581000  | H            | -0.54554100 | 2.44903600  | 3.45457500  |
| C | -7.78389600 | 0.00737000  | 0.48741900  | H            | 1.95871900  | 3.80909800  | -2.49076900 |



|           |             |             |             |   |             |             |             |
|-----------|-------------|-------------|-------------|---|-------------|-------------|-------------|
| H         | 3.11738600  | 4.37695500  | -1.23954400 | O | 2.52234900  | -1.19920200 | 2.27318500  |
| H         | 3.65815200  | 3.31230900  | -2.54807200 | O | 1.01601200  | -1.94548600 | 0.74442900  |
| C         | -2.36206200 | -0.99474300 | -0.83567900 | C | 4.00099700  | -1.19828000 | -0.92655000 |
| C         | -3.51309100 | -1.82065400 | -0.40617400 | O | 4.34313500  | -0.55036100 | 0.11267100  |
| C         | -3.34572100 | -2.97412700 | 0.38731200  | O | 2.82445500  | -1.27207900 | -1.41809300 |
| C         | -4.82895300 | -1.48282000 | -0.78381600 | C | 2.60423300  | 2.22183500  | -1.15490400 |
| C         | -4.43692600 | -3.74735800 | 0.78009600  | O | 3.24855600  | 2.12907600  | -0.06082800 |
| H         | -2.34351200 | -3.26184500 | 0.68699300  | O | 1.72030500  | 1.40922700  | -1.58317100 |
| C         | -5.92206400 | -2.25195200 | -0.38551700 | C | 0.19376900  | 1.52169700  | 1.76307500  |
| H         | -4.99265100 | -0.60701900 | -1.40635100 | O | -0.13644900 | 0.80538300  | 0.67459900  |
| C         | -5.73371400 | -3.39075200 | 0.40057300  | O | 1.36271100  | 1.52442700  | 2.14797500  |
| H         | -4.27400500 | -4.63117500 | 1.39280600  | C | 5.07660700  | -1.98308500 | -1.64091400 |
| H         | -6.92318600 | -1.96513300 | -0.69914100 | C | 2.93871500  | 3.39739900  | -2.04785300 |
| H         | -6.58390900 | -3.99260500 | 0.71110800  | C | 1.45646800  | -3.29450800 | 2.64937400  |
| C         | -1.22726700 | -1.54241400 | -1.42565500 | C | -0.89601700 | 2.27776100  | 2.45503800  |
| O         | -0.23915100 | -0.84904800 | -1.88883200 | H | 5.06544100  | -3.01615300 | -1.27389700 |
| O         | -1.19521700 | -2.89877200 | -1.57399100 | H | 4.88011900  | -2.00319800 | -2.71522100 |
| C         | -0.09379200 | -3.43756400 | -2.30650800 | H | 6.05873200  | -1.55283500 | -1.43574100 |
| H         | -0.26633300 | -4.51617200 | -2.32529400 | H | 2.09942500  | -4.09190300 | 2.25811600  |
| H         | -0.06891500 | -3.04751700 | -3.32944500 | H | 1.72067700  | -3.11906800 | 3.69405800  |
| H         | 0.85862100  | -3.21680600 | -1.81819400 | H | 0.41933100  | -3.62601700 | 2.56207400  |
| C         | -3.37443400 | 1.29397400  | 0.08142100  | H | -1.32305900 | 3.03164800  | 1.78436100  |
| C         | -3.29395300 | 2.63194900  | -0.37502900 | H | -1.71630100 | 1.60576400  | 2.72785600  |
| C         | -3.99079500 | 3.68404500  | 0.22674000  | H | -0.48689800 | 2.75880700  | 3.34350700  |
| C         | -4.80457900 | 3.37070200  | 1.31194300  | H | 2.07724000  | 3.67275400  | -2.66009400 |
| C         | -4.90621300 | 2.04771600  | 1.78086500  | H | 3.27710300  | 4.24678400  | -1.45048500 |
| C         | -4.19777800 | 1.00898100  | 1.18148200  | H | 3.75413500  | 3.10630800  | -2.72061200 |
| C         | -2.43005200 | 0.49165800  | -0.72747700 | C | -2.41857100 | -0.98613500 | -0.87296700 |
| C         | -1.92278100 | 1.42390900  | -1.67431800 | C | -3.55234700 | -1.83086800 | -0.42738500 |
| H         | -3.90708800 | 4.70419500  | -0.13612100 | C | -3.37200600 | -2.97967400 | 0.37119100  |
| H         | -5.36921000 | 4.15908100  | 1.80136700  | C | -4.87555800 | -1.49410600 | -0.78159200 |
| H         | -5.55276600 | 1.83262500  | 2.62695500  | C | -4.45720600 | -3.74754900 | 0.78972600  |
| H         | -4.28742200 | -0.00612700 | 1.55049100  | H | -2.36656600 | -3.26873000 | 0.65645400  |
| H         | -1.27899800 | 0.71107500  | 0.05856800  | C | -5.96126900 | -2.26099400 | -0.36110900 |
| H         | -1.18312100 | 1.23051700  | -2.43747400 | H | -5.04824100 | -0.61917300 | -1.40216900 |
| N         | -2.39685000 | 2.67152300  | -1.44317000 | C | -5.76040500 | -3.39455200 | 0.42940900  |
| C         | -1.95646300 | 3.88297700  | -2.11614600 | H | -4.28371700 | -4.62633400 | 1.40692300  |
| H         | -2.81096900 | 4.39602700  | -2.56916000 | H | -6.96740800 | -1.97463800 | -0.65866600 |
| H         | -1.46580900 | 4.56438000  | -1.41183500 | H | -6.60514100 | -3.99408300 | 0.75884100  |
| H         | -1.24761200 | 3.61127100  | -2.89977400 | C | -1.24946300 | -1.53286600 | -1.40345600 |
| <b>14</b> |             |             |             | O | -0.26186100 | -0.84380500 | -1.87589100 |
| Rh        | 2.94071600  | 0.49179800  | 1.16352900  | O | -1.17391600 | -2.89670600 | -1.46314400 |
| Rh        | 1.30508200  | -0.30600000 | -0.48722400 | C | -0.07627900 | -3.44996200 | -2.18873800 |
| C         | 1.67927000  | -2.04304600 | 1.82966800  | H | -0.23977100 | -4.53012100 | -2.17081100 |

|           |             |             |             |                           |             |             |             |
|-----------|-------------|-------------|-------------|---------------------------|-------------|-------------|-------------|
| H         | -0.06509300 | -3.09367600 | -3.22423300 | H                         | -5.27853300 | -1.12180500 | -0.88983400 |
| H         | 0.88058400  | -3.20848600 | -1.71912100 | H                         | -5.27735200 | -1.12295900 | 0.89028500  |
| C         | -3.36193600 | 1.29533800  | 0.05931100  | <b>CH<sub>3</sub>COOH</b> |             |             |             |
| C         | -3.26104600 | 2.65161000  | -0.37093700 | C                         | 1.39758900  | -0.10974700 | -0.00002600 |
| C         | -3.85760800 | 3.70949400  | 0.32791600  | H                         | 1.68523500  | -0.69299800 | -0.88105700 |
| C         | -4.56792500 | 3.39948100  | 1.48362800  | H                         | 1.68543400  | -0.68997700 | 0.88298400  |
| C         | -4.68177200 | 2.06640300  | 1.93011200  | H                         | 1.91753500  | 0.84844800  | -0.00148100 |
| C         | -4.09112600 | 1.01741100  | 1.23281500  | C                         | -0.09248500 | 0.12562400  | -0.00009000 |
| C         | -2.59189500 | 0.47995100  | -0.87894900 | O                         | -0.64579600 | 1.20195400  | 0.00001000  |
| C         | -2.08410100 | 1.38808200  | -1.80299200 | O                         | -0.77860000 | -1.04667400 | -0.00000900 |
| H         | -3.77540500 | 4.73546800  | -0.02023100 | H                         | -1.72365400 | -0.80297900 | 0.00024500  |
| H         | -5.04763000 | 4.19610300  | 2.04559400  | <b>16</b>                 |             |             |             |
| H         | -5.25035700 | 1.85525100  | 2.83174000  | Rh                        | -1.21883100 | -2.01635800 | -0.36135400 |
| H         | -4.19967200 | -0.00516000 | 1.57779700  | Rh                        | -2.90042800 | -0.32059800 | 0.21681400  |
| H         | -1.07427000 | 0.85424800  | 0.31091300  | C                         | -1.57683100 | -1.56534200 | 2.48757600  |
| H         | -1.44314200 | 1.18983900  | -2.64854300 | O                         | -0.96078200 | -2.31427400 | 1.66480000  |
| N         | -2.47688100 | 2.67801200  | -1.50683900 | O                         | -2.43008200 | -0.65942300 | 2.19568400  |
| C         | -2.12019400 | 3.86460000  | -2.25907800 | C                         | -3.95340600 | -3.01503400 | -0.03217300 |
| H         | -3.00907600 | 4.33687700  | -2.69392500 | O                         | -2.79506800 | -3.37929800 | -0.37904200 |
| H         | -1.61238200 | 4.59771000  | -1.62054600 | O                         | -4.27089300 | -1.82296900 | 0.29902300  |
| H         | -1.44376600 | 3.57865300  | -3.06669400 | C                         | -2.50188400 | -0.71417200 | -2.63788300 |
| <b>15</b> |             |             |             | O                         | -1.61334600 | -1.57075700 | -2.34654700 |
| C         | 0.72636200  | 0.72249900  | -0.00016500 | O                         | -3.23615600 | -0.07414500 | -1.80791500 |
| C         | -0.40692400 | -0.01353700 | -0.00031400 | C                         | -5.06134400 | -4.04280400 | -0.03324600 |
| H         | 0.59754400  | 1.80490800  | -0.00012300 | C                         | -2.69927400 | -0.39379000 | -4.10316100 |
| H         | -0.41036100 | -1.09750400 | -0.00034600 | C                         | -1.23936100 | -1.73297900 | 3.95141000  |
| C         | 2.10514700  | 0.24455900  | -0.00003900 | H                         | -5.61471000 | -3.96954800 | -0.97689600 |
| C         | 3.14681100  | 1.19213200  | 0.00027800  | H                         | -4.64600400 | -5.04884100 | 0.04989900  |
| C         | 2.44612300  | -1.12355000 | -0.00022500 | H                         | -5.76063700 | -3.84843700 | 0.78367500  |
| C         | 4.48145600  | 0.79269600  | 0.00041600  | H                         | -0.41612400 | -1.05066300 | 4.19484900  |
| H         | 2.89734000  | 2.25034400  | 0.00041700  | H                         | -2.09773000 | -1.47476000 | 4.57563800  |
| C         | 3.77819200  | -1.52184100 | -0.00009000 | H                         | -0.90890400 | -2.75446800 | 4.15089200  |
| H         | 1.66271100  | -1.87522700 | -0.00048300 | H                         | -2.03203500 | 0.43256800  | -4.37605400 |
| C         | 4.80106000  | -0.56629000 | 0.00023400  | H                         | -2.44193700 | -1.25778100 | -4.71946300 |
| H         | 5.27026400  | 1.53971900  | 0.00066400  | H                         | -3.72824800 | -0.07960700 | -4.29191700 |
| H         | 4.02394200  | -2.58019800 | -0.00024000 | C                         | 2.62198500  | -0.60522800 | 0.58498700  |
| H         | 5.84062600  | -0.88236400 | 0.00033800  | C                         | 2.38755800  | 0.61139000  | 1.37518600  |
| C         | -1.71667200 | 0.65305500  | -0.00035200 | C                         | 1.11228900  | 0.98120600  | 1.87212800  |
| O         | -1.89409700 | 1.86083700  | -0.00056300 | C                         | 3.46952100  | 1.45308400  | 1.73447400  |
| C         | -2.92208800 | -0.31523300 | -0.00009900 | C                         | 0.94506900  | 2.09492900  | 2.69470500  |
| O         | -2.80900500 | -1.52515900 | -0.00028800 | H                         | 0.25231400  | 0.38202600  | 1.60844700  |
| O         | -4.08517700 | 0.34195700  | 0.00036200  | C                         | 3.29456300  | 2.56948000  | 2.55022000  |
| C         | -5.25901500 | -0.48754900 | 0.00062700  | H                         | 4.46285000  | 1.21113100  | 1.37186600  |
| H         | -6.10266600 | 0.20236400  | 0.00160900  | C                         | 2.03108000  | 2.90124600  | 3.04662100  |

|   |             |             |             |                    |             |             |             |
|---|-------------|-------------|-------------|--------------------|-------------|-------------|-------------|
| H | -0.04987900 | 2.32949600  | 3.06818800  | H                  | -0.61156200 | 6.19043300  | -1.15711400 |
| H | 4.15628500  | 3.18478600  | 2.80092500  | C                  | 3.18368100  | 5.44146100  | -0.80066600 |
| H | 1.89617000  | 3.76613400  | 3.69062500  | H                  | 2.59180300  | 3.44337600  | -0.25414700 |
| C | 1.61657200  | -1.27203800 | -0.10361000 | C                  | 2.74679500  | 6.71480900  | -1.17193200 |
| O | 0.44345800  | -0.80187000 | -0.40291800 | H                  | 1.03877800  | 7.96980900  | -1.58944800 |
| O | 1.96796000  | -2.53082900 | -0.54445500 | H                  | 4.24521300  | 5.23493100  | -0.70109700 |
| C | 1.12706700  | -3.18452300 | -1.46359800 | H                  | 3.46954700  | 7.50253400  | -1.36664900 |
| H | 0.17136600  | -3.51814800 | -0.98662900 | H                  | 0.40569900  | 2.61793400  | -0.24367900 |
| H | 1.64779100  | -4.09842200 | -1.75857100 | <b>17-threo-ts</b> |             |             |             |
| H | 0.89522800  | -2.57568100 | -2.34204000 | Rh                 | 2.09157700  | -1.28701200 | -0.91153600 |
| C | 4.79372000  | -1.37447200 | -0.68332300 | Rh                 | 3.02217000  | 0.06514300  | 0.88149500  |
| C | 6.04752700  | -1.90033000 | -0.26608400 | C                  | 2.94477100  | 1.35150300  | -1.73248900 |
| C | 7.06227800  | -2.22532200 | -1.17412900 | O                  | 2.57082400  | 0.23186100  | -2.22010800 |
| C | 6.80875100  | -2.01180900 | -2.52586500 | O                  | 3.14329300  | 1.60007500  | -0.50077300 |
| C | 5.57532800  | -1.48487400 | -2.96102500 | C                  | 4.95447900  | -1.55058300 | -0.56752000 |
| C | 4.57071800  | -1.16704500 | -2.05362600 | O                  | 3.94397800  | -2.08307700 | -1.14160500 |
| C | 3.99564200  | -1.15599000 | 0.50445300  | O                  | 4.89507000  | -0.58356500 | 0.24695200  |
| C | 4.79147100  | -1.54758400 | 1.55731900  | C                  | 2.15985600  | -2.56940300 | 1.69937500  |
| H | 8.01473600  | -2.62912800 | -0.84096800 | O                  | 1.67312900  | -2.71423500 | 0.52507400  |
| H | 7.57509800  | -2.25488700 | -3.25738300 | O                  | 2.85515500  | -1.58726300 | 2.10462500  |
| H | 5.41070400  | -1.32657300 | -4.02389500 | C                  | 6.30679900  | -2.15124300 | -0.86843900 |
| H | 3.62312300  | -0.75769600 | -2.39409900 | C                  | 1.85890000  | -3.65790700 | 2.70387000  |
| H | 4.57040800  | -1.54350300 | 2.61656100  | C                  | 3.16767600  | 2.49171500  | -2.69844100 |
| N | 6.02566600  | -1.99401600 | 1.11273000  | H                  | 6.47519700  | -2.99883100 | -0.19357500 |
| C | 7.09867300  | -2.50016500 | 1.93925100  | H                  | 6.34136200  | -2.52167500 | -1.89543700 |
| H | 7.31478000  | -3.55193400 | 1.71231800  | H                  | 7.09386300  | -1.41404100 | -0.69783600 |
| H | 8.01752600  | -1.91818000 | 1.79416400  | H                  | 2.45220000  | 3.29026200  | -2.47576300 |
| H | 6.80466000  | -2.42571200 | 2.98869800  | H                  | 4.17296400  | 2.90091500  | -2.55805300 |
| C | -0.04441400 | 3.59544700  | -0.40581900 | H                  | 3.04030500  | 2.15765200  | -3.72940400 |
| C | -1.40501300 | 3.67203600  | -0.31159100 | H                  | 0.95455100  | -3.38198900 | 3.25914200  |
| H | -1.95323200 | 4.60013900  | -0.42359700 | H                  | 1.68237200  | -4.61111900 | 2.20109300  |
| C | -2.18847200 | 2.50378600  | -0.03911400 | H                  | 2.67906700  | -3.74651000 | 3.41979100  |
| O | -1.69713000 | 1.35873300  | 0.10821900  | C                  | -2.11317300 | 0.22991800  | -0.92441600 |
| C | -3.69957700 | 2.72047500  | 0.07152000  | C                  | -1.97876100 | 1.56816500  | -1.56530600 |
| O | -4.26423500 | 3.75067900  | -0.21451900 | C                  | -0.85281800 | 1.93432100  | -2.33447200 |
| O | -4.32102300 | 1.61993500  | 0.54833600  | C                  | -3.00075600 | 2.53585400  | -1.43802900 |
| C | -5.76412300 | 1.67773200  | 0.64567500  | C                  | -0.76783100 | 3.18193000  | -2.95193000 |
| H | -6.05760500 | 0.71043900  | 1.04939300  | H                  | -0.03266900 | 1.23864200  | -2.46276700 |
| H | -6.05201900 | 2.49271700  | 1.31229000  | C                  | -2.90723400 | 3.78507700  | -2.04874100 |
| H | -6.19080800 | 1.83581300  | -0.34678100 | H                  | -3.87132200 | 2.31246900  | -0.83510700 |
| C | 0.87303400  | 4.68327300  | -0.67459100 | C                  | -1.79181400 | 4.11960100  | -2.81772600 |
| C | 0.44766800  | 5.97787800  | -1.04866500 | H                  | 0.10851900  | 3.41668700  | -3.55111300 |
| C | 2.25693600  | 4.43133300  | -0.55705700 | H                  | -3.71509900 | 4.50138000  | -1.91832800 |
| C | 1.37622900  | 6.97970000  | -1.29638700 | H                  | -1.72121100 | 5.09074800  | -3.29960500 |

|   |             |             |             |                 |             |             |             |
|---|-------------|-------------|-------------|-----------------|-------------|-------------|-------------|
| C | -0.97773600 | -0.69475400 | -1.12743300 | C               | -5.55616100 | 1.75880500  | 2.91711200  |
| O | 0.19815200  | -0.41608500 | -0.81670200 | H               | -5.22047500 | 3.79219400  | 2.27711700  |
| O | -1.31977900 | -1.85018200 | -1.71288800 | H               | -5.57366000 | -0.33227400 | 3.45228900  |
| C | -0.35809800 | -2.89353200 | -1.92096300 | H               | -6.53754600 | 1.96417400  | 3.33666100  |
| H | 0.48255400  | -2.53454700 | -2.53167300 | H               | -1.27751000 | -0.06232100 | 1.57278900  |
| H | -0.89201600 | -3.66227200 | -2.48099400 | <b>18-threo</b> |             |             |             |
| H | -0.00091300 | -3.29441100 | -0.97103900 | Rh              | 2.05266200  | -1.11868400 | -1.01418100 |
| C | -3.79679500 | -1.67360400 | -0.24508700 | Rh              | 2.82195500  | 0.11840900  | 0.94878300  |
| C | -5.15388400 | -1.94706000 | -0.56456900 | C               | 2.74104600  | 1.65576800  | -1.54428900 |
| C | -5.83783500 | -3.06543200 | -0.07498600 | O               | 2.28647800  | 0.60934800  | -2.12465800 |
| C | -5.13851100 | -3.93963400 | 0.74958000  | O               | 3.08827000  | 1.73484600  | -0.32585800 |
| C | -3.78902900 | -3.69906200 | 1.07579400  | C               | 4.90695000  | -1.27252600 | -0.58988500 |
| C | -3.11856600 | -2.58333100 | 0.58565900  | O               | 3.96659400  | -1.64399500 | -1.37698600 |
| C | -3.43048400 | -0.43700900 | -0.92225300 | O               | 4.74472600  | -0.55518900 | 0.43433700  |
| C | -4.57108900 | -0.05359100 | -1.60655200 | C               | 2.12426000  | -2.64772100 | 1.45703700  |
| H | -6.87792500 | -3.24790300 | -0.33042600 | O               | 1.84062900  | -2.75472900 | 0.21412100  |
| H | -5.63822600 | -4.81980000 | 1.14464300  | O               | 2.53698800  | -1.60244900 | 2.04641300  |
| H | -3.26403800 | -4.39874500 | 1.72071500  | C               | 6.29562100  | -1.76688700 | -0.92035500 |
| H | -2.07871800 | -2.42040500 | 0.85531700  | C               | 1.98741900  | -3.90185600 | 2.29104200  |
| H | -4.71930300 | 0.78598200  | -2.26877900 | C               | 2.86134200  | 2.91847200  | -2.36396500 |
| N | -5.60198900 | -0.94339400 | -1.40173600 | H               | 6.40762400  | -2.79056600 | -0.54427100 |
| C | -6.94163700 | -0.82931600 | -1.93893100 | H               | 6.44417100  | -1.78903700 | -2.00275800 |
| H | -7.21858800 | -1.73772800 | -2.48641100 | H               | 7.04615900  | -1.13480600 | -0.44232100 |
| H | -7.67765100 | -0.66180900 | -1.14273100 | H               | 2.24277800  | 3.69380100  | -1.89903600 |
| H | -6.97661800 | 0.01584600  | -2.62966800 | H               | 3.89842800  | 3.26896700  | -2.34439600 |
| C | -1.64817900 | 0.92893700  | 1.33488700  | H               | 2.54852400  | 2.74907900  | -3.39560100 |
| C | -0.66210700 | 1.95324600  | 1.27071100  | H               | 1.79114100  | -3.64383500 | 3.33372500  |
| H | -0.96028600 | 2.99051800  | 1.18220600  | H               | 1.19429100  | -4.53841600 | 1.89262400  |
| C | 0.69175000  | 1.73805600  | 1.44272300  | H               | 2.92930400  | -4.46166700 | 2.24581000  |
| O | 1.22700700  | 0.57247400  | 1.65709600  | C               | -2.18859000 | 0.36784800  | -0.62255900 |
| C | 1.56975800  | 2.96724600  | 1.53098800  | C               | -2.73653200 | 1.57060900  | -1.41281600 |
| O | 1.26277500  | 4.08366100  | 1.16639000  | C               | -1.89659500 | 2.35619600  | -2.21905100 |
| O | 2.75838300  | 2.68059900  | 2.12281000  | C               | -4.06392600 | 1.99833600  | -1.24914400 |
| C | 3.67979700  | 3.77833300  | 2.20458500  | C               | -2.37077200 | 3.49801100  | -2.86499200 |
| H | 4.54792600  | 3.39189800  | 2.73920700  | H               | -0.85307400 | 2.08822600  | -2.34547200 |
| H | 3.96114800  | 4.10775500  | 1.20094600  | C               | -4.54289600 | 3.13818500  | -1.89906800 |
| H | 3.23103800  | 4.61373400  | 2.74777500  | H               | -4.72788400 | 1.45012800  | -0.59234200 |
| C | -2.99595300 | 1.23013900  | 1.83155600  | C               | -3.70093800 | 3.89134000  | -2.71622800 |
| C | -3.55408100 | 2.52771500  | 1.79158200  | H               | -1.69275200 | 4.08238500  | -3.48105400 |
| C | -3.75755700 | 0.21390800  | 2.44364000  | H               | -5.57686700 | 3.43958400  | -1.75246700 |
| C | -4.81673500 | 2.78376700  | 2.31992400  | H               | -4.07212000 | 4.77886500  | -3.22148800 |
| H | -2.99463000 | 3.34404800  | 1.34934000  | C               | -0.95369700 | -0.23722300 | -1.32813400 |
| C | -5.01614200 | 0.47278800  | 2.98106500  | O               | 0.04248300  | -0.59624200 | -0.69675000 |
| H | -3.34821700 | -0.78814000 | 2.50805600  | O               | -1.13264600 | -0.43166300 | -2.62739400 |

|   |             |             |             |                    |             |             |             |
|---|-------------|-------------|-------------|--------------------|-------------|-------------|-------------|
| C | -0.16095700 | -1.17808600 | -3.38714300 | H                  | -5.86656800 | 1.96744000  | 4.22498400  |
| H | 0.74716000  | -0.58748400 | -3.52094700 | H                  | -1.22527900 | -0.00445300 | 1.29061300  |
| H | -0.63814000 | -1.36358100 | -4.34967600 | <b>19-threo-ts</b> |             |             |             |
| H | 0.05729000  | -2.13096100 | -2.89368800 | Rh                 | -4.08518700 | -0.03821800 | -1.05178200 |
| C | -2.94307000 | -2.10614600 | 0.09066400  | Rh                 | -3.00239600 | 0.00155700  | 1.14063200  |
| C | -4.02683000 | -2.94924800 | -0.28889600 | C                  | -2.42011900 | -2.34029500 | -0.48770200 |
| C | -4.18937900 | -4.25017600 | 0.20046900  | O                  | -3.22263300 | -1.87678300 | -1.36087300 |
| C | -3.22621500 | -4.73293500 | 1.07743800  | O                  | -2.08716000 | -1.77223100 | 0.60681300  |
| C | -2.12627600 | -3.93468400 | 1.44684900  | C                  | -5.57838100 | -1.34160300 | 1.06745700  |
| C | -1.97232800 | -2.63981700 | 0.96352100  | O                  | -5.65493500 | -0.98302000 | -0.14959700 |
| C | -3.13725100 | -0.83865800 | -0.59562200 | O                  | -4.57770500 | -1.11783300 | 1.81711900  |
| C | -4.26597700 | -1.00546200 | -1.36838100 | C                  | -4.73952800 | 2.26223100  | 0.58879100  |
| H | -5.03594000 | -4.86285100 | -0.09621500 | O                  | -4.92972100 | 1.77816600  | -0.57521200 |
| H | -3.32000500 | -5.73851700 | 1.47778800  | O                  | -4.06311200 | 1.72695400  | 1.52658800  |
| H | -1.38154400 | -4.33858500 | 2.12696100  | C                  | -6.76472500 | -2.05183500 | 1.67117200  |
| H | -1.10237700 | -2.06180500 | 1.25258100  | C                  | -5.35437900 | 3.61242800  | 0.87740600  |
| H | -4.72574100 | -0.32101100 | -2.06451400 | C                  | -1.78928700 | -3.67940900 | -0.77914500 |
| N | -4.81365700 | -2.25415200 | -1.18585500 | H                  | -7.38184700 | -1.31927500 | 2.20449400  |
| C | -6.04724500 | -2.73482700 | -1.77448600 | H                  | -7.37002700 | -2.51702600 | 0.89098500  |
| H | -5.88458700 | -3.69203300 | -2.28248400 | H                  | -6.42824600 | -2.79829600 | 2.39457500  |
| H | -6.82606100 | -2.86886700 | -1.01382200 | H                  | -0.79968100 | -3.51573900 | -1.21997700 |
| H | -6.39765600 | -2.00695200 | -2.50940900 | H                  | -1.66101800 | -4.24696600 | 0.14590800  |
| C | -1.74318500 | 0.84429200  | 0.84641300  | H                  | -2.39951500 | -4.23938200 | -1.49084900 |
| C | -0.75109600 | 1.97883700  | 0.80985000  | H                  | -4.61466300 | 4.38844000  | 0.64780400  |
| H | -1.08515900 | 2.96264300  | 0.50261400  | H                  | -6.23332400 | 3.77530700  | 0.25040900  |
| C | 0.53142500  | 1.88257300  | 1.24083100  | H                  | -5.61325200 | 3.69300500  | 1.93555300  |
| O | 1.08820500  | 0.77406500  | 1.71587200  | C                  | 2.96055700  | -0.39668700 | -0.59104900 |
| C | 1.33041000  | 3.16618900  | 1.26671600  | C                  | 2.59213300  | -1.78403900 | -1.14956500 |
| O | 1.08452100  | 4.16223000  | 0.60929700  | C                  | 1.79743500  | -1.94132600 | -2.29531100 |
| O | 2.35460700  | 3.10055600  | 2.14573700  | C                  | 3.00479600  | -2.95282700 | -0.48492000 |
| C | 3.19478200  | 4.26027400  | 2.19151900  | C                  | 1.46133500  | -3.20747400 | -2.77999700 |
| H | 3.93074800  | 4.05786100  | 2.97046200  | H                  | 1.42729300  | -1.07464200 | -2.82855900 |
| H | 3.68867800  | 4.40637600  | 1.22669700  | C                  | 2.66915100  | -4.21997500 | -0.96474400 |
| H | 2.61071800  | 5.15182900  | 2.43490500  | H                  | 3.59524800  | -2.87405800 | 0.41906300  |
| C | -2.92534700 | 1.17865100  | 1.76432700  | C                  | 1.90249400  | -4.35616700 | -2.12243800 |
| C | -3.50803400 | 2.45570900  | 1.81337200  | H                  | 0.85415300  | -3.28912700 | -3.67788700 |
| C | -3.42128900 | 0.20134400  | 2.64105100  | H                  | 3.01096300  | -5.10100800 | -0.42757800 |
| C | -4.56076300 | 2.73570200  | 2.68627900  | H                  | 1.64862900  | -5.34177200 | -2.50367700 |
| H | -3.13770100 | 3.24754000  | 1.17203200  | C                  | 2.77861400  | 0.71552400  | -1.65598300 |
| C | -4.47252000 | 0.47780400  | 3.51665500  | O                  | 2.20311400  | 1.77401900  | -1.48039700 |
| H | -2.97605600 | -0.78840400 | 2.64456200  | O                  | 3.42853700  | 0.43467300  | -2.80079400 |
| C | -5.05130700 | 1.74713700  | 3.54056300  | C                  | 3.45629600  | 1.48344000  | -3.78025300 |
| H | -4.99034500 | 3.73428700  | 2.70315400  | H                  | 2.44660100  | 1.72012300  | -4.12743400 |
| H | -4.83161100 | -0.30011600 | 4.18579500  | H                  | 4.05930500  | 1.09615300  | -4.60200200 |

|   |             |             |             |                 |             |             |             |
|---|-------------|-------------|-------------|-----------------|-------------|-------------|-------------|
| H | 3.91023500  | 2.38495300  | -3.36051300 | O               | -2.76096500 | 1.02192500  | -2.21640400 |
| C | 5.15641000  | 0.89908400  | 0.23948600  | C               | -0.78803300 | 1.98030200  | -3.12129700 |
| C | 6.54436500  | 0.57627300  | 0.25454800  | H               | 0.06070900  | 2.35560000  | -2.54259000 |
| C | 7.52904300  | 1.46532500  | 0.69974800  | H               | -0.38967800 | 1.51951700  | -4.03348600 |
| C | 7.11700300  | 2.72317800  | 1.12270000  | H               | -1.46095600 | 2.79599000  | -3.38837900 |
| C | 5.75525600  | 3.08054300  | 1.09546800  | O               | -0.83561200 | -0.05864600 | -1.82726700 |
| C | 4.77850700  | 2.19191600  | 0.65908500  | H               | -0.03963500 | 0.13721800  | -1.00282900 |
| C | 4.45747600  | -0.27429700 | -0.26292800 | <b>20-threo</b> |             |             |             |
| C | 5.43997200  | -1.19272400 | -0.55414700 | C               | -0.10558100 | 0.62853500  | -0.64709700 |
| H | 8.57857400  | 1.18482700  | 0.71188300  | C               | 0.09119200  | 2.15424500  | -0.68895200 |
| H | 7.85457400  | 3.43918600  | 1.47486300  | C               | 0.81281000  | 2.78082400  | -1.71843200 |
| H | 5.45867300  | 4.07278400  | 1.42422900  | C               | -0.35033500 | 2.96226800  | 0.37329000  |
| H | 3.74242500  | 2.50948700  | 0.64618100  | C               | 1.05462100  | 4.15538200  | -1.70593600 |
| H | 5.35131000  | -2.17547100 | -0.99085100 | H               | 1.19263000  | 2.19778300  | -2.54974100 |
| N | 6.68911300  | -0.70390300 | -0.24052400 | C               | -0.11585100 | 4.33874300  | 0.38541800  |
| C | 7.93712600  | -1.42951400 | -0.35272400 | H               | -0.87193400 | 2.51248300  | 1.20913700  |
| H | 8.66388400  | -0.86007200 | -0.94346100 | C               | 0.58435700  | 4.94519600  | -0.65698700 |
| H | 8.37119100  | -1.63392400 | 0.63394300  | H               | 1.61425400  | 4.60534000  | -2.52173600 |
| H | 7.75097300  | -2.38082300 | -0.85593600 | H               | -0.47565600 | 4.93285700  | 1.22157800  |
| C | 2.05826500  | -0.00300800 | 0.66888400  | H               | 0.76821000  | 6.01621800  | -0.64838700 |
| C | 0.55033100  | 0.07406800  | 0.39786100  | C               | 0.08799500  | -0.02726000 | -2.04162300 |
| H | -0.00847700 | -0.84719100 | 0.55140100  | O               | 0.72361400  | -1.03747300 | -2.25912500 |
| C | -0.19360500 | 1.21901200  | 0.70765200  | O               | -0.63251800 | 0.59649600  | -2.99687100 |
| O | -1.47063800 | 1.32217600  | 0.79153000  | C               | -0.61705900 | -0.03338700 | -4.28724200 |
| C | 0.47068500  | 2.59240300  | 0.82826000  | H               | 0.40209900  | -0.08906200 | -4.67958900 |
| O | 1.32625400  | 2.87232000  | 1.64134600  | H               | -1.23999000 | 0.59506900  | -4.92458900 |
| O | -0.05822900 | 3.46502100  | -0.04311000 | H               | -1.02816500 | -1.04444500 | -4.22294000 |
| C | 0.49866800  | 4.79014700  | 0.00385800  | C               | -2.05198200 | -1.14642200 | -0.20205000 |
| H | -0.05838800 | 5.36495400  | -0.73598700 | C               | -3.45052800 | -1.04124300 | 0.04859200  |
| H | 0.37567000  | 5.22053600  | 1.00079500  | C               | -4.27920200 | -2.15690900 | 0.21320200  |
| H | 1.56139100  | 4.76127800  | -0.25057600 | C               | -3.69702900 | -3.41403600 | 0.10256100  |
| C | 2.33039700  | -0.84771200 | 1.92107200  | C               | -2.32266700 | -3.54914800 | -0.17439300 |
| C | 1.65053700  | -2.04439500 | 2.20299700  | C               | -1.50059400 | -2.43813300 | -0.32966400 |
| C | 3.26215700  | -0.39047100 | 2.86628400  | C               | -1.53595600 | 0.20973900  | -0.29078200 |
| C | 1.90583800  | -2.76264100 | 3.37300100  | C               | -2.62910900 | 1.03143500  | -0.13879200 |
| H | 0.90897000  | -2.42956700 | 1.51139100  | H               | -5.34105200 | -2.04649200 | 0.41456100  |
| C | 3.52057500  | -1.10566800 | 4.03684400  | H               | -4.31163600 | -4.30204200 | 0.22199400  |
| H | 3.78539500  | 0.54349500  | 2.68879300  | H               | -1.89739700 | -4.54399500 | -0.27756300 |
| C | 2.84465600  | -2.29854600 | 4.29547000  | H               | -0.45342300 | -2.57191400 | -0.57578900 |
| H | 1.36131900  | -3.68413900 | 3.56401900  | H               | -2.68863400 | 2.10792700  | -0.18613900 |
| H | 4.24499200  | -0.72141300 | 4.75058000  | N               | -3.77710200 | 0.29931400  | 0.07570800  |
| H | 3.03819900  | -2.85450800 | 5.20930300  | C               | -5.09555300 | 0.84201800  | 0.32977200  |
| H | 2.38910200  | 0.99845300  | 0.92512600  | H               | -5.82413600 | 0.44252700  | -0.38515100 |
| C | -1.51055500 | 0.92577700  | -2.32105000 | H               | -5.43507400 | 0.60506000  | 1.34562300  |

|                      |             |             |             |   |             |             |             |
|----------------------|-------------|-------------|-------------|---|-------------|-------------|-------------|
| H                    | -5.06011000 | 1.92780600  | 0.21821500  | H | 2.76586900  | 4.87544200  | 0.01534000  |
| C                    | 0.96986900  | -0.03922800 | 0.34220300  | H | 1.36629500  | 4.45907600  | 1.01846300  |
| C                    | 2.37408700  | 0.26010500  | -0.12075000 | H | 2.99082900  | 4.44878100  | 1.74560700  |
| C                    | 3.39245300  | -0.58864900 | -0.34827500 | H | 3.93933300  | -4.18831500 | -0.88340300 |
| C                    | 3.43871700  | -2.07452900 | -0.21017200 | H | 2.19319400  | -4.32991800 | -0.62890900 |
| O                    | 4.44454000  | -2.68919900 | -0.53959600 | H | 2.81939200  | -3.94392000 | -2.26032300 |
| O                    | 2.35337500  | -2.66300300 | 0.30587300  | C | -2.15222900 | 0.82086100  | -0.71389700 |
| C                    | 2.42497600  | -4.09525400 | 0.42552400  | C | -2.17067400 | 2.26571700  | -0.37054200 |
| H                    | 1.47145700  | -4.39408200 | 0.86079000  | C | -3.28903400 | 2.83842800  | 0.28078700  |
| H                    | 2.56326800  | -4.55266500 | -0.55722000 | C | -1.11853800 | 3.14969800  | -0.70967800 |
| H                    | 3.25464200  | -4.38143000 | 1.07663800  | C | -3.35819200 | 4.20245800  | 0.56180000  |
| C                    | 0.77635800  | 0.32481400  | 1.81892900  | H | -4.11296500 | 2.20375800  | 0.57680900  |
| C                    | 1.49510800  | 1.35841000  | 2.43947800  | C | -1.19724000 | 4.51333600  | -0.43484000 |
| C                    | -0.10978300 | -0.42433800 | 2.60884800  | H | -0.22942200 | 2.77567200  | -1.19888900 |
| C                    | 1.32093200  | 1.64536400  | 3.79451100  | C | -2.31547400 | 5.05616100  | 0.20335900  |
| H                    | 2.20594000  | 1.94281000  | 1.86515400  | H | -4.23715600 | 4.59457100  | 1.06801200  |
| C                    | -0.28820600 | -0.13858800 | 3.96349900  | H | -0.37659300 | 5.15892800  | -0.73820800 |
| H                    | -0.66118000 | -1.24460700 | 2.16041800  | H | -2.37217600 | 6.12082900  | 0.41319400  |
| C                    | 0.42492400  | 0.90075100  | 4.56300000  | C | -0.93882200 | 0.30022100  | -1.35787300 |
| H                    | 1.89280300  | 2.45031300  | 4.24938000  | O | 0.22036500  | 0.53767000  | -0.95318400 |
| H                    | -0.97940200 | -0.73739700 | 4.55152900  | O | -1.20133600 | -0.42611100 | -2.45214700 |
| H                    | 0.29216900  | 1.12105300  | 5.61914300  | C | -0.15181600 | -1.02414500 | -3.22221100 |
| H                    | 0.80459300  | -1.10888700 | 0.26394900  | H | 0.53129300  | -0.25879900 | -3.60633500 |
| H                    | 2.61602700  | 1.30380400  | -0.30806000 | H | -0.65918600 | -1.51085900 | -4.05602000 |
| O                    | 4.59544900  | -0.10346300 | -0.77776300 | H | 0.41048200  | -1.74902400 | -2.63590600 |
| H                    | 5.15994000  | -0.89034200 | -0.91739300 | C | -3.70594500 | -1.24637300 | -1.24043100 |
| <b>21-erythro-ts</b> |             |             |             | C | -5.03948900 | -1.36545400 | -1.71633500 |
| Rh                   | 2.29711600  | 0.49727800  | -1.32130700 | C | -5.66243200 | -2.59939100 | -1.93080400 |
| Rh                   | 3.05131400  | -0.02769300 | 0.95126400  | C | -4.92302500 | -3.74772600 | -1.66782200 |
| C                    | 2.55236000  | 2.78270200  | 0.45806600  | C | -3.59590200 | -3.65977700 | -1.20426100 |
| O                    | 2.28805200  | 2.47882300  | -0.75567200 | C | -2.98393100 | -2.42756100 | -0.99433500 |
| O                    | 2.89504500  | 1.97528800  | 1.37729300  | C | -3.41169400 | 0.17522200  | -1.12380200 |
| C                    | 5.17255300  | 0.55655300  | -0.95699600 | C | -4.56738300 | 0.81496100  | -1.54404300 |
| O                    | 4.24579700  | 0.66201100  | -1.83027200 | H | -6.68586000 | -2.66142200 | -2.29015600 |
| O                    | 4.98231000  | 0.28805800  | 0.26399800  | H | -5.37443400 | -4.72359700 | -1.82444400 |
| C                    | 2.87324800  | -2.32791700 | -0.83430000 | H | -3.03730700 | -4.57130600 | -1.00982900 |
| O                    | 2.42923400  | -1.53193400 | -1.72642400 | H | -1.95915500 | -2.38973500 | -0.64108000 |
| O                    | 3.21716900  | -2.00202800 | 0.34725400  | H | -4.75971400 | 1.87241700  | -1.64887700 |
| C                    | 6.58519500  | 0.80283100  | -1.42898100 | N | -5.54022100 | -0.08879500 | -1.90027600 |
| C                    | 2.96637900  | -3.79266600 | -1.18965500 | C | -6.87604000 | 0.23464100  | -2.35559600 |
| C                    | 2.42440500  | 4.23960600  | 0.83631600  | H | -7.07432400 | -0.21910000 | -3.33363400 |
| H                    | 7.29795800  | 0.30711400  | -0.76725600 | H | -7.63407700 | -0.11904400 | -1.64574700 |
| H                    | 6.70860600  | 0.45705100  | -2.45790200 | H | -6.96640900 | 1.31882200  | -2.45042400 |
| H                    | 6.78191800  | 1.88125100  | -1.40828000 | C | -1.62100000 | 0.02394700  | 1.63563600  |

|                   |             |             |             |   |             |             |             |
|-------------------|-------------|-------------|-------------|---|-------------|-------------|-------------|
| C                 | -0.91497000 | -1.19987400 | 1.63488300  | H | 3.30233600  | -4.34429400 | -0.58341800 |
| H                 | -1.00480700 | 0.91548300  | 1.68225800  | H | 1.57271200  | -4.23845600 | -0.23566900 |
| H                 | -1.45326800 | -2.13840700 | 1.70439600  | H | 2.14781600  | -4.07981700 | -1.92679700 |
| C                 | -2.95146800 | 0.13511200  | 2.22940600  | C | -2.14366400 | 0.63600600  | -0.43044800 |
| C                 | -3.91891200 | -0.89031300 | 2.15945600  | C | -2.49408600 | 2.13686600  | -0.65318600 |
| C                 | -3.26319800 | 1.28966000  | 2.97903400  | C | -3.64236700 | 2.69550700  | -0.06270400 |
| C                 | -5.14103500 | -0.76142800 | 2.81238700  | C | -1.66334500 | 3.00021000  | -1.38543900 |
| H                 | -3.71552700 | -1.78434500 | 1.58080600  | C | -3.95460900 | 4.04635600  | -0.22000700 |
| C                 | -4.48233400 | 1.40889900  | 3.64388200  | H | -4.29827100 | 2.07491900  | 0.53344300  |
| H                 | -2.52614800 | 2.08312800  | 3.05444700  | C | -1.97490300 | 4.35281900  | -1.54394200 |
| C                 | -5.42847900 | 0.38526400  | 3.56052900  | H | -0.74403200 | 2.64282000  | -1.83601600 |
| H                 | -5.87298900 | -1.56164500 | 2.74072500  | C | -3.12508200 | 4.88472800  | -0.96500000 |
| H                 | -4.69121500 | 2.30026700  | 4.22967700  | H | -4.85020200 | 4.44143800  | 0.25232200  |
| H                 | -6.38042600 | 0.47634000  | 4.07706800  | H | -1.30766300 | 4.98628300  | -2.12256300 |
| C                 | 0.46801300  | -1.27037300 | 1.75172100  | H | -3.36869800 | 5.93665300  | -1.08665800 |
| O                 | 1.24109500  | -0.23106500 | 1.83832300  | C | -0.90719800 | 0.35135200  | -1.31139100 |
| C                 | 1.03573900  | -2.65804700 | 1.95909500  | O | 0.23472800  | 0.52785500  | -0.88748200 |
| O                 | 0.62554300  | -3.65930600 | 1.39796000  | O | -1.20351400 | -0.00878600 | -2.54849000 |
| O                 | 2.01522600  | -2.65865100 | 2.88049300  | C | -0.14422600 | -0.25667600 | -3.49568700 |
| C                 | 2.65152900  | -3.92430400 | 3.10907100  | H | 0.47975400  | 0.63672100  | -3.61261100 |
| H                 | 3.33166400  | -3.76191900 | 3.94542300  | H | -0.65261200 | -0.47488500 | -4.43446500 |
| H                 | 1.91103300  | -4.68988300 | 3.35425000  | H | 0.46036900  | -1.10641000 | -3.17487600 |
| H                 | 3.20847200  | -4.22509400 | 2.21788200  | C | -3.23993500 | -1.73688300 | -1.02972200 |
| <b>22-erythro</b> |             |             |             | C | -4.50940000 | -2.12926900 | -1.54281000 |
| Rh                | 2.27552700  | 0.44906000  | -1.35373300 | C | -4.84189300 | -3.46065200 | -1.81821900 |
| Rh                | 2.90086700  | 0.02829200  | 0.96978400  | C | -3.86816200 | -4.42665800 | -1.59527600 |
| C                 | 2.63949400  | 2.83071100  | 0.26903300  | C | -2.59491800 | -4.06688000 | -1.11354500 |
| O                 | 2.36126600  | 2.45809000  | -0.92442500 | C | -2.27272800 | -2.74326800 | -0.83492400 |
| O                 | 2.93598000  | 2.07348400  | 1.24202300  | C | -3.27319500 | -0.28976300 | -0.88059700 |
| C                 | 5.12552500  | 0.28212000  | -0.94299100 | C | -4.51547700 | 0.09711400  | -1.33121900 |
| O                 | 4.23029000  | 0.44321000  | -1.84569400 | H | -5.82378600 | -3.72995200 | -2.19725600 |
| O                 | 4.88597300  | 0.09161800  | 0.28023400  | H | -4.09218900 | -5.47063500 | -1.79668200 |
| C                 | 2.48402400  | -2.36655000 | -0.65883400 | H | -1.84931100 | -4.83849900 | -0.94465600 |
| O                 | 2.19087100  | -1.59547700 | -1.63696800 | H | -1.28868300 | -2.50882100 | -0.44517000 |
| O                 | 2.84377200  | -1.99009100 | 0.50021600  | H | -4.93306100 | 1.08664300  | -1.43100900 |
| C                 | 6.56410800  | 0.36021900  | -1.39667100 | N | -5.26849700 | -0.98941000 | -1.71688600 |
| C                 | 2.36996100  | -3.85533100 | -0.88233800 | C | -6.63101800 | -0.94899900 | -2.20550100 |
| C                 | 2.58701900  | 4.31795700  | 0.53537700  | H | -6.70593000 | -1.42827500 | -3.18857200 |
| H                 | 7.20138900  | -0.22530700 | -0.73090100 | H | -7.31663000 | -1.45667100 | -1.51592400 |
| H                 | 6.66107500  | 0.01245600  | -2.42753600 | H | -6.94309900 | 0.09308900  | -2.30277300 |
| H                 | 6.89145100  | 1.40583300  | -1.35598600 | C | -1.67043200 | 0.47762900  | 1.10702800  |
| H                 | 3.01857100  | 4.86777200  | -0.30525000 | C | -1.02396700 | -0.83443600 | 1.47037300  |
| H                 | 1.53817100  | 4.62160100  | 0.63280700  | H | -0.90047100 | 1.24292100  | 1.22349800  |
| H                 | 3.11158300  | 4.55899800  | 1.46149200  | H | -1.65110300 | -1.71124100 | 1.57437800  |



|                      |             |             |             |   |            |             |             |
|----------------------|-------------|-------------|-------------|---|------------|-------------|-------------|
| C                    | -2.76173700 | 0.76531600  | 2.13572400  | C | 3.50468900 | -0.30002800 | -0.66067100 |
| C                    | -3.86811900 | -0.08161900 | 2.31441500  | C | 4.74569600 | -1.24316900 | -0.69836600 |
| C                    | -2.63109200 | 1.87248700  | 2.98668200  | C | 5.59534100 | -1.39106500 | 0.41385200  |
| C                    | -4.82446500 | 0.19002800  | 3.29421100  | C | 5.03371900 | -2.03268500 | -1.82471900 |
| H                    | -3.98318100 | -0.95985600 | 1.68750300  | C | 6.69378300 | -2.25142300 | 0.38460100  |
| C                    | -3.58189400 | 2.14154400  | 3.97255800  | H | 5.39333900 | -0.84940700 | 1.32758300  |
| H                    | -1.77282100 | 2.52970300  | 2.87245300  | C | 6.12965200 | -2.89717400 | -1.85562900 |
| C                    | -4.68764100 | 1.30381300  | 4.12595500  | H | 4.39636600 | -1.99848500 | -2.70086500 |
| H                    | -5.67412000 | -0.47766600 | 3.41395500  | C | 6.97355500 | -3.00770100 | -0.75281200 |
| H                    | -3.45644100 | 3.00567700  | 4.62000900  | H | 7.32408100 | -2.33459000 | 1.26624900  |
| H                    | -5.43025300 | 1.51000100  | 4.89240300  | H | 6.31581100 | -3.48635400 | -2.74987400 |
| C                    | 0.27633000  | -0.95274100 | 1.84487700  | H | 7.82813500 | -3.67862200 | -0.77513700 |
| O                    | 1.13149100  | 0.06063400  | 1.90758200  | C | 2.93903700 | -0.30507200 | -2.09991700 |
| C                    | 0.72189400  | -2.31803000 | 2.31276100  | O | 2.05107800 | -1.03109800 | -2.50182900 |
| O                    | 0.23466700  | -3.37470100 | 1.94593400  | O | 3.59369100 | 0.54589400  | -2.90840300 |
| O                    | 1.71828800  | -2.23976600 | 3.21733200  | C | 3.14788100 | 0.57948400  | -4.27257400 |
| C                    | 2.23749100  | -3.49666300 | 3.66897100  | H | 3.26343200 | -0.40134200 | -4.74265600 |
| H                    | 2.98677800  | -3.24973400 | 4.42183000  | H | 3.78033000 | 1.31826500  | -4.76517100 |
| H                    | 1.44332000  | -4.11095300 | 4.10173200  | H | 2.09731900 | 0.87751200  | -4.32401500 |
| H                    | 2.69676700  | -4.03578600 | 2.83566200  | C | 3.06610600 | 2.33888000  | -0.53689000 |
| <b>23-erythro-ts</b> |             |             |             | C | 3.81980500 | 3.44869800  | -0.05910300 |
| Rh                   | -3.83296000 | 0.06727400  | 1.20456300  | C | 3.36199900 | 4.76981100  | -0.13128000 |
| Rh                   | -3.00020200 | 0.04548500  | -1.08149700 | C | 2.12515500 | 4.99251300  | -0.72416000 |
| C                    | -3.08235800 | 2.66462400  | 0.14291100  | C | 1.37094100 | 3.91918200  | -1.23823900 |
| O                    | -3.39025600 | 2.08232400  | 1.23766800  | C | 1.82715700 | 2.60827100  | -1.15291000 |
| O                    | -2.97898000 | 2.10946000  | -0.99791400 | C | 3.86478800 | 1.14417400  | -0.29942200 |
| C                    | -5.88441200 | 0.33734100  | -0.79761000 | C | 5.03659200 | 1.59933000  | 0.26065800  |
| O                    | -5.68665600 | 0.47577600  | 0.45250000  | H | 3.95663400 | 5.59404200  | 0.25269900  |
| O                    | -4.97589400 | 0.07632900  | -1.64715900 | H | 1.74194100 | 6.00644700  | -0.80156600 |
| C                    | -3.69016700 | -2.56071000 | 0.04869900  | H | 0.41689400 | 4.11646500  | -1.71999700 |
| O                    | -4.19164300 | -1.94586500 | 1.04651300  | H | 1.21652600 | 1.80991000  | -1.56018600 |
| O                    | -3.12138000 | -2.01842400 | -0.95442000 | H | 5.92323100 | 1.05457400  | 0.54209000  |
| C                    | -7.30083800 | 0.46439900  | -1.30260400 | N | 5.01840300 | 2.96858100  | 0.42532700  |
| C                    | -3.75288500 | -4.06931600 | 0.05798900  | C | 6.08413200 | 3.77060800  | 0.98787800  |
| C                    | -2.78559400 | 4.14430300  | 0.21034700  | H | 6.44056000 | 4.51381300  | 0.26442600  |
| H                    | -7.72109800 | -0.53924200 | -1.43610000 | H | 5.75006800 | 4.29497900  | 1.89148500  |
| H                    | -7.91599400 | 1.00760400  | -0.58281200 | H | 6.91782900 | 3.11725500  | 1.25404400  |
| H                    | -7.31097100 | 0.96638200  | -2.27310500 | C | 2.38968300 | -0.98090000 | 0.29457400  |
| H                    | -3.23871700 | 4.59076800  | 1.09753000  | C | 1.04275200 | -0.24708300 | 0.33166100  |
| H                    | -1.69824800 | 4.27828800  | 0.25998600  | H | 2.22355200 | -1.96093200 | -0.15422300 |
| H                    | -3.14394000 | 4.64077900  | -0.69484600 | H | 1.11152500 | 0.82906600  | 0.49392600  |
| H                    | -4.13563100 | -4.43461300 | -0.89965600 | C | 2.88219800 | -1.23087500 | 1.71806900  |
| H                    | -2.73497400 | -4.45578000 | 0.18231500  | C | 3.11635800 | -0.18862000 | 2.62908100  |
| H                    | -4.38003000 | -4.42538500 | 0.87675500  | C | 3.06904300 | -2.54822300 | 2.15930600  |

|                   |             |             |             |   |             |             |             |
|-------------------|-------------|-------------|-------------|---|-------------|-------------|-------------|
| C                 | 3.55407500  | -0.45769200 | 3.92680700  | H | -0.86184000 | 1.32043300  | 4.12399300  |
| H                 | 2.94807700  | 0.83988100  | 2.32779500  | C | -2.93077800 | -0.58249500 | -0.06693100 |
| C                 | 3.49891600  | -2.82156000 | 3.45874300  | C | -3.94509300 | 0.12395100  | -0.76884800 |
| H                 | 2.87493100  | -3.36855200 | 1.47324200  | C | -5.27330800 | -0.31544400 | -0.82052100 |
| C                 | 3.75235800  | -1.77495600 | 4.34643900  | C | -5.58796600 | -1.49084300 | -0.14776400 |
| H                 | 3.72985900  | 0.36524500  | 4.61543600  | C | -4.60091900 | -2.20863700 | 0.55681200  |
| H                 | 3.63643900  | -3.85251100 | 3.77504200  | C | -3.28366600 | -1.76737100 | 0.60283300  |
| H                 | 4.08933100  | -1.98305600 | 5.35882300  | C | -1.69836800 | 0.16340100  | -0.23335200 |
| C                 | -0.06087300 | -0.57527200 | -0.48848000 | C | -2.02378000 | 1.25211700  | -1.00731200 |
| O                 | -0.99588600 | 0.27358900  | -0.68786800 | H | -6.03258200 | 0.23949000  | -1.36468600 |
| C                 | -0.21111200 | -1.96877300 | -1.08846700 | H | -6.60948500 | -1.86116400 | -0.16686300 |
| O                 | 0.05464700  | -3.00187300 | -0.51011300 | H | -4.87598100 | -3.12568300 | 1.07107000  |
| O                 | -0.67718000 | -1.88884300 | -2.34220900 | H | -2.53548700 | -2.33788700 | 1.14334700  |
| C                 | -0.82217800 | -3.14094700 | -3.02739000 | H | -1.40617700 | 2.06856300  | -1.34687100 |
| H                 | -1.11915200 | -2.88268000 | -4.04396200 | N | -3.36591900 | 1.24271300  | -1.33514400 |
| H                 | 0.12747200  | -3.68154600 | -3.02730200 | C | -4.05056500 | 2.23086700  | -2.14088900 |
| H                 | -1.59403500 | -3.74404800 | -2.54428500 | H | -4.45902400 | 1.78352400  | -3.05568400 |
| O                 | -1.98130600 | -0.47387800 | 1.88893800  | H | -4.87325900 | 2.69232700  | -1.58136200 |
| C                 | -1.84219300 | 0.72794800  | 3.98736700  | H | -3.34218200 | 3.01315200  | -2.42212400 |
| H                 | -2.31546700 | 1.65112900  | 3.63436700  | C | 0.84055800  | 0.65119400  | -0.31391800 |
| H                 | -2.61818000 | 0.10984700  | 4.45183900  | C | 2.21403500  | 0.10693200  | 0.00604300  |
| H                 | -1.07130200 | 0.96813000  | 4.72102800  | C | 3.14977200  | -0.09019200 | -0.93625400 |
| C                 | -1.24641400 | 0.00082000  | 2.80452800  | C | 4.52078000  | -0.59230900 | -0.66753400 |
| O                 | 0.01897500  | -0.13162300 | 2.76015900  | O | 5.31185700  | -0.77263700 | -1.58449100 |
| H                 | 0.42551300  | -0.40445300 | 1.61329200  | O | 4.79976900  | -0.82274700 | 0.62167800  |
| <b>24-erythro</b> |             |             |             | C | 6.12201300  | -1.31721400 | 0.88891300  |
| C                 | -0.33524000 | -0.20970500 | 0.33926500  | H | 6.17176500  | -1.43973600 | 1.97087900  |
| C                 | -0.02689900 | -1.69457400 | -0.02194900 | H | 6.28220500  | -2.27400900 | 0.38482600  |
| C                 | 0.48435700  | -2.63620700 | 0.88135800  | H | 6.87478100  | -0.60221200 | 0.54646700  |
| C                 | -0.24908200 | -2.10439000 | -1.34653100 | C | 0.86224400  | 2.16799600  | -0.06830500 |
| C                 | 0.75184300  | -3.94666900 | 0.47333900  | C | 0.92210400  | 2.75533200  | 1.20516400  |
| H                 | 0.69148700  | -2.35410700 | 1.90606800  | C | 0.93228500  | 3.01716500  | -1.18590300 |
| C                 | 0.03132100  | -3.40587400 | -1.75656300 | C | 1.00076400  | 4.14197000  | 1.35049700  |
| H                 | -0.65950300 | -1.39777100 | -2.06110100 | H | 0.93713400  | 2.13453100  | 2.09312500  |
| C                 | 0.53033900  | -4.33873200 | -0.84509300 | C | 1.01630700  | 4.40243800  | -1.04261700 |
| H                 | 1.14151300  | -4.65836500 | 1.19687100  | H | 0.93596300  | 2.58025800  | -2.18179600 |
| H                 | -0.14961600 | -3.69259700 | -2.78924600 | C | 1.04147700  | 4.97357600  | 0.23066000  |
| H                 | 0.74174700  | -5.35709300 | -1.16036800 | H | 1.04084600  | 4.57177100  | 2.34828300  |
| C                 | -0.31026600 | -0.02926500 | 1.87374400  | H | 1.06789700  | 5.03299800  | -1.92670400 |
| O                 | 0.67156400  | -0.20334100 | 2.57561200  | H | 1.10492300  | 6.05200100  | 0.34875100  |
| O                 | -1.49061600 | 0.35117900  | 2.38440200  | H | 0.68882100  | 0.51794400  | -1.38809400 |
| C                 | -1.53154900 | 0.51467800  | 3.81083600  | H | 2.46506500  | -0.09361600 | 1.03880400  |
| H                 | -1.23397400 | -0.40953900 | 4.31266600  | O | 2.93509600  | 0.14933400  | -2.26240600 |
| H                 | -2.56697000 | 0.76469300  | 4.04200300  | H | 3.76570700  | -0.11136700 | -2.70969200 |

**25**

|    |             |             |             |
|----|-------------|-------------|-------------|
| Cl | 0.00159100  | -0.82511700 | -2.15955600 |
| Cl | -0.00156600 | -0.80233700 | 2.16660500  |
| Cu | 0.00011600  | -0.23444000 | 0.00044800  |
| C  | 5.72372900  | 1.99656600  | -0.00799600 |
| H  | 5.84161300  | 3.08537400  | -0.01376600 |
| H  | 6.22185400  | 1.59139400  | -0.89429000 |
| H  | 6.22087500  | 1.60086800  | 0.88310200  |
| C  | 4.24823900  | 1.64934700  | -0.00702700 |
| H  | 3.73047500  | 2.02151000  | -0.89545400 |
| H  | 3.72956900  | 2.03045600  | 0.87705900  |
| O  | 4.14790800  | 0.19460600  | 0.00033400  |
| C  | 2.93630600  | -0.33505800 | 0.00235800  |
| C  | 2.91611900  | -1.83233600 | 0.00992200  |
| H  | 3.92664900  | -2.24236100 | 0.01259100  |
| H  | 2.36362600  | -2.16547500 | 0.89549100  |
| H  | 2.36459000  | -2.17455700 | -0.87274100 |
| O  | 1.92843700  | 0.38223000  | -0.00168600 |
| C  | -5.72369000 | 1.99671700  | -0.00562200 |
| H  | -5.84149900 | 3.08554200  | -0.00911000 |
| H  | -6.22020100 | 1.59928300  | 0.88506000  |
| H  | -6.22251300 | 1.59334500  | -0.89233500 |
| C  | -4.24822800 | 1.64937700  | -0.00634600 |
| H  | -3.72891300 | 2.02886900  | 0.87806100  |
| H  | -3.73105900 | 2.02317200  | -0.89442400 |
| O  | -4.14799000 | 0.19464600  | -0.00176400 |
| C  | -2.93636500 | -0.33510000 | -0.00047100 |
| C  | -2.91641100 | -1.83240800 | 0.00531800  |
| H  | -3.92702100 | -2.24228700 | 0.00583700  |
| H  | -2.36351600 | -2.17378200 | -0.87681200 |
| H  | -2.36559400 | -2.16664900 | 0.89149600  |
| O  | -1.92846900 | 0.38203800  | -0.00356100 |

**C<sub>2</sub>H<sub>5</sub>OOCH<sub>3</sub>**

|   |             |             |             |
|---|-------------|-------------|-------------|
| C | 2.56827000  | -0.39990500 | -0.00003200 |
| H | 3.45499800  | 0.24352900  | 0.00000400  |
| H | 2.60686700  | -1.03981500 | -0.88758300 |
| H | 2.60689400  | -1.03995000 | 0.88742000  |
| C | 1.31296700  | 0.45301500  | 0.00005000  |
| H | 1.25418700  | 1.09812700  | -0.88271200 |
| H | 1.25422700  | 1.09800200  | 0.88290800  |
| O | 0.17868200  | -0.44254400 | 0.00001500  |
| C | -1.03855200 | 0.14699100  | -0.00003700 |
| C | -2.13861800 | -0.89045300 | 0.00000200  |
| H | -2.05069200 | -1.53399600 | -0.88172100 |

|   |             |             |             |
|---|-------------|-------------|-------------|
| H | -2.05114100 | -1.53340500 | 0.88220600  |
| H | -3.10829900 | -0.39155700 | -0.00038800 |
| O | -1.20261300 | 1.34769100  | -0.00001900 |

**26**

|   |             |             |             |
|---|-------------|-------------|-------------|
| C | 2.67096300  | -0.85883600 | 0.80485400  |
| C | 2.37948200  | -0.13398600 | 2.15103800  |
| C | 1.10126600  | -0.10209500 | 2.72687200  |
| C | 3.44744900  | 0.41686900  | 2.87791000  |
| C | 0.89187900  | 0.49941600  | 3.97053900  |
| H | 0.25157500  | -0.54093400 | 2.21843500  |
| C | 3.23951800  | 1.01154800  | 4.12173900  |
| H | 4.44786400  | 0.38172900  | 2.46058900  |
| C | 1.95759000  | 1.06155000  | 4.67242200  |
| H | -0.11194400 | 0.52307500  | 4.38601600  |
| H | 4.08307100  | 1.43743600  | 4.65891700  |
| H | 1.79247400  | 1.52926300  | 5.63940200  |
| C | 3.04137900  | -2.27871100 | 1.31053300  |
| O | 2.23214600  | -3.16002200 | 1.50966400  |
| O | 4.34724900  | -2.41170200 | 1.62053400  |
| C | 4.69862700  | -3.65100700 | 2.25988400  |
| H | 5.77399700  | -3.59376900 | 2.43170300  |
| H | 4.16226600  | -3.75575800 | 3.20659300  |
| H | 4.45350100  | -4.49986700 | 1.61652200  |
| C | 3.94519300  | 1.24618800  | -0.22909100 |
| C | 5.06008500  | 1.38397600  | -1.10572700 |
| C | 5.51843100  | 2.62565200  | -1.56127500 |
| C | 4.84101100  | 3.76013200  | -1.13008200 |
| C | 3.73585500  | 3.65448200  | -0.26240800 |
| C | 3.28598600  | 2.41968500  | 0.19063100  |
| C | 3.78243700  | -0.17347200 | 0.02774500  |
| C | 4.77786000  | -0.79564500 | -0.68984000 |
| H | 6.37377700  | 2.70223200  | -2.22678000 |
| H | 5.17057900  | 4.74016400  | -1.46408300 |
| H | 3.22935800  | 4.55808900  | 0.06618700  |
| H | 2.43801700  | 2.36528100  | 0.86419700  |
| H | -2.02794000 | 0.12976600  | 1.02116300  |
| H | 5.00750700  | -1.84743700 | -0.76825600 |
| N | 5.54737300  | 0.11964300  | -1.37394200 |
| C | 6.70146000  | -0.18292600 | -2.19505100 |
| H | 6.57399900  | 0.21604800  | -3.20804800 |
| H | 7.61753200  | 0.24043900  | -1.76506200 |
| H | 6.81524800  | -1.26696600 | -2.26166400 |
| C | 1.35882100  | -1.03708600 | -0.08630200 |
| C | 0.71798100  | 0.27693800  | -0.43911600 |

|              |             |             |             |   |             |             |             |
|--------------|-------------|-------------|-------------|---|-------------|-------------|-------------|
| H            | 0.65629300  | -1.61139200 | 0.51606400  | C | 0.68068700  | -3.61902000 | -1.79829600 |
| H            | 1.30921900  | 1.01486500  | -0.96562700 | H | 0.09478100  | -1.58167000 | -1.63424000 |
| C            | 1.59115100  | -1.85279700 | -1.36533100 | C | 3.01594900  | -4.10742200 | -1.46718100 |
| C            | 1.19614200  | -3.19860800 | -1.40554000 | H | 4.27361600  | -2.42741800 | -1.00803100 |
| C            | 2.14417700  | -1.29029100 | -2.52740000 | C | 1.71989600  | -4.54645000 | -1.74947200 |
| C            | 1.36117200  | -3.96245900 | -2.56206200 | H | -0.33579200 | -3.92873800 | -2.02253600 |
| H            | 0.76767000  | -3.64946100 | -0.51661900 | H | 3.83928600  | -4.81652500 | -1.43425600 |
| C            | 2.30562200  | -2.05194000 | -3.68614400 | H | 1.52570300  | -5.59968800 | -1.93505200 |
| H            | 2.44722700  | -0.24850600 | -2.53731800 | C | 3.01440100  | 0.09409500  | -2.47275300 |
| C            | 1.91701200  | -3.39234900 | -3.70829200 | O | 2.26171100  | 0.48039400  | -3.34122600 |
| H            | 1.04716200  | -5.00317000 | -2.56681300 | O | 4.32613700  | -0.12773300 | -2.69578500 |
| H            | 2.73026300  | -1.59211200 | -4.57508700 | C | 4.75231800  | 0.06466400  | -4.05593300 |
| H            | 2.03894600  | -3.98376200 | -4.61209200 | H | 5.82099800  | -0.15262300 | -4.05820800 |
| C            | -0.57290900 | 0.58056000  | -0.20097700 | H | 4.21849700  | -0.61823100 | -4.72185300 |
| O            | -1.43470500 | -0.31314600 | 0.36731000  | H | 4.56494400  | 1.09257200  | -4.37663200 |
| C            | -1.15165100 | 1.86996900  | -0.64466300 | C | 3.73809900  | -0.76719600 | 1.30939600  |
| O            | -2.35880500 | 2.14705100  | -0.63231200 | C | 4.83061000  | -0.15403900 | 1.98963600  |
| O            | -0.26330400 | 2.76016800  | -1.07032600 | C | 5.23881900  | -0.53773800 | 3.27224200  |
| C            | -0.78357000 | 4.01490800  | -1.56106300 | C | 4.53474100  | -1.56227900 | 3.89390900  |
| H            | 0.09275500  | 4.56668800  | -1.89900600 | C | 3.45330400  | -2.19009100 | 3.24479600  |
| H            | -1.48102700 | 3.83928800  | -2.38277400 | C | 3.05315900  | -1.80863800 | 1.96924100  |
| H            | -1.29441200 | 4.54873100  | -0.75656600 | C | 3.62666400  | -0.11575200 | 0.01653500  |
| Cl           | -3.65406900 | 1.15175300  | 2.01055500  | C | 4.63009800  | 0.82517000  | -0.01069300 |
| Cl           | -4.97929300 | 1.69324000  | -2.17156800 | H | 6.07767200  | -0.05437600 | 3.76527300  |
| Cu           | -4.05380300 | 1.11251300  | -0.23149200 | H | 4.82602100  | -1.88566700 | 4.88951100  |
| C            | -7.37390400 | -4.03745300 | 0.06513100  | H | 2.92667000  | -2.99694300 | 3.74759100  |
| H            | -6.86885000 | -4.97608600 | -0.18634500 | H | 2.22913000  | -2.32106200 | 1.48497700  |
| H            | -8.20713700 | -3.89743800 | -0.63052200 | H | -2.11520000 | -0.54380700 | -0.94470100 |
| H            | -7.77647800 | -4.12377300 | 1.07921800  | H | 4.89398600  | 1.51856700  | -0.79494300 |
| C            | -6.38566800 | -2.89252100 | -0.03286200 | N | 5.35575400  | 0.81699800  | 1.15992800  |
| H            | -5.97945500 | -2.77416600 | -1.04101300 | C | 6.50022900  | 1.65290600  | 1.45849900  |
| H            | -5.54918300 | -3.00033700 | 0.66313300  | H | 6.33051800  | 2.23471100  | 2.37201700  |
| O            | -7.10644700 | -1.67095300 | 0.31145700  | H | 7.40762300  | 1.05096000  | 1.59042200  |
| C            | -6.43537500 | -0.53373900 | 0.26603500  | H | 6.65825700  | 2.34685000  | 0.63034100  |
| C            | -7.24103300 | 0.67772300  | 0.62104800  | C | 1.26342000  | 0.56466400  | -0.73961500 |
| H            | -8.27144400 | 0.41362800  | 0.86137800  | C | 0.53258800  | 0.12103300  | 0.49924600  |
| H            | -6.76636700 | 1.17367800  | 1.47487900  | H | 0.59922900  | 0.44761300  | -1.59601300 |
| H            | -7.20893900 | 1.37059400  | -0.22706600 | H | 1.10880900  | -0.16525400 | 1.37191900  |
| O            | -5.23962400 | -0.51306500 | -0.04938500 | C | 1.54550400  | 2.07102300  | -0.62805600 |
| <b>27-ts</b> |             |             |             | C | 1.24422200  | 2.91242600  | -1.70911100 |
| C            | 2.55618700  | -0.31038700 | -1.04559100 | C | 2.05041000  | 2.65166700  | 0.54737700  |
| C            | 2.22071500  | -1.81533400 | -1.25012200 | C | 1.45872700  | 4.28932300  | -1.62594800 |
| C            | 0.93089500  | -2.26449800 | -1.56228700 | H | 0.84536100  | 2.48127200  | -2.62086500 |
| C            | 3.26324100  | -2.75758300 | -1.22412600 | C | 2.26153100  | 4.02878400  | 0.63196900  |

|            |             |             |             |   |             |             |             |
|------------|-------------|-------------|-------------|---|-------------|-------------|-------------|
| H          | 2.27485800  | 2.02930900  | 1.40777300  | H | -0.05466800 | 0.11256300  | 4.76431300  |
| C          | 1.96970400  | 4.85332200  | -0.45612400 | H | 3.98741100  | -1.33604200 | 4.51984900  |
| H          | 1.21454600  | 4.92113500  | -2.47582600 | H | 2.08028000  | -0.49937500 | 5.89009200  |
| H          | 2.64882200  | 4.45695900  | 1.55332700  | C | 1.20885500  | -2.53214800 | 0.44173300  |
| H          | 2.12935000  | 5.92639900  | -0.38887000 | O | 0.06500600  | -2.93051000 | 0.56083500  |
| C          | -0.80914200 | 0.12860200  | 0.63219600  | O | 2.25581200  | -3.37465500 | 0.38262400  |
| O          | -1.68774800 | 0.46735500  | -0.35951500 | C | 1.93427300  | -4.76953100 | 0.52344900  |
| C          | -1.48405800 | -0.16015700 | 1.90676600  | H | 2.88637200  | -5.29494700 | 0.44417900  |
| O          | -2.70507400 | 0.06739200  | 2.03992400  | H | 1.47100800  | -4.95619400 | 1.49575800  |
| O          | -0.75260400 | -0.64373300 | 2.89378500  | H | 1.24902200  | -5.08820300 | -0.26599800 |
| C          | -1.41940800 | -0.88019200 | 4.15267400  | C | 3.77199100  | 0.43720100  | -0.05396700 |
| H          | -0.64307200 | -1.26023600 | 4.81513000  | C | 4.79735000  | 0.35614000  | -1.03962000 |
| H          | -1.83835700 | 0.05217200  | 4.53808300  | C | 5.81419700  | 1.31057600  | -1.15701500 |
| H          | -2.21562300 | -1.61625800 | 4.02254200  | C | 5.80116200  | 2.37781200  | -0.26671400 |
| Cl         | -2.81811900 | -1.79794600 | -1.50585700 | C | 4.79907700  | 2.48483800  | 0.71756400  |
| Cl         | -4.06614200 | 2.59719100  | -0.92422300 | C | 3.79461200  | 1.53146900  | 0.83440600  |
| Cu         | -3.48172100 | 0.92808500  | 0.36957100  | C | 2.91868000  | -0.72235800 | -0.23786800 |
| C          | -7.48638100 | -2.82785100 | -0.88169200 | C | 3.45560400  | -1.41467300 | -1.29872200 |
| H          | -7.03164700 | -3.81593500 | -1.00802700 | H | 6.58553100  | 1.22405100  | -1.91730900 |
| H          | -7.71551100 | -2.42852700 | -1.87447200 | H | 6.57312100  | 3.13959300  | -0.33207200 |
| H          | -8.42226700 | -2.94515200 | -0.32571500 | H | 4.81001200  | 3.33065900  | 1.39911900  |
| C          | -6.51521600 | -1.92663600 | -0.14731800 | H | 3.03911600  | 1.63476000  | 1.60519800  |
| H          | -5.57887700 | -1.78182100 | -0.69153600 | H | 3.11778400  | -2.33132900 | -1.75795800 |
| H          | -6.27968700 | -2.29513300 | 0.85537600  | N | 4.57872900  | -0.78490700 | -1.78726000 |
| O          | -7.17257200 | -0.62267700 | 0.00624900  | C | 5.40115000  | -1.24179500 | -2.88775300 |
| C          | -6.45950800 | 0.37320500  | 0.48598900  | H | 5.44009700  | -0.49019800 | -3.68501400 |
| C          | -7.18382900 | 1.68359500  | 0.53763900  | H | 6.42503300  | -1.45295000 | -2.55580800 |
| H          | -8.22798400 | 1.57323500  | 0.24307900  | H | 4.97027900  | -2.15835600 | -3.29634400 |
| H          | -7.11266700 | 2.09357900  | 1.54986700  | C | 0.39426400  | -0.24385500 | -0.17877500 |
| H          | -6.66483300 | 2.37871700  | -0.13221000 | C | 0.37225400  | 1.22840900  | 0.11415500  |
| O          | -5.29317100 | 0.20788800  | 0.87385700  | H | -0.50637700 | -0.66893900 | 0.26202700  |
| <b>HCl</b> |             |             |             | H | 1.25350900  | 1.83876900  | -0.04204900 |
| Cl         | 0.00000000  | 0.00000000  | 0.07163400  | C | 0.27245600  | -0.47342200 | -1.69202900 |
| H          | 0.00000000  | 0.00000000  | -1.21777400 | C | -0.61177700 | -1.44804600 | -2.17992500 |
| <b>28</b>  |             |             |             | C | 0.98828800  | 0.29706600  | -2.62308400 |
| C          | 1.61393100  | -1.03285300 | 0.47453900  | C | -0.76851600 | -1.65590400 | -3.55239200 |
| C          | 1.73308400  | -0.80951100 | 2.00947700  | H | -1.17133600 | -2.05627400 | -1.47613700 |
| C          | 0.65900100  | -0.36506900 | 2.79342000  | C | 0.82800600  | 0.09430300  | -3.99418900 |
| C          | 2.92474100  | -1.16961300 | 2.65930400  | H | 1.67038500  | 1.06748600  | -2.27870700 |
| C          | 0.78785500  | -0.24847300 | 4.18004900  | C | -0.04963200 | -0.88413400 | -4.46557100 |
| H          | -0.28552300 | -0.09974500 | 2.33614300  | H | -1.46073700 | -2.41627000 | -3.90536600 |
| C          | 3.05064700  | -1.05893600 | 4.04337800  | H | 1.38562400  | 0.70999800  | -4.69521300 |
| H          | 3.76022400  | -1.53302200 | 2.07073500  | H | -0.17880600 | -1.03590600 | -5.53394200 |
| C          | 1.98251900  | -0.59190400 | 4.81168700  | C | -0.76631100 | 1.85987600  | 0.54089200  |

|              |             |             |             |    |             |             |             |
|--------------|-------------|-------------|-------------|----|-------------|-------------|-------------|
| O            | -1.88336600 | 1.21743300  | 0.82229500  | C  | -3.36111700 | -1.95874500 | 0.30139500  |
| C            | -0.70535400 | 3.35411400  | 0.75297800  | C  | -2.57162500 | -3.15020900 | 0.19564600  |
| O            | 0.28685000  | 4.03326900  | 0.57245300  | C  | -3.15199400 | -4.40296600 | -0.01887500 |
| O            | -1.88827600 | 3.84891300  | 1.16240500  | C  | -4.54044300 | -4.46478300 | -0.10695300 |
| C            | -1.92957900 | 5.27447700  | 1.32621700  | C  | -5.33984300 | -3.30575400 | 0.00516200  |
| H            | -2.95058000 | 5.50263000  | 1.63204800  | C  | -4.76810700 | -2.05884000 | 0.19984800  |
| H            | -1.21525700 | 5.59311100  | 2.09055800  | C  | -2.45997700 | -0.88260000 | 0.49228600  |
| H            | -1.69016500 | 5.77294600  | 0.38337400  | C  | -1.12941000 | -1.43731400 | 0.47660700  |
| Cl           | -3.94581500 | 2.58113100  | -1.99739900 | H  | -2.54486800 | -5.29750100 | -0.11383500 |
| Cu           | -3.29321300 | 1.28758800  | -0.41191400 | H  | -5.01924200 | -5.42702400 | -0.26521000 |
| C            | -6.92090900 | -3.60229900 | 0.03332000  | H  | -6.42006400 | -3.39801000 | -0.06137400 |
| H            | -7.72785900 | -3.60663800 | -0.70704100 | H  | -5.38654300 | -1.17303000 | 0.30009300  |
| H            | -7.36865600 | -3.64544000 | 1.03108900  | H  | -0.30120100 | -1.08554900 | 1.08833800  |
| H            | -6.31269300 | -4.50015200 | -0.11445800 | N  | -1.24209100 | -2.81573700 | 0.34154300  |
| C            | -6.08847800 | -2.34701600 | -0.13640700 | C  | -0.12684400 | -3.75210400 | 0.33857900  |
| H            | -6.67096900 | -1.43480100 | 0.01963400  | H  | 0.11495300  | -4.06320100 | -0.68417400 |
| H            | -5.62061500 | -2.28569500 | -1.12292400 | H  | 0.75390100  | -3.28285000 | 0.78605700  |
| O            | -5.03201400 | -2.39092900 | 0.86820500  | H  | -0.38337300 | -4.63436300 | 0.93295000  |
| C            | -4.16657100 | -1.38751900 | 0.89259200  | C  | -1.14828700 | 0.99372100  | -0.28769500 |
| C            | -3.09514700 | -1.54976600 | 1.92852300  | C  | -0.60580700 | -0.22483400 | -1.02905000 |
| H            | -3.45281200 | -2.16785300 | 2.75442800  | H  | -0.54787800 | 1.08903700  | 0.62266100  |
| H            | -2.22806300 | -2.04724500 | 1.47432200  | H  | -1.18467700 | -0.59825600 | -1.86623800 |
| H            | -2.77022800 | -0.56777700 | 2.27354900  | C  | -0.97132200 | 2.30863200  | -1.03620300 |
| O            | -4.26887400 | -0.44388000 | 0.10244800  | C  | -0.43050300 | 3.40946600  | -0.35252900 |
| <b>29-ts</b> |             |             |             | C  | -1.27754000 | 2.45919100  | -2.39897300 |
| C            | -2.60818800 | 0.61326900  | 0.25780000  | C  | -0.22326900 | 4.62948900  | -0.99721200 |
| C            | -2.94020000 | 1.42285900  | 1.51843100  | H  | -0.16610100 | 3.30595800  | 0.69640600  |
| C            | -3.21564300 | 2.79794400  | 1.44152700  | C  | -1.06749200 | 3.67836500  | -3.04519300 |
| C            | -2.91562200 | 0.82282700  | 2.78339300  | H  | -1.68645100 | 1.62343700  | -2.95386500 |
| C            | -3.45463100 | 3.54437500  | 2.59429800  | C  | -0.54389600 | 4.76908500  | -2.34831600 |
| H            | -3.25170400 | 3.29022600  | 0.47599100  | H  | 0.19658400  | 5.46596500  | -0.44455600 |
| C            | -3.15650800 | 1.56892900  | 3.93965400  | H  | -1.31039700 | 3.77226300  | -4.10057100 |
| H            | -2.71128200 | -0.24028900 | 2.86804300  | H  | -0.37942500 | 5.71607200  | -2.85580900 |
| C            | -3.42550900 | 2.93378400  | 3.85038400  | C  | 0.81177300  | -0.40061300 | -1.11995200 |
| H            | -3.66722400 | 4.60689800  | 2.50888700  | O  | 1.61249100  | 0.12221100  | -0.29197800 |
| H            | -3.13399200 | 1.07723000  | 4.90860900  | C  | 1.30763500  | -1.36936900 | -2.17438100 |
| H            | -3.61373800 | 3.51664500  | 4.74806100  | O  | 0.57690500  | -2.04333700 | -2.87687100 |
| C            | -3.65491700 | 0.76502600  | -0.87079100 | O  | 2.64988000  | -1.40224500 | -2.23364300 |
| O            | -3.46933600 | 0.41377800  | -2.01744200 | C  | 3.20354200  | -2.33666800 | -3.17449200 |
| O            | -4.82954800 | 1.26970400  | -0.44913100 | H  | 2.86510600  | -2.10282200 | -4.18739200 |
| C            | -5.84605600 | 1.38638200  | -1.46221100 | H  | 4.28436200  | -2.22666300 | -3.09094800 |
| H            | -6.70961400 | 1.81749900  | -0.95558700 | H  | 2.90099800  | -3.35569800 | -2.92004800 |
| H            | -5.50451300 | 2.03822800  | -2.26988500 | Cl | 3.28196200  | -2.64980600 | 1.75865000  |
| H            | -6.08657100 | 0.40316900  | -1.87468000 | Cu | 3.09583400  | -0.78393500 | 0.64102200  |

|           |            |             |             |    |             |             |             |
|-----------|------------|-------------|-------------|----|-------------|-------------|-------------|
| C         | 7.30575000 | 1.18042700  | -1.29992200 | H  | 6.64471000  | -2.96797600 | -1.11901800 |
| H         | 7.40324600 | 1.73440400  | -2.24053200 | H  | 5.40461000  | -0.81033700 | -1.11026500 |
| H         | 6.60370700 | 0.35694300  | -1.45816000 | H  | 0.46415400  | -1.24790000 | -1.29627000 |
| H         | 8.28594500 | 0.76768600  | -1.04008600 | N  | 1.47548000  | -2.78677700 | -0.28241900 |
| C         | 6.80425700 | 2.11336500  | -0.20850100 | C  | 0.47837500  | -3.84308000 | -0.25629500 |
| H         | 5.80926300 | 2.50109000  | -0.43740000 | H  | 0.48245500  | -4.36748500 | 0.70671000  |
| H         | 7.49224600 | 2.94533600  | -0.04255900 | H  | -0.51969000 | -3.42547400 | -0.40785500 |
| O         | 6.75788900 | 1.43799500  | 1.07815700  | H  | 0.66320300  | -4.57176000 | -1.05611900 |
| C         | 5.65932000 | 0.73569800  | 1.37121100  | C  | 1.03279700  | 0.89129300  | 0.28408700  |
| C         | 5.71978700 | 0.09253900  | 2.72836000  | C  | 0.58520300  | -0.52744100 | 0.73817700  |
| H         | 5.36066700 | -0.93925000 | 2.65599900  | H  | 0.48493700  | 1.08361200  | -0.64537600 |
| H         | 6.72857700 | 0.13245500  | 3.14215900  | H  | 1.06728400  | -0.83598900 | 1.66453800  |
| H         | 5.03396800 | 0.62431900  | 3.39841300  | C  | 0.68868200  | 2.03736100  | 1.22089000  |
| O         | 4.70591200 | 0.65779300  | 0.60000600  | C  | 0.19873900  | 3.23298700  | 0.67001200  |
| <b>30</b> |            |             |             | C  | 0.79191900  | 1.94766500  | 2.61870000  |
| C         | 2.54293900 | 0.71025200  | -0.20375200 | C  | -0.15796000 | 4.31160000  | 1.48057600  |
| C         | 2.89760200 | 1.74605300  | -1.27534800 | H  | 0.09824500  | 3.31674100  | -0.40896000 |
| C         | 3.17276100 | 3.07721200  | -0.92546100 | C  | 0.42748800  | 3.02277100  | 3.43110600  |
| C         | 2.89087900 | 1.40225200  | -2.63227900 | H  | 1.17569600  | 1.04233900  | 3.07304300  |
| C         | 3.43411300 | 4.03364100  | -1.90583300 | C  | -0.04483200 | 4.20974500  | 2.86783700  |
| H         | 3.18807500 | 3.36876200  | 0.12005800  | H  | -0.52955300 | 5.22715900  | 1.02713000  |
| C         | 3.15287100 | 2.35859600  | -3.61607600 | H  | 0.51537400  | 2.92974200  | 4.51055000  |
| H         | 2.68686500 | 0.37416500  | -2.91744500 | H  | -0.32593200 | 5.04482900  | 3.50434300  |
| C         | 3.42529400 | 3.67850900  | -3.25694800 | C  | -0.90895000 | 0.64505500  | 0.83794300  |
| H         | 3.64883700 | 5.05798600  | -1.61221200 | O  | -1.66289800 | -0.23253800 | -0.03507900 |
| H         | 3.14777300 | 2.06678700  | -4.66314600 | C  | -1.46036400 | -1.42444700 | 2.04003500  |
| H         | 3.63337700 | 4.42343700  | -4.02049400 | O  | -0.77086100 | -2.17276200 | 2.70089600  |
| C         | 3.52416600 | 0.71153500  | 0.98712400  | O  | -2.76088900 | -1.18939900 | 2.23464900  |
| O         | 3.25169100 | 0.34209800  | 2.11126200  | C  | -3.40087800 | -2.02324100 | 3.22231000  |
| O         | 4.76986100 | 1.07426700  | 0.62339000  | H  | -2.84051400 | -2.00043000 | 4.15954700  |
| C         | 5.77151500 | 0.94578900  | 1.64843500  | H  | -4.39871100 | -1.60525000 | 3.35160900  |
| H         | 6.69718700 | 1.29983600  | 1.19405200  | H  | -3.45928000 | -3.04567600 | 2.84162400  |
| H         | 5.50998300 | 1.55387000  | 2.51781200  | Cl | -3.35243800 | -3.46616800 | -0.45408500 |
| H         | 5.86577000 | -0.09900900 | 1.95503300  | Cu | -3.74178300 | -1.36485800 | -0.58519500 |
| C         | 3.48900500 | -1.75003900 | -0.73026800 | C  | -5.84697000 | 3.05228000  | 0.43460500  |
| C         | 2.81508000 | -3.00206700 | -0.50335900 | H  | -5.41201500 | 3.84591700  | 1.05218200  |
| C         | 3.51387600 | -4.21077900 | -0.50813300 | H  | -5.73524400 | 2.10562700  | 0.97051700  |
| C         | 4.89366000 | -4.17261200 | -0.73504100 | H  | -6.91230300 | 3.26555000  | 0.30046600  |
| C         | 5.57245100 | -2.95764800 | -0.94432900 | C  | -5.12889200 | 3.00797300  | -0.90409500 |
| C         | 4.88669600 | -1.74792800 | -0.93858500 | H  | -4.07408600 | 2.75058200  | -0.79068500 |
| C         | 2.50852200 | -0.73690400 | -0.67322600 | H  | -5.22206100 | 3.95127400  | -1.44551300 |
| C         | 1.16942800 | -1.38232400 | -0.45491700 | O  | -5.75005200 | 2.03845700  | -1.80344300 |
| H         | 3.00602700 | -5.15277200 | -0.32741200 | C  | -5.37070000 | 0.77190800  | -1.71435000 |
| H         | 5.45274200 | -5.10444000 | -0.74585800 | C  | -6.05278800 | -0.13354500 | -2.70025000 |

H -6.45960900 -1.00126100 -2.17189300  
H -6.84219800 0.39005000 -3.24112100  
H -5.30743400 -0.51049300 -3.40945000  
O -4.52363400 0.40328800 -0.89578300  
**31**  
C 0.78977400 0.76810600 0.16105300  
C 1.41974800 1.84652600 -0.71680800  
C 1.28894300 3.20427900 -0.38866200  
C 2.06514100 1.50861300 -1.91314900  
C 1.79791100 4.19470600 -1.22808800  
H 0.78654800 3.49207300 0.53033900  
C 2.57623900 2.49909900 -2.75470800  
H 2.16968900 0.46307200 -2.18602900  
C 2.44577000 3.84596600 -2.41527600  
H 1.68750600 5.24047800 -0.95311000  
H 3.07841100 2.21368000 -3.67547000  
H 2.84541600 4.61753800 -3.06806800  
C 0.99346600 1.01101700 1.66629600  
O 0.20763500 0.70517700 2.54054700  
O 2.22399200 1.49756800 1.92677000  
C 2.56494300 1.60230900 3.31868700  
H 3.57550100 2.01103600 3.34019400  
H 1.86898100 2.26770400 3.83623300  
H 2.53696400 0.61813200 3.79400600  
C 2.51484700 -1.40019000 -0.01578500  
C 2.12133600 -2.77489800 -0.02020900  
C 3.06017700 -3.81125900 -0.04094000  
C 4.40805000 -3.46358400 -0.03275100  
C 4.81457900 -2.11478000 -0.00943700  
C 3.88351400 -1.08247600 -0.00157800  
C 1.28992400 -0.65164400 -0.03100600  
C 0.25998400 -1.55139000 -0.00932000  
H 2.75441100 -4.85337300 -0.06237400  
H 5.15934400 -4.24846300 -0.04508800  
H 5.87552400 -1.87990200 0.00015300  
H 4.20162900 -0.04451700 0.01599300  
N 0.73005100 -2.84443300 0.00578700  
C -0.05217900 -4.06690400 -0.00229500  
H -1.05671900 -3.85633000 0.37039300  
H -0.12120200 -4.49820500 -1.00911100  
H 0.40937800 -4.80198000 0.66402700  
C -0.74569200 0.56145700 -0.23434900  
C -1.10330600 -0.92984200 0.11307500  
H -0.70588300 0.57461500 -1.32808600

H -1.48963100 -1.03726800 1.13034600  
C -1.76741000 1.60613400 0.17864300  
C -2.12571600 2.59259800 -0.75490000  
C -2.40432000 1.61898700 1.43031500  
C -3.07614400 3.56800900 -0.45027400  
H -1.65457700 2.59220400 -1.73434000  
C -3.36045600 2.58953200 1.73379500  
H -2.13542400 0.88337400 2.17846500  
C -3.69937600 3.56893000 0.79810900  
H -3.33341300 4.31953000 -1.19215400  
H -3.84063800 2.57916800 2.70903400  
H -4.44487300 4.32246700 1.03872200  
C -2.14211700 -1.45303500 -0.88033000  
O -2.03141500 -1.36128500 -2.08307800  
C -3.36032000 -2.17440400 -0.26820000  
O -3.30371500 -2.76361500 0.79390500  
O -4.43389200 -2.10147300 -1.05311400  
C -5.60590000 -2.78443300 -0.56769700  
H -5.89917600 -2.38850900 0.40792100  
H -6.37924200 -2.59550500 -1.31138600  
H -5.40818300 -3.85553900 -0.47663400  
**O<sub>2</sub>**  
O 0.00000000 0.00000000 0.60780600  
O 0.00000000 0.00000000 -0.60780600  
**H<sub>2</sub>O<sub>2</sub>**  
O -0.72030100 -0.14031200 -0.00002800  
H -1.03818800 0.77879800 0.00016900  
O 0.72030100 0.14031300 -0.00003600  
H 1.03818600 -0.77879800 0.00034500  
**32-Triplet**  
C -2.99904000 -0.32334600 -0.94231200  
C -3.89357500 0.86951900 -0.49849700  
C -3.35960400 2.11304700 -0.13007000  
C -5.29021300 0.74294800 -0.57300100  
C -4.20076400 3.18226000 0.18921800  
H -2.28828300 2.26622100 -0.08210500  
C -6.12799400 1.81211500 -0.25875900  
H -5.72118800 -0.20482500 -0.87669200  
C -5.58643500 3.03873700 0.12986400  
H -3.76270500 4.13262400 0.48430300  
H -7.20575700 1.68322400 -0.31706700  
H -6.23731000 3.87264200 0.37977900  
C -2.93498600 -0.08346200 -2.47591000  
O -2.11213200 0.62384300 -3.01885900



|   |             |             |             |                             |             |             |             |
|---|-------------|-------------|-------------|-----------------------------|-------------|-------------|-------------|
| O | -3.95785400 | -0.64805700 | -3.15067900 | H                           | 0.80036700  | 2.81833300  | 5.38339800  |
| C | -4.02719200 | -0.31044200 | -4.54648300 | H                           | -0.79103500 | 2.01395900  | 5.59733600  |
| H | -4.89497800 | -0.84713400 | -4.93162100 | H                           | 0.68630200  | 1.03004800  | 5.48771100  |
| H | -4.15454500 | 0.76802000  | -4.67193000 | Cl                          | 2.97454100  | 1.61726700  | -1.65323400 |
| H | -3.11704000 | -0.62317200 | -5.06459300 | Cu                          | 1.53875300  | 1.90210400  | 0.15883700  |
| C | -4.18826300 | -2.03890900 | 0.71992000  | C                           | 0.21756900  | 7.71225700  | -1.47908000 |
| C | -4.51837900 | -3.42207600 | 0.63071200  | H                           | 0.09805700  | 7.89609900  | -2.55206600 |
| C | -5.11027400 | -4.13028000 | 1.68291200  | H                           | 0.96429500  | 8.41212100  | -1.09082400 |
| C | -5.37241100 | -3.43642500 | 2.85850300  | H                           | -0.73871600 | 7.91482900  | -0.98654900 |
| C | -5.05320800 | -2.06941800 | 2.97655500  | C                           | 0.65027000  | 6.27621300  | -1.25892700 |
| C | -4.47112400 | -1.36870900 | 1.92696200  | H                           | 1.61030300  | 6.05216500  | -1.73232600 |
| C | -3.61304000 | -1.65869200 | -0.55747700 | H                           | -0.08577700 | 5.55655600  | -1.62794500 |
| C | -3.62073200 | -2.80209800 | -1.32238100 | O                           | 0.79504900  | 6.08417000  | 0.17896700  |
| H | -5.35573800 | -5.18435100 | 1.58673200  | C                           | 1.16319200  | 4.87975200  | 0.59663200  |
| H | -5.82838300 | -3.95597300 | 3.69690900  | C                           | 1.28793000  | 4.76633000  | 2.08759400  |
| H | -5.26461700 | -1.55170000 | 3.90793000  | H                           | 0.96949000  | 5.68543200  | 2.58176000  |
| H | -4.23748600 | -0.31631600 | 2.04237400  | H                           | 0.69616300  | 3.91039000  | 2.42768700  |
| H | -3.28060400 | -2.94832400 | -2.33634000 | H                           | 2.33583400  | 4.56184100  | 2.33669400  |
| N | -4.15564300 | -3.86448200 | -0.62689800 | O                           | 1.38953200  | 3.96656700  | -0.20038000 |
| C | -4.35365200 | -5.20389500 | -1.13880000 | Cl                          | 5.02235500  | -0.87766400 | -2.55853100 |
| H | -3.85435600 | -5.94274400 | -0.50102800 | Cl                          | 2.72198500  | 0.20621500  | 1.24443300  |
| H | -5.42016500 | -5.45534100 | -1.19497300 | Cu                          | 3.83089900  | -0.33709100 | -0.75413700 |
| H | -3.92661500 | -5.26769800 | -2.14196700 | C                           | 5.34748400  | -5.72437600 | 1.78803000  |
| C | -1.49848200 | -0.19065300 | -0.41778000 | H                           | 4.54325900  | -6.46146400 | 1.88478300  |
| C | -1.38576000 | -0.05059800 | 1.07282300  | H                           | 5.78407900  | -5.55985100 | 2.77811200  |
| H | -1.11003200 | 0.72040400  | -0.87389900 | H                           | 6.11842500  | -6.13955500 | 1.13141000  |
| H | -1.84523300 | -0.79176500 | 1.71576700  | C                           | 4.78458900  | -4.43684600 | 1.21984400  |
| C | -0.58473300 | -1.32890900 | -0.89399800 | H                           | 4.02034600  | -3.99322600 | 1.86389900  |
| C | 0.29266900  | -1.11098300 | -1.96730100 | H                           | 4.35510400  | -4.56956700 | 0.22337300  |
| C | -0.55052900 | -2.57855900 | -0.25272300 | O                           | 5.89239000  | -3.49253700 | 1.11462200  |
| C | 1.17556400  | -2.10802200 | -2.39254900 | C                           | 5.63224500  | -2.30293600 | 0.59803300  |
| H | 0.28168100  | -0.15387900 | -2.47817200 | C                           | 6.82581200  | -1.39932300 | 0.51086500  |
| C | 0.32465700  | -3.57848100 | -0.68003900 | H                           | 7.72088000  | -1.88692200 | 0.89878800  |
| H | -1.20392600 | -2.77362600 | 0.59107800  | H                           | 6.96218100  | -1.11677900 | -0.53853700 |
| C | 1.19157700  | -3.34837800 | -1.75057000 | H                           | 6.62429200  | -0.48397800 | 1.07805100  |
| H | 1.85455600  | -1.90931400 | -3.21695900 | O                           | 4.49079200  | -2.00234600 | 0.23440500  |
| H | 0.33092900  | -4.53795300 | -0.16797900 | <b>MECP<sub>32-33</sub></b> |             |             |             |
| H | 1.87730100  | -4.12452100 | -2.08112300 | C                           | -3.46831700 | 0.06434400  | -1.01655900 |
| C | -0.68387000 | 0.94536400  | 1.68928700  | C                           | -3.65039600 | 1.58529900  | -1.29089400 |
| O | -0.11196200 | 1.96405100  | 1.07159600  | C                           | -2.57045100 | 2.46857200  | -1.41331800 |
| C | -0.62611900 | 0.90743300  | 3.19545900  | C                           | -4.94228900 | 2.07875200  | -1.52733000 |
| O | -1.15304500 | 0.06473300  | 3.89519600  | C                           | -2.77968300 | 3.81774900  | -1.72240500 |
| O | 0.09118600  | 1.93869200  | 3.70593000  | H                           | -1.54964100 | 2.13130900  | -1.27611400 |
| C | 0.19809200  | 1.94304300  | 5.13628700  | C                           | -5.15259000 | 3.42093300  | -1.84237400 |

|   |             |             |             |    |             |             |             |
|---|-------------|-------------|-------------|----|-------------|-------------|-------------|
| H | -5.78889500 | 1.40513500  | -1.45735500 | H  | -1.00904600 | -5.53735600 | 0.46947700  |
| C | -4.07085900 | 4.30054600  | -1.93486400 | C  | -0.65862200 | 1.12231500  | 1.26220300  |
| H | -1.92488400 | 4.48424500  | -1.80057600 | O  | 0.21310500  | 1.53160500  | 0.36557000  |
| H | -6.16381200 | 3.77879700  | -2.01141500 | C  | -0.53406500 | 1.62329400  | 2.67507100  |
| H | -4.23282200 | 5.34805800  | -2.17340100 | O  | -1.35908900 | 1.41572000  | 3.54061700  |
| C | -3.39676400 | -0.51053000 | -2.45903900 | O  | 0.57985100  | 2.36295200  | 2.85821600  |
| O | -2.36299600 | -0.63701800 | -3.08338800 | C  | 0.69471100  | 2.96624500  | 4.16041200  |
| O | -4.60356600 | -0.75933000 | -2.99481600 | H  | 1.63911000  | 3.51085900  | 4.14472300  |
| C | -4.59138100 | -1.14459400 | -4.38204000 | H  | -0.14145300 | 3.65040400  | 4.33115900  |
| H | -5.63438600 | -1.33209100 | -4.63986000 | H  | 0.69676300  | 2.20414600  | 4.94417900  |
| H | -4.18116700 | -0.33872800 | -4.99608700 | Cl | 2.44434100  | -0.18291800 | -2.22969200 |
| H | -3.98800900 | -2.04445100 | -4.52538100 | Cu | 1.50718600  | 0.66120900  | -0.48289100 |
| C | -5.17941700 | 0.06476600  | 1.02469700  | C  | 4.96251700  | 5.64985000  | -1.63243300 |
| C | -6.12765300 | -0.88416400 | 1.50775200  | H  | 4.83533200  | 6.10749800  | -2.61863300 |
| C | -6.88788700 | -0.67361100 | 2.66761500  | H  | 6.01512200  | 5.37573100  | -1.51040800 |
| C | -6.68927100 | 0.511129700 | 3.36050500  | H  | 4.70415300  | 6.39198600  | -0.87042900 |
| C | -5.75681800 | 1.46855100  | 2.90518400  | C  | 4.06794600  | 4.43208000  | -1.51989700 |
| C | -5.00995000 | 1.25952800  | 1.75263900  | H  | 4.30577800  | 3.66418700  | -2.26199700 |
| C | -4.60943700 | -0.49440200 | -0.18997800 | H  | 3.00840800  | 4.68200100  | -1.61599500 |
| C | -5.22618400 | -1.70742900 | -0.36739800 | O  | 4.28465700  | 3.85998000  | -0.19776300 |
| H | -7.60736800 | -1.41358600 | 3.01069900  | C  | 3.50642500  | 2.84403500  | 0.15278100  |
| H | -7.26016200 | 0.70598700  | 4.26446500  | C  | 3.83769200  | 2.26730900  | 1.49579000  |
| H | -5.62446500 | 2.38856900  | 3.46647700  | H  | 4.51536900  | 2.92846200  | 2.04141000  |
| H | -4.31418500 | 2.02072600  | 1.41737400  | H  | 2.91569100  | 2.10935600  | 2.05962200  |
| H | -5.08736500 | -2.43783400 | -1.14988700 | H  | 4.32564200  | 1.29725000  | 1.34110800  |
| N | -6.13352600 | -1.95865700 | 0.64207600  | O  | 2.61588000  | 2.44646800  | -0.60580200 |
| C | -6.98124700 | -3.12712400 | 0.75526400  | Cl | 4.30681800  | -4.09890200 | -0.48149800 |
| H | -6.82724700 | -3.62868600 | 1.71838600  | Cl | 1.64092200  | -1.05329400 | 0.83200400  |
| H | -8.04202000 | -2.86076300 | 0.66496300  | Cu | 3.07292400  | -2.44338300 | 0.01086200  |
| H | -6.72728800 | -3.82810300 | -0.04387200 | C  | 8.91684800  | -1.08317100 | 2.14151000  |
| C | -2.04323400 | -0.26580400 | -0.38108700 | H  | 8.99186900  | -1.01809700 | 3.23234400  |
| C | -1.77184600 | 0.38388600  | 0.93035000  | H  | 9.54639900  | -0.30077100 | 1.70484600  |
| H | -1.29378200 | 0.05428700  | -1.10594100 | H  | 9.30661600  | -2.05590700 | 1.82612200  |
| H | -2.49802300 | 0.27049900  | 1.72995500  | C  | 7.47055300  | -0.91507300 | 1.71331400  |
| C | -1.79036900 | -1.76823000 | -0.13676600 | H  | 7.07338600  | 0.06563500  | 1.99167100  |
| C | -0.89096200 | -2.45522600 | -0.96703100 | H  | 6.82167100  | -1.67938000 | 2.15289300  |
| C | -2.39403100 | -2.46013200 | 0.92895000  | O  | 7.42614600  | -1.05278800 | 0.27556400  |
| C | -0.61876200 | -3.80658600 | -0.75574800 | C  | 6.25737200  | -0.76303300 | -0.32560600 |
| H | -0.40414200 | -1.93004300 | -1.78430700 | C  | 6.28154900  | -1.08336600 | -1.79393400 |
| C | -2.11678500 | -3.81228600 | 1.13815700  | H  | 7.28460300  | -0.97417900 | -2.21498500 |
| H | -3.08636600 | -1.95610200 | 1.59230400  | H  | 5.96176700  | -2.12650400 | -1.90549900 |
| C | -1.23084300 | -4.48917100 | 0.29845700  | H  | 5.56292800  | -0.45108400 | -2.31710400 |
| H | 0.08774600  | -4.31923000 | -1.40093700 | O  | 5.29287600  | -0.32158300 | 0.27686900  |
| H | -2.59361700 | -4.33217800 | 1.96425900  |    |             |             |             |

**33-Singlet**

|   |             |             |             |    |             |             |             |
|---|-------------|-------------|-------------|----|-------------|-------------|-------------|
| C | -3.48482900 | -0.00170000 | -1.02568100 | C  | -0.64584900 | -3.83811000 | -0.51063900 |
| C | -3.66632400 | 1.49497100  | -1.40643100 | H  | -0.43562000 | -2.02311000 | -1.64131400 |
| C | -2.58188500 | 2.36845800  | -1.57207000 | C  | -2.14574000 | -3.74309300 | 1.37840300  |
| C | -4.95417500 | 1.97140500  | -1.70155700 | H  | -3.09992400 | -1.85819400 | 1.73993500  |
| C | -2.78717200 | 3.68877200  | -1.98220700 | C  | -1.25822500 | -4.46418200 | 0.57900800  |
| H | -1.56656400 | 2.04139000  | -1.38600900 | H  | 0.05916800  | -4.38407500 | -1.13096100 |
| C | -5.15679400 | 3.28703400  | -2.11523000 | H  | -2.61403200 | -4.21529000 | 2.23820900  |
| H | -5.80324200 | 1.30410300  | -1.60085800 | H  | -1.03175400 | -5.50164500 | 0.80968900  |
| C | -4.07238800 | 4.15588200  | -2.25280700 | C  | -0.71822500 | 1.28558100  | 1.14174800  |
| H | -1.93018500 | 4.34789900  | -2.09379200 | O  | 0.19387000  | 1.55799600  | 0.26570700  |
| H | -6.16518000 | 3.63185900  | -2.32870100 | C  | -0.63566700 | 1.93736900  | 2.50772800  |
| H | -4.22834400 | 5.18295700  | -2.57200000 | O  | -1.49314500 | 1.83696900  | 3.36297400  |
| C | -3.40096000 | -0.67032700 | -2.42568700 | O  | 0.49529800  | 2.65151900  | 2.66773000  |
| O | -2.37034000 | -0.80842900 | -3.04803500 | C  | 0.62526400  | 3.29004800  | 3.94912000  |
| O | -4.60776800 | -0.98775800 | -2.93705900 | H  | 1.57570100  | 3.82312300  | 3.91494800  |
| C | -4.58829200 | -1.45106300 | -4.29998500 | H  | -0.20103600 | 3.98613900  | 4.11505500  |
| H | -5.62932500 | -1.65790000 | -4.54994200 | H  | 0.62911900  | 2.54462200  | 4.74867200  |
| H | -4.17932000 | -0.67944300 | -4.95709900 | Cl | 2.42068300  | -0.85306700 | -2.00902100 |
| H | -3.98017500 | -2.35446800 | -4.39056600 | Cu | 1.59066400  | 0.44158700  | -0.36766100 |
| C | -5.21202700 | 0.13747900  | 0.98870400  | C  | 4.96012600  | 5.53640500  | -1.99197100 |
| C | -6.16430600 | -0.77177600 | 1.53166000  | H  | 4.83374000  | 5.91455200  | -3.01211000 |
| C | -6.92652700 | -0.48089000 | 2.66665800  | H  | 6.01527600  | 5.28370600  | -1.84694100 |
| C | -6.72387400 | 0.75249200  | 3.27888800  | H  | 4.69581300  | 6.33616700  | -1.29280100 |
| C | -5.78780300 | 1.66997600  | 2.76577600  | C  | 4.07670600  | 4.32080200  | -1.78747000 |
| C | -5.03848000 | 1.38011900  | 1.63064400  | H  | 4.32939700  | 3.50355000  | -2.46930800 |
| C | -4.62993400 | -0.50436100 | -0.17272800 | H  | 3.01532000  | 4.55180100  | -1.91811100 |
| C | -5.24369400 | -1.73708900 | -0.26402900 | O  | 4.28169100  | 3.86189100  | -0.42363400 |
| H | -7.64874800 | -1.19025800 | 3.06062200  | C  | 3.59619100  | 2.78462700  | -0.03862400 |
| H | -7.29687600 | 1.00949100  | 4.16535500  | C  | 3.87155700  | 2.37622100  | 1.38025600  |
| H | -5.64848500 | 2.62433100  | 3.26517700  | H  | 4.56139000  | 3.06872300  | 1.86575400  |
| H | -4.33280500 | 2.10780700  | 1.24591200  | H  | 2.92147300  | 2.33888300  | 1.92222000  |
| H | -5.09434900 | -2.52034700 | -0.99132500 | H  | 4.28938500  | 1.36349900  | 1.37949600  |
| N | -6.16079300 | -1.91008700 | 0.74400100  | O  | 2.82651800  | 2.20241100  | -0.79838500 |
| C | -7.00216500 | -3.07362200 | 0.94017800  | Cl | 4.10255600  | -3.95799500 | -0.62556900 |
| H | -6.84364600 | -3.50388900 | 1.93562400  | Cl | 1.89754300  | -0.95102700 | 1.42711600  |
| H | -8.06288400 | -2.81672600 | 0.83348100  | Cu | 3.19855900  | -2.03668700 | -0.09392800 |
| H | -6.74663800 | -3.82646400 | 0.19180400  | C  | 8.87980100  | -0.91464900 | 2.25337200  |
| C | -2.06942900 | -0.28660600 | -0.33805700 | H  | 8.93682500  | -0.80198000 | 3.34153900  |
| C | -1.82449400 | 0.47935100  | 0.91448600  | H  | 9.50898400  | -0.14590200 | 1.79310200  |
| H | -1.31844700 | -0.00743700 | -1.07678900 | H  | 9.28261700  | -1.89680500 | 1.98695100  |
| H | -2.52301200 | 0.39078900  | 1.73817900  | C  | 7.43803300  | -0.78223900 | 1.79995400  |
| C | -1.82422100 | -1.76882000 | -0.01001400 | H  | 7.01678100  | 0.19661500  | 2.05149400  |
| C | -0.92082700 | -2.50113000 | -0.79712200 | H  | 6.79339200  | -1.54911900 | 2.23899800  |
| C | -2.42347200 | -2.40501600 | 1.09262200  | O  | 7.42335500  | -0.93624800 | 0.35876900  |

C 6.22516400 -0.94832900 -0.23792600  
C 6.31590000 -1.22894300 -1.71122800  
H 7.31871900 -1.03260400 -2.09530100  
H 6.06484000 -2.28603900 -1.86205500  
H 5.56553400 -0.63921000 -2.24262700  
O 5.18128500 -0.77177000 0.38131300

**34**

Cu -1.47745900 -0.25892100 0.00007500  
Cl -3.57212900 -0.24008000 -0.00014400  
C 4.53400100 -0.81051600 -0.00030700  
H 4.93439300 -1.82968300 -0.00019500  
H 4.90866700 -0.29341600 0.88835400  
H 4.90810200 -0.29382900 -0.88944600  
C 3.01994100 -0.86731400 0.00018600  
H 2.61848300 -1.36592100 0.88656600  
H 2.61791000 -1.36625000 -0.88574400  
O 2.53589700 0.51242500 0.00011500  
C 1.23178000 0.70754700 0.00005300  
C 0.82547800 2.15269000 -0.00005900  
H 0.20626700 2.35138800 0.88113700  
H 1.69628300 2.80931200 -0.00024000  
H 0.20602100 2.35120300 -0.88113000  
O 0.44025100 -0.24582400 0.00010100

**35**

C 2.36193300 -0.53789800 0.93683100  
C 2.26089500 0.51301000 2.08049700  
C 1.03308600 0.87445600 2.65521700  
C 3.43796600 1.03383100 2.64306800  
C 0.98599600 1.76517100 3.73107700  
H 0.09661700 0.47657600 2.28441600  
C 3.38864900 1.91922500 3.71862900  
H 4.39881800 0.74467200 2.23217300

C 2.15970400 2.29475600 4.26521700  
H 0.01999100 2.03321500 4.14994300  
H 4.31440300 2.31474100 4.12870900  
H 2.11943200 2.98693700 5.10222300  
C 2.44303000 -1.86458600 1.73862500  
O 1.48404100 -2.54246700 2.03751900  
O 3.69140700 -2.13958700 2.17040000  
C 3.79074900 -3.25379100 3.07467200  
H 4.84951200 -3.33060700 3.32421500  
H 3.19545900 -3.06853000 3.97242100  
H 3.43744000 -4.17120700 2.59687700  
C 3.99113400 0.95169500 -0.54840500  
C 5.08947700 0.65042200 -1.40339700  
C 5.76235600 1.62722700 -2.14396700  
C 5.31891100 2.94089800 -2.02893600  
C 4.23626200 3.26824100 -1.19058900  
C 3.57590700 2.29481800 -0.44901600  
C 3.56329700 -0.29928900 0.04660100  
C 4.40416400 -1.26291100 -0.46878400  
H 6.59975800 1.37272500 -2.78750800  
H 5.81697500 3.72460300 -2.59280500  
H 3.91192600 4.30232600 -1.11886200  
H 2.75683900 2.57306200 0.20479300  
H 4.42439400 -2.32481400 -0.27582600  
N 5.31954000 -0.71228700 -1.33434600  
C 6.37060400 -1.42591200 -2.03075800  
H 6.28084200 -1.29115800 -3.11485500  
H 7.36114300 -1.07697700 -1.71495700  
H 6.28644700 -2.49089600 -1.80482200  
C 1.01051200 -0.62950800 0.08445800

|    |             |             |             |              |             |             |             |
|----|-------------|-------------|-------------|--------------|-------------|-------------|-------------|
| C  | 0.63015000  | 0.63443900  | -0.60245800 | H            | -7.43366900 | 0.88400400  | 0.93712000  |
| H  | 0.22111800  | -0.89516200 | 0.78609600  | H            | -7.39410100 | 1.02954300  | -0.82920700 |
| H  | 1.31572300  | 1.09013100  | -1.30765800 | O            | -7.14486200 | -0.89654300 | -0.09258900 |
| C  | 1.02318100  | -1.72491300 | -0.99521100 | C            | -5.82449100 | -0.95787800 | -0.05642800 |
| C  | 0.27249400  | -2.89286000 | -0.78462300 | C            | -5.26489200 | -2.34344100 | -0.14298600 |
| C  | 1.71102500  | -1.58118200 | -2.21279300 | H            | -4.69616100 | -2.53793500 | 0.77325500  |
| C  | 0.23662900  | -3.90054400 | -1.74721400 | H            | -6.05666500 | -3.08315700 | -0.26640500 |
| H  | -0.26290400 | -3.01586700 | 0.15070900  | H            | -4.56460900 | -2.38386400 | -0.98417500 |
| C  | 1.66758500  | -2.58890700 | -3.17867200 | O            | -5.14501400 | 0.07101700  | 0.04408500  |
| H  | 2.27464700  | -0.67878400 | -2.42083900 | Cl           | -3.23613800 | -0.48518300 | 2.32653600  |
| C  | 0.93391600  | -3.75255100 | -2.94930300 | <b>36-ts</b> |             |             |             |
| H  | -0.34101200 | -4.80169000 | -1.55857300 | C            | 2.18129800  | -0.12999900 | 1.03677400  |
| H  | 2.20065100  | -2.45478600 | -4.11634000 | C            | 2.19428600  | 1.32995300  | 1.57293200  |
| H  | 0.89629100  | -4.53395800 | -3.70379600 | C            | 1.11128300  | 1.82104900  | 2.32144000  |
| C  | -0.58715000 | 1.27491700  | -0.43956100 | C            | 3.33653600  | 2.13561800  | 1.45553600  |
| O  | -1.43032300 | 0.93455200  | 0.48306200  | C            | 1.14809800  | 3.09898300  | 2.87999800  |
| C  | -0.85783200 | 2.48698600  | -1.30402500 | H            | 0.22479500  | 1.21764200  | 2.47392400  |
| O  | -0.10612800 | 2.87559300  | -2.17609200 | C            | 3.37314800  | 3.41336000  | 2.01660400  |
| O  | -2.00650800 | 3.09249200  | -0.96760800 | H            | 4.20591700  | 1.76429300  | 0.92777800  |
| C  | -2.36587500 | 4.21594900  | -1.78645300 | C            | 2.27680300  | 3.90468600  | 2.72530100  |
| H  | -1.58811300 | 4.98306800  | -1.74718000 | H            | 0.28751400  | 3.45652400  | 3.43810400  |
| H  | -2.50509800 | 3.89632300  | -2.82261400 | H            | 4.26771100  | 4.01987300  | 1.90123900  |
| H  | -3.30078600 | 4.59138800  | -1.37061800 | H            | 2.30486500  | 4.90012800  | 3.16053800  |
| Cl | -2.93428100 | -0.04777800 | -2.01609700 | C            | 2.21240300  | -0.93165900 | 2.36907500  |
| Cu | -3.14453400 | 0.18224400  | 0.18502000  | O            | 1.23529700  | -1.35858100 | 2.94533500  |
| C  | -9.26298700 | 0.21744700  | -0.04919800 | O            | 3.45187000  | -0.99704100 | 2.89318400  |
| H  | -9.76515000 | 1.18839200  | 0.01832200  | C            | 3.52485500  | -1.54797500 | 4.22084600  |
| H  | -9.60318900 | -0.40504300 | 0.78417400  | H            | 4.58169800  | -1.51860700 | 4.48729300  |
| H  | -9.56245600 | -0.26076200 | -0.98703500 | H            | 2.93506200  | -0.94342700 | 4.91446000  |
| C  | -7.76198700 | 0.42173300  | 0.00217700  | H            | 3.14926700  | -2.57434600 | 4.23434100  |

|   |             |             |             |           |             |             |             |
|---|-------------|-------------|-------------|-----------|-------------|-------------|-------------|
| C | 3.75784700  | 0.21379500  | -1.08899200 | H         | -0.46459100 | -5.03167500 | 0.80459900  |
| C | 4.78760300  | -0.57864100 | -1.67297700 | H         | 1.74137500  | -3.98720000 | -2.73763400 |
| C | 5.43166200  | -0.22927200 | -2.86359000 | H         | 0.59407600  | -5.70597400 | -1.34767100 |
| C | 5.02362200  | 0.94056400  | -3.49710700 | C         | -0.47608200 | 1.55833100  | -0.50132300 |
| C | 4.00534300  | 1.74098000  | -2.94712500 | O         | -1.24976400 | 1.62676800  | 0.48232400  |
| C | 3.38009700  | 1.39805500  | -1.75251500 | C         | -0.50857300 | 2.61292000  | -1.59468000 |
| C | 3.33848000  | -0.46427100 | 0.12393900  | O         | 0.35720200  | 2.72417500  | -2.44302800 |
| C | 4.11447500  | -1.60250800 | 0.19561400  | O         | -1.57969300 | 3.40334100  | -1.48993200 |
| H | 6.21912900  | -0.84874100 | -3.28342700 | C         | -1.68047200 | 4.44225900  | -2.47844900 |
| H | 5.49931500  | 1.23922900  | -4.42705000 | H         | -0.81590200 | 5.10863800  | -2.41866500 |
| H | 3.69915500  | 2.64771900  | -3.46017200 | H         | -1.73156200 | 4.00886200  | -3.48080900 |
| H | 2.61470100  | 2.04978300  | -1.34946600 | H         | -2.59878000 | 4.97845100  | -2.24125200 |
| H | 4.11061000  | -2.38484000 | 0.93900600  | Cl        | -1.95425100 | -0.51910100 | -1.52094000 |
| N | 4.98576800  | -1.68146400 | -0.86205900 | Cu        | -3.05289000 | 0.46386500  | 0.22081800  |
| C | 5.96082300  | -2.72942900 | -1.08670700 | C         | -8.91938700 | -0.94665500 | -1.20104100 |
| H | 5.79099000  | -3.21795500 | -2.05302100 | H         | -9.44829600 | -0.26464000 | -1.87540900 |
| H | 6.98118400  | -2.32836800 | -1.06992300 | H         | -9.41020700 | -0.91365800 | -0.22329600 |
| H | 5.86575200  | -3.47777700 | -0.29732100 | H         | -9.00668100 | -1.96228500 | -1.59993200 |
| C | 0.74937900  | -0.53979400 | 0.33200400  | C         | -7.46633900 | -0.52702100 | -1.09283000 |
| C | 0.37211000  | 0.42295000  | -0.73577100 | H         | -7.35227600 | 0.48006900  | -0.68209200 |
| H | 0.01793600  | -0.45165400 | 1.13541500  | H         | -6.95029900 | -0.56166600 | -2.05692300 |
| H | 0.87514900  | 0.38959300  | -1.69511500 | O         | -6.81317600 | -1.46391900 | -0.19151300 |
| C | 0.74715800  | -1.98954700 | -0.15622000 | C         | -5.52965500 | -1.24939800 | 0.07888000  |
| C | 0.09539200  | -2.96394000 | 0.61286900  | C         | -4.94530000 | -2.23002000 | 1.05290100  |
| C | 1.33789000  | -2.38108800 | -1.36626900 | H         | -4.64872600 | -1.67482900 | 1.95031300  |
| C | 0.04500200  | -4.29360200 | 0.19035700  | H         | -5.66000600 | -3.01340600 | 1.30869700  |
| H | -0.36376400 | -2.67756200 | 1.55280700  | H         | -4.04025200 | -2.66795500 | 0.61959400  |
| C | 1.28376700  | -3.70922100 | -1.79161400 | O         | -4.90928700 | -0.31831100 | -0.43512600 |
| H | 1.84095300  | -1.65130900 | -1.99252500 | Cl        | -3.75378600 | 1.05329500  | 2.22227800  |
| C | 0.63889000  | -4.67238300 | -1.01426000 | <b>37</b> |             |             |             |

|   |             |             |             |   |             |             |             |
|---|-------------|-------------|-------------|---|-------------|-------------|-------------|
| C | -0.38244400 | 0.12270300  | -1.06093200 | H | -1.19807000 | -0.64298800 | 2.22038000  |
| C | 0.92505200  | 0.77237300  | -1.64187300 | H | -1.28130800 | 2.75341800  | -1.75890200 |
| C | 1.51387900  | 0.32291100  | -2.83535800 | N | -2.06646400 | 3.20923900  | 0.16141100  |
| C | 1.59666900  | 1.77399500  | -0.92075300 | C | -2.53828300 | 4.55799500  | -0.07560600 |
| C | 2.71150800  | 0.87008500  | -3.29779900 | H | -3.62044300 | 4.62996900  | 0.08553400  |
| H | 1.04479800  | -0.46919000 | -3.40528300 | H | -2.03729300 | 5.27071500  | 0.59000000  |
| C | 2.80361000  | 2.31096800  | -1.37776700 | H | -2.32000600 | 4.83401900  | -1.10940900 |
| H | 1.18061200  | 2.14322100  | 0.00889200  | C | 0.06273600  | -1.23093000 | -0.35208800 |
| C | 3.36469200  | 1.86801500  | -2.57434300 | H | 0.67644200  | -1.72443700 | -1.10951400 |
| H | 3.13699100  | 0.50356400  | -4.22825200 | C | -1.05721100 | -2.24011100 | -0.07237900 |
| H | 3.29672400  | 3.08126400  | -0.79043200 | C | -2.40338200 | -1.90571400 | 0.12224700  |
| H | 4.29913800  | 2.28913700  | -2.93544600 | C | -0.71549000 | -3.60245800 | -0.09815000 |
| C | -1.23636100 | -0.36106100 | -2.27385400 | C | -3.36981600 | -2.89902300 | 0.30943400  |
| O | -0.93558900 | -1.31307100 | -2.96521100 | H | -2.71710000 | -0.86898200 | 0.12258300  |
| O | -2.33232000 | 0.37990200  | -2.51476900 | C | -1.67399600 | -4.59386400 | 0.09729200  |
| C | -3.12987900 | -0.06111600 | -3.62743300 | H | 0.31776000  | -3.88604500 | -0.27908800 |
| H | -3.96934300 | 0.63330800  | -3.67424800 | C | -3.01054500 | -4.24516600 | 0.30561100  |
| H | -2.54939100 | -0.03085700 | -4.55316900 | H | -4.40694100 | -2.61015800 | 0.45963500  |
| H | -3.48063600 | -1.08246400 | -3.46048500 | H | -1.37803900 | -5.63942500 | 0.07516300  |
| C | -1.57766700 | 1.23016200  | 1.17050100  | H | -3.76270100 | -5.01566700 | 0.45344000  |
| C | -2.15547900 | 2.52399600  | 1.35575300  | C | 2.52271000  | -0.96639000 | 0.37243700  |
| C | -2.70013900 | 2.95935900  | 2.56873200  | O | 2.93862300  | -1.64261600 | -0.53773100 |
| C | -2.67344000 | 2.07943400  | 3.64230100  | C | 3.46868200  | -0.10538900 | 1.23921500  |
| C | -2.12042300 | 0.79360900  | 3.49450800  | O | 3.07712300  | 0.75436100  | 1.99961700  |
| C | -1.58421400 | 0.36492900  | 2.28668600  | O | 4.74625700  | -0.42414300 | 1.02479300  |
| C | -1.12643800 | 1.16806100  | -0.21317600 | C | 5.70353900  | 0.34021000  | 1.77848300  |
| C | -1.45184800 | 2.39390300  | -0.75426700 | H | 6.67814400  | -0.06012000 | 1.50045800  |
| H | -3.12967200 | 3.95250100  | 2.66619300  | H | 5.63165800  | 1.39987000  | 1.51916500  |
| H | -3.08541500 | 2.38434500  | 4.60019100  | H | 5.52577200  | 0.22141200  | 2.85054400  |
| H | -2.11424400 | 0.11437100  | 4.34238700  | C | 1.05201300  | -0.92399800 | 0.81011800  |

|           |            |             |             |   |             |             |             |
|-----------|------------|-------------|-------------|---|-------------|-------------|-------------|
| H         | 0.84372800 | 0.01452900  | 1.31669300  | H | 7.90214100  | 1.30911400  | -1.63799800 |
| Cl        | 1.06018400 | -2.15296300 | 2.17907400  | H | 7.34945300  | 3.64993200  | -1.00828700 |
| <b>38</b> |            |             |             | H | 5.27032900  | 4.16103600  | 0.24053700  |
| C         | 2.86518500 | -0.74760500 | 0.81492600  | H | 3.69942400  | 2.37176100  | 0.88345100  |
| C         | 2.67235000 | 0.05037300  | 2.13912400  | H | -0.88667900 | 2.55841400  | 0.27676000  |
| C         | 1.40794500 | 0.45012000  | 2.59616500  | H | 4.93041500  | -2.49341600 | -0.45452100 |
| C         | 3.77905100 | 0.27258700  | 2.97505600  | N | 6.16196100  | -0.83200700 | -0.95182200 |
| C         | 1.26574800 | 1.09598200  | 3.82715300  | C | 7.25378100  | -1.52245500 | -1.60643900 |
| H         | 0.51596100 | 0.26531000  | 2.01248400  | H | 7.40745100  | -1.13530700 | -2.62041400 |
| C         | 3.63504900 | 0.91149900  | 4.20614500  | H | 8.18893500  | -1.41086500 | -1.04392500 |
| H         | 4.76163000 | -0.05600100 | 2.65536400  | H | 7.01173500  | -2.58516400 | -1.67457300 |
| C         | 2.37602100 | 1.33412400  | 4.63635400  | C | 1.68341200  | -0.48742100 | -0.23757700 |
| H         | 0.27466700 | 1.40646400  | 4.14773600  | C | 1.64818000  | 0.94493500  | -0.70209300 |
| H         | 4.51088700 | 1.07742900  | 4.82822200  | H | 0.75493000  | -0.72788200 | 0.27814400  |
| H         | 2.26185500 | 1.83611800  | 5.59363100  | H | 2.48652400  | 1.29466100  | -1.29143500 |
| C         | 2.68816400 | -2.19950900 | 1.33153000  | C | 1.75332700  | -1.41461700 | -1.45974000 |
| O         | 1.62191200 | -2.77335500 | 1.40575900  | C | 0.87194700  | -2.50299100 | -1.54575700 |
| O         | 3.82926400 | -2.73840400 | 1.80801700  | C | 2.64514700  | -1.20278300 | -2.52385900 |
| C         | 3.67843600 | -4.00960500 | 2.46244900  | C | 0.89745300  | -3.36611200 | -2.64285500 |
| H         | 4.68218800 | -4.29172400 | 2.78190900  | H | 0.16397600  | -2.66794300 | -0.74216200 |
| H         | 3.01217200 | -3.91743700 | 3.32415600  | C | 2.66773100  | -2.06098500 | -3.62553100 |
| H         | 3.26869100 | -4.75240900 | 1.77314100  | H | 3.32924500  | -0.36122300 | -2.50534400 |
| C         | 4.88425400 | 0.79154000  | -0.01550300 | C | 1.79784000  | -3.15021900 | -3.68830900 |
| C         | 6.08827700 | 0.52952400  | -0.73052300 | H | 0.21030000  | -4.20810100 | -2.67917900 |
| C         | 6.98802000 | 1.53739100  | -1.09699900 | H | 3.36584800  | -1.87226500 | -4.43740500 |
| C         | 6.67238800 | 2.84323400  | -0.74078700 | H | 1.81656900  | -3.81917800 | -4.54496600 |
| C         | 5.48871500 | 3.13216000  | -0.03292800 | C | 0.68368000  | 1.85812200  | -0.51669600 |
| C         | 4.59997800 | 2.12775900  | 0.33157900  | O | -0.46803200 | 1.66879300  | 0.21833700  |
| C         | 4.22905400 | -0.48708600 | 0.19481700  | C | 0.76256000  | 3.25940100  | -1.00812300 |
| C         | 5.05042000 | -1.42263200 | -0.39138600 | O | -0.09087100 | 4.07758300  | -0.69242300 |



|    |             |             |             |              |             |             |             |
|----|-------------|-------------|-------------|--------------|-------------|-------------|-------------|
| O  | 1.82343300  | 3.53153700  | -1.77358400 | H            | -2.17820300 | -4.33832000 | 1.58582300  |
| C  | 1.93472500  | 4.89455500  | -2.22019600 | H            | -0.68900400 | -3.36928900 | 1.88201700  |
| H  | 2.86006800  | 4.93410100  | -2.79419300 | H            | -3.76446100 | 0.98504000  | 4.44794200  |
| H  | 1.07850900  | 5.16018100  | -2.84541500 | H            | -4.09820500 | 2.55361100  | 3.70522300  |
| H  | 1.98047900  | 5.57346800  | -1.36495800 | H            | -5.42554500 | 1.36731700  | 3.92970000  |
| Rh | -2.42614700 | 0.39619700  | -0.01560900 | <b>39-ts</b> |             |             |             |
| Rh | -4.54633700 | -0.73183400 | -0.01830300 | C            | 3.26668300  | -0.62303400 | 0.95806600  |
| C  | -2.93590800 | -1.21686900 | -2.37457700 | C            | 3.29562300  | 0.40073300  | 2.12936300  |
| O  | -2.05531200 | -0.45457800 | -1.85671600 | C            | 2.12677300  | 0.90868600  | 2.71485000  |
| O  | -4.05182900 | -1.53290600 | -1.84867200 | C            | 4.53104500  | 0.74823300  | 2.70020700  |
| C  | -4.59246900 | 1.91014400  | -1.21686400 | C            | 2.20053300  | 1.76660900  | 3.81570000  |
| O  | -3.34745300 | 1.99023300  | -0.95097700 | H            | 1.14826100  | 0.65561800  | 2.32376500  |
| O  | -5.34730900 | 0.91976200  | -0.95956800 | C            | 4.60169000  | 1.60128500  | 3.80087800  |
| C  | -4.05901100 | 0.90213100  | 2.33178000  | H            | 5.44434000  | 0.34745400  | 2.27375600  |
| O  | -2.93108800 | 1.20508500  | 1.81817900  | C            | 3.43368500  | 2.11987500  | 4.36286100  |
| O  | -4.93086800 | 0.13560700  | 1.81413600  | H            | 1.28036100  | 2.15455900  | 4.24576500  |
| C  | -2.39325500 | -2.23670100 | 1.21189900  | H            | 5.57208800  | 1.85939900  | 4.21756100  |
| O  | -3.63215400 | -2.31573900 | 0.93203800  | H            | 3.48506600  | 2.78712800  | 5.21959800  |
| O  | -1.63015600 | -1.25248400 | 0.93134500  | C            | 3.31309700  | -1.95803800 | 1.74804500  |
| C  | -5.21570600 | 3.10799700  | -1.89776200 | O            | 2.33376500  | -2.52745800 | 2.18161800  |
| C  | -4.36891300 | 1.49423500  | 3.68857500  | O            | 4.56821000  | -2.38123500 | 2.01613500  |
| C  | -2.62561900 | -1.77517000 | -3.74465000 | C            | 4.65298100  | -3.51163300 | 2.89875400  |
| C  | -1.77667600 | -3.39378600 | 1.96281900  | H            | 5.71887900  | -3.71662600 | 3.00648200  |
| H  | -5.10589300 | 3.98892900  | -1.25672300 | H            | 4.20715600  | -3.27309500 | 3.86809300  |
| H  | -4.68356700 | 3.31554500  | -2.83164200 | H            | 4.13437800  | -4.37458600 | 2.47292100  |
| H  | -6.27213500 | 2.92833100  | -2.10246100 | C            | 4.95098400  | 0.81757500  | -0.53155200 |
| H  | -3.33395100 | -2.56265300 | -4.00782800 | C            | 5.98215000  | 0.47719600  | -1.45453200 |
| H  | -2.69477500 | -0.96784300 | -4.48276100 | C            | 6.70834400  | 1.43699000  | -2.16923600 |
| H  | -1.60038000 | -2.15495400 | -3.76557500 | C            | 6.39315400  | 2.77393400  | -1.95597000 |
| H  | -2.05746900 | -3.31378700 | 3.02003900  | C            | 5.37807200  | 3.13990200  | -1.04980200 |

|   |             |             |             |    |             |             |             |
|---|-------------|-------------|-------------|----|-------------|-------------|-------------|
| C | 4.66094200  | 2.18352100  | -0.34029000 | O  | -0.53621700 | 1.04414100  | 0.72424300  |
| C | 4.44369200  | -0.42750900 | 0.01580500  | C  | 0.15879400  | 2.76539700  | -0.72777600 |
| C | 5.17131200  | -1.42199800 | -0.59492000 | O  | -0.81156900 | 3.44677800  | -0.40400900 |
| H | 7.49151100  | 1.14967200  | -2.86550000 | O  | 1.06972400  | 3.18759700  | -1.61791300 |
| H | 6.93778300  | 3.54521200  | -2.49407600 | C  | 0.85853300  | 4.49648900  | -2.16371400 |
| H | 5.15452400  | 4.19277200  | -0.89887600 | H  | 1.69709400  | 4.66801700  | -2.83894500 |
| H | 3.88511300  | 2.48819500  | 0.35284300  | H  | -0.08806600 | 4.53805800  | -2.71009100 |
| H | -1.72240800 | 2.12546300  | 0.79314600  | H  | 0.84575300  | 5.24817800  | -1.36952500 |
| H | 5.10688200  | -2.49181600 | -0.46656900 | Rh | -2.43951500 | -0.05953400 | 0.18048700  |
| N | 6.09412800  | -0.89899400 | -1.47571200 | Rh | -4.82193500 | -0.19879300 | -0.21072300 |
| C | 7.03713900  | -1.65688300 | -2.27018700 | C  | -3.35982400 | -2.62165100 | -0.73833300 |
| H | 6.89041100  | -1.46803500 | -3.34047500 | O  | -2.28798800 | -1.97522400 | -0.50263500 |
| H | 8.07132200  | -1.40059500 | -2.00901300 | O  | -4.54967600 | -2.16384100 | -0.66609800 |
| H | 6.88408600  | -2.72178000 | -2.08241300 | C  | -3.28894800 | 0.59965800  | -2.53111800 |
| C | 1.87950700  | -0.61330300 | 0.16236500  | O  | -2.27219700 | 0.63390900  | -1.76264600 |
| C | 1.55143400  | 0.73747100  | -0.41309500 | O  | -4.47323600 | 0.28329500  | -2.18617600 |
| H | 1.11108900  | -0.86470000 | 0.89387200  | C  | -3.84744200 | 2.54534900  | 0.54084000  |
| H | 2.24375400  | 1.18760100  | -1.11238300 | O  | -2.76069300 | 1.86989000  | 0.90799500  |
| C | 1.81420300  | -1.69672400 | -0.92285500 | O  | -4.86172300 | 1.92208000  | 0.19787000  |
| C | 1.17469100  | -2.91639100 | -0.65295500 | C  | -3.98074600 | -0.88991500 | 2.48502700  |
| C | 2.35127300  | -1.50557900 | -2.20675800 | O  | -5.02583600 | -0.68563500 | 1.78318100  |
| C | 1.09041700  | -3.91687500 | -1.62409700 | O  | -2.77610900 | -0.75151300 | 2.09530900  |
| H | 0.74662500  | -3.08062000 | 0.32966800  | C  | -3.05538900 | 0.94409700  | -3.98400900 |
| C | 2.26281000  | -2.50161100 | -3.18091800 | C  | -3.79178000 | 4.03766000  | 0.62646600  |
| H | 2.83979300  | -0.56911600 | -2.45495000 | C  | -3.20621800 | -4.07669300 | -1.11319100 |
| C | 1.63476900  | -3.71522100 | -2.89332600 | C  | -4.18804200 | -1.36860300 | 3.90407300  |
| H | 0.59641900  | -4.85586500 | -1.38445100 | H  | -2.62483100 | 0.07065000  | -4.48747400 |
| H | 2.68502600  | -2.32598600 | -4.16760000 | H  | -3.99506900 | 1.20671600  | -4.47327100 |
| H | 1.56719000  | -4.49181700 | -3.65134600 | H  | -2.33524300 | 1.76196600  | -4.06621100 |
| C | 0.41242200  | 1.41648400  | -0.13206300 | H  | -4.00584800 | -4.37993600 | -1.79261000 |

|           |             |             |             |   |             |             |             |
|-----------|-------------|-------------|-------------|---|-------------|-------------|-------------|
| H         | -2.22644400 | -4.24526000 | -1.56443300 | C | -6.49183600 | -1.72785000 | -2.39430000 |
| H         | -3.27947600 | -4.68546200 | -0.20417300 | C | -5.97197300 | -3.01495200 | -2.46044300 |
| H         | -5.15233200 | -1.02552700 | 4.28485400  | C | -4.85971300 | -3.38437200 | -1.67817400 |
| H         | -4.18644000 | -2.46506600 | 3.90972700  | C | -4.24820000 | -2.48230600 | -0.81557800 |
| H         | -3.37296600 | -1.02445300 | 4.54418700  | C | -4.39878600 | 0.01518200  | 0.04538300  |
| H         | -3.64450800 | 4.33428100  | 1.67139500  | C | -5.29677800 | 0.98432700  | -0.33929400 |
| H         | -2.92716500 | 4.39496700  | 0.05911600  | H | -7.34881600 | -1.43721400 | -2.99565200 |
| H         | -4.71959400 | 4.46693000  | 0.24765000  | H | -6.42928000 | -3.74426900 | -3.12356600 |
| <b>40</b> |             |             |             | H | -4.47370000 | -4.39786300 | -1.74778300 |
| C         | -3.21592400 | 0.21723000  | 0.98022100  | H | -3.39298000 | -2.79020500 | -0.22510000 |
| C         | -2.95377000 | -1.03254600 | 1.87121400  | H | 0.32702500  | 3.03949800  | 0.19231300  |
| C         | -1.66277600 | -1.44527900 | 2.23335700  | H | -5.38459600 | 2.00707400  | -0.00353000 |
| C         | -4.05099500 | -1.71183100 | 2.42501100  | N | -6.18426300 | 0.49989600  | -1.27524800 |
| C         | -1.48129100 | -2.52918600 | 3.09659500  | C | -7.27307000 | 1.23791000  | -1.88009500 |
| H         | -0.78285200 | -0.94587600 | 1.84544200  | H | -7.15830900 | 1.28493400  | -2.96964200 |
| C         | -3.86728000 | -2.79032100 | 3.28980900  | H | -8.24004600 | 0.77404700  | -1.65046600 |
| H         | -5.05641600 | -1.39532600 | 2.16812000  | H | -7.27345400 | 2.25681300  | -1.48694700 |
| C         | -2.57859700 | -3.20753300 | 3.62701300  | C | -1.92218700 | 0.65843400  | 0.16488500  |
| H         | -0.47090900 | -2.83892400 | 3.35027800  | C | -1.39516600 | -0.45321800 | -0.70231100 |
| H         | -4.73408200 | -3.30423600 | 3.69730700  | H | -1.15731100 | 0.88590500  | 0.90836400  |
| H         | -2.43177700 | -4.05024600 | 4.29750600  | H | -2.08170300 | -0.99652600 | -1.33706700 |
| C         | -3.46248800 | 1.27757000  | 2.08248300  | C | -2.12990900 | 1.95002000  | -0.64738100 |
| O         | -2.57470400 | 1.88318400  | 2.65693200  | C | -1.97318900 | 3.21766000  | -0.05326900 |
| O         | -4.75223100 | 1.40042200  | 2.44232100  | C | -2.42743200 | 1.91217400  | -2.01872600 |
| C         | -4.99907200 | 2.23573000  | 3.58709600  | C | -2.09513400 | 4.39433400  | -0.80300300 |
| H         | -6.07939300 | 2.21404300  | 3.73270500  | H | -1.80701500 | 3.28494200  | 1.01717100  |
| H         | -4.48332700 | 1.83912100  | 4.46530700  | C | -2.55420200 | 3.08361700  | -2.76686700 |
| H         | -4.65465200 | 3.25621400  | 3.40106800  | H | -2.54329000 | 0.95367200  | -2.51219500 |
| C         | -4.74859100 | -1.16765200 | -0.72038100 | C | -2.38208800 | 4.33250600  | -2.16619900 |
| C         | -5.87153600 | -0.82168500 | -1.52620300 | H | -1.96821400 | 5.35759400  | -0.31441300 |

|    |             |             |             |           |             |             |             |
|----|-------------|-------------|-------------|-----------|-------------|-------------|-------------|
| H  | -2.78066300 | 3.01747600  | -3.82807900 | H         | 6.82971900  | -1.81943100 | -2.53329800 |
| H  | -2.47102600 | 5.24307700  | -2.75245700 | H         | 7.77106700  | -0.78956300 | -1.40257800 |
| C  | -0.08132300 | -0.79870000 | -0.74105800 | H         | 2.19452200  | 3.35435000  | -2.86188900 |
| O  | 0.87748500  | -0.26690700 | 0.00208800  | H         | 3.95568300  | 3.46942200  | -3.05300000 |
| C  | 0.35713200  | -1.89017000 | -1.65990500 | H         | 3.01104100  | 2.27986500  | -4.01210100 |
| O  | 1.55360400  | -2.18804100 | -1.79027800 | H         | -0.28302100 | 2.31256900  | 2.64054000  |
| O  | -0.59310300 | -2.53581000 | -2.33230600 | H         | 1.16125100  | 2.73100300  | 3.59208700  |
| C  | -0.15294300 | -3.57529300 | -3.22672400 | H         | 0.40950000  | 3.93819900  | 2.51057900  |
| H  | -1.06488200 | -3.96767200 | -3.67631800 | H         | 2.81990500  | -2.33290300 | 3.94152100  |
| H  | 0.51153500  | -3.16351500 | -3.99041600 | H         | 3.38562000  | -3.65537100 | 2.89468800  |
| H  | 0.37337600  | -4.35592500 | -2.67202900 | H         | 4.55795600  | -2.57808900 | 3.72506100  |
| Rh | 2.77015700  | -0.78242300 | -0.60751100 | <b>41</b> |             |             |             |
| Rh | 4.09627600  | 0.84594300  | 0.69225600  | C         | 2.98307600  | -0.11504400 | -1.10182500 |
| C  | 3.26800500  | 1.75995900  | -1.93719600 | C         | 2.67302000  | -1.59527000 | -1.46854500 |
| O  | 2.69003400  | 0.63911400  | -2.10772900 | C         | 1.36665900  | -2.09145800 | -1.58756700 |
| O  | 3.94780600  | 2.12064800  | -0.92194700 | C         | 3.74068100  | -2.44906700 | -1.79077900 |
| C  | 5.66934700  | -0.93623400 | -0.95611200 | C         | 1.14379200  | -3.41223900 | -1.98796100 |
| O  | 4.58328700  | -1.45729600 | -1.34386600 | H         | 0.50701900  | -1.47064600 | -1.36512900 |
| O  | 5.76082200  | 0.02470400  | -0.12506700 | C         | 3.51552200  | -3.76420400 | -2.19465600 |
| C  | 3.55873500  | -1.68079800 | 2.04362900  | H         | 4.75700300  | -2.07615500 | -1.71985800 |
| O  | 2.93633700  | -2.07175700 | 1.00475300  | C         | 2.21221000  | -4.25512900 | -2.29184700 |
| O  | 4.14306200  | -0.56041700 | 2.20606100  | H         | 0.12213300  | -3.77655800 | -2.06321100 |
| C  | 1.55915100  | 2.40948000  | 1.52583600  | H         | 4.36135500  | -4.40448200 | -2.43190900 |
| O  | 2.58659200  | 1.78253300  | 1.78500800  | H         | 2.03282700  | -5.28073800 | -2.60396200 |
| O  | 1.24558400  | 2.70947000  | 0.27324500  | C         | 3.17833700  | 0.50054700  | -2.51341100 |
| C  | 6.95926000  | -1.51404000 | -1.49219200 | O         | 2.27143200  | 0.92355000  | -3.19945800 |
| C  | 3.58978400  | -2.63375200 | 3.22097700  | O         | 4.44835500  | 0.42612900  | -2.96574200 |
| C  | 3.10958300  | 2.77883100  | -3.04534400 | C         | 4.63224300  | 0.83094900  | -4.33271900 |
| C  | 0.65661100  | 2.87812600  | 2.63675700  | H         | 5.69758900  | 0.70762400  | -4.53105300 |
| H  | 7.21909600  | -2.40534900 | -0.90909900 | H         | 4.04035900  | 0.19921600  | -5.00022700 |

|   |            |             |             |    |             |             |             |
|---|------------|-------------|-------------|----|-------------|-------------|-------------|
| H | 4.33098400 | 1.87260400  | -4.47038100 | C  | 2.25641100  | 4.90797000  | 0.19927900  |
| C | 4.52621100 | -0.82551700 | 0.95298000  | H  | 1.14820900  | 5.13668600  | -1.63856300 |
| C | 5.71177800 | -0.28318000 | 1.52771500  | H  | 3.32214800  | 4.34490200  | 1.98849600  |
| C | 6.32056400 | -0.82676100 | 2.66507500  | H  | 2.36864700  | 5.97625800  | 0.36643200  |
| C | 5.72490400 | -1.94133000 | 3.24378700  | C  | -0.07207400 | -0.33251400 | 0.99566200  |
| C | 4.55140000 | -2.49816200 | 2.69740300  | O  | -1.01391800 | -0.28573900 | 0.04727300  |
| C | 3.95154700 | -1.95663000 | 1.56646700  | C  | -0.55825400 | -0.76511900 | 2.32921700  |
| C | 4.20846000 | -0.01427600 | -0.20800300 | O  | -1.77565500 | -0.85559900 | 2.57832400  |
| C | 5.18912600 | 0.94870100  | -0.26559100 | O  | 0.35540900  | -1.03884800 | 3.25265900  |
| H | 7.22692000 | -0.39538300 | 3.08104800  | C  | -0.13319000 | -1.39986200 | 4.55994400  |
| H | 6.17175400 | -2.38924000 | 4.12733400  | H  | 0.76100800  | -1.57119600 | 5.15850600  |
| H | 4.10872700 | -3.37231700 | 3.16746900  | H  | -0.73185300 | -0.58694200 | 4.97808600  |
| H | 3.05045900 | -2.40335500 | 1.16165500  | H  | -0.74046500 | -2.30606600 | 4.50041600  |
| H | 5.32296000 | 1.74580600  | -0.98104400 | Rh | -2.88779900 | -0.25954200 | 0.78960400  |
| N | 6.09312700 | 0.80361500  | 0.76546300  | Rh | -3.86938900 | 0.42236400  | -1.33650200 |
| C | 7.26687300 | 1.62058700  | 0.99045200  | C  | -2.87122200 | 2.60061300  | 0.29764200  |
| H | 7.24496400 | 2.06864700  | 1.99094400  | O  | -2.62788800 | 1.74668500  | 1.20720500  |
| H | 8.18680700 | 1.03095100  | 0.89220700  | O  | -3.41722500 | 2.35749300  | -0.83462300 |
| H | 7.28708000 | 2.42450600  | 0.25151900  | C  | -5.78350000 | 0.17577700  | 0.76064600  |
| C | 1.73035600 | 0.62973000  | -0.46289700 | O  | -4.85578300 | -0.19606400 | 1.52275500  |
| C | 1.22854400 | 0.00139200  | 0.81031600  | O  | -5.65125900 | 0.50604900  | -0.47900300 |
| H | 0.93534200 | 0.56229100  | -1.20486200 | C  | -3.69338400 | -2.44997200 | -0.94444800 |
| H | 1.90670100 | -0.12415100 | 1.64431300  | O  | -3.18401000 | -2.22226900 | 0.19541000  |
| C | 1.96201600 | 2.12977100  | -0.23024300 | O  | -4.09303300 | -1.56904400 | -1.78292800 |
| C | 1.42481100 | 3.06280000  | -1.13131800 | C  | -7.19029700 | 0.24056900  | 1.30736600  |
| C | 2.64485200 | 2.62009100  | 0.89549300  | C  | -3.83055200 | -3.89921200 | -1.35423300 |
| C | 1.57072900 | 4.43666300  | -0.92172600 | C  | -2.45306800 | 4.02666100  | 0.56399000  |
| H | 0.90215600 | 2.70399500  | -2.01204900 | H  | -7.52746300 | -0.77438900 | 1.54379000  |
| C | 2.79247100 | 3.99210800  | 1.10683200  | H  | -7.19119700 | 0.81534700  | 2.23805100  |
| H | 3.05605400 | 1.92779400  | 1.62257100  | H  | -7.87103700 | 0.69146600  | 0.58391600  |

|   |             |            |             |   |             |             |             |
|---|-------------|------------|-------------|---|-------------|-------------|-------------|
| H | -1.39981000 | 4.13850400 | 0.27876200  | H | -2.83251100 | -4.32667000 | -1.50087700 |
| H | -3.05276500 | 4.72021700 | -0.02900200 | H | -4.31392800 | -4.46470700 | -0.55206300 |
| H | -2.54060100 | 4.25302900 | 1.62919800  | H | -4.40370300 | -3.98776400 | -2.27832600 |

**10. B3-LYP-D3/6-31G(d) geometries for selected the optimized compounds and transition states**

**1**

|    |             |             |             |          |             |             |             |
|----|-------------|-------------|-------------|----------|-------------|-------------|-------------|
| Rh | -0.00395800 | 0.00159200  | 1.19660400  | H        | 3.62627100  | -2.80748000 | -0.58140300 |
| Rh | 0.00474200  | 0.00112000  | -1.19656000 | H        | 3.04237200  | -3.36309700 | 1.01926400  |
| C  | 1.96840700  | 1.75231400  | 0.01026100  | H        | -2.74635200 | -3.67488100 | 0.49186400  |
| O  | 1.53140100  | 1.36607100  | 1.14336400  | H        | -3.92741300 | -2.36624500 | 0.58134000  |
| O  | 1.53788600  | 1.36808600  | -1.12683600 | H        | -3.41247400 | -2.98622600 | -1.01935300 |
| C  | -1.75183700 | 1.96829000  | -0.01011300 | <b>2</b> |             |             |             |
| O  | -1.36836400 | 1.53708600  | 1.12696200  | C        | -0.50034200 | 0.40006100  | 0.00023600  |
| O  | -1.36216500 | 1.53433500  | -1.14323700 | N        | -0.84788500 | 1.67125600  | 0.00049500  |
| C  | -1.96699500 | 1.75059900  | -0.01022900 | N        | -1.11688500 | 2.77695800  | 0.00103300  |
| O  | -1.53970700 | -1.36274100 | 1.12683500  | C        | 0.94236100  | 0.07702000  | 0.00007900  |
| O  | -1.52858000 | -1.36593300 | -1.14333300 | C        | 1.38804100  | -1.25757800 | 0.00079100  |
| C  | 1.75108300  | -1.96710600 | 0.01014800  | C        | 1.90328200  | 1.10662600  | -0.00076700 |
| O  | 1.37195600  | -1.53203400 | -1.12690100 | C        | 2.75394500  | -1.53957000 | 0.00065400  |
| O  | 1.36058800  | -1.53390300 | 1.14326900  | H        | 0.66536900  | -2.06203400 | 0.00140400  |
| C  | -2.76394700 | 3.08826200  | -0.00236500 | C        | 3.26405800  | 0.81210300  | -0.00086200 |
| C  | -3.08948000 | -2.75995500 | -0.00227000 | H        | 1.59360100  | 2.14820400  | -0.00141400 |
| C  | 3.09959800  | 2.75186700  | 0.00223900  | C        | 3.70038000  | -0.51436000 | -0.00014400 |
| C  | 2.74806500  | -3.10059000 | 0.00218300  | H        | 3.07610900  | -2.57758400 | 0.00122200  |
| H  | -3.68849700 | 2.73278600  | 0.46464100  | H        | 3.98422600  | 1.62591700  | -0.00153400 |
| H  | -2.38591200 | 3.91576800  | 0.60571900  | H        | 4.76221400  | -0.74368500 | -0.00021800 |
| H  | -2.97013500 | 3.42922900  | -1.01786400 | C        | -1.62243500 | -0.55038600 | -0.00022400 |
| H  | 3.96441100  | 2.31251200  | -0.50554800 | O        | -1.52112400 | -1.76269400 | -0.00024100 |
| H  | 2.79791500  | 3.63565400  | -0.56860100 | O        | -2.81567100 | 0.09726500  | -0.00059100 |
| H  | 3.37068500  | 3.03640200  | 1.01984400  | C        | -3.97051400 | -0.75672100 | -0.00024600 |
| H  | 2.30036500  | -3.96913600 | -0.49197900 | H        | -4.82810200 | -0.08323800 | 0.00442400  |

|                      |             |             |             |   |             |             |             |
|----------------------|-------------|-------------|-------------|---|-------------|-------------|-------------|
| H                    | -3.98169300 | -1.38924300 | -0.89245300 | O | 0.98460400  | -2.04656800 | 0.61504400  |
| H                    | -3.97663200 | -1.39557400 | 0.88742700  | C | 3.94694600  | -1.08447100 | -0.97129400 |
| <b>N<sub>2</sub></b> |             |             |             | O | 4.25958300  | -0.49413100 | 0.11065800  |
| N                    | 0.00000000  | 0.00000000  | 0.55265200  | O | 2.77873800  | -1.16563100 | -1.48099700 |
| N                    | 0.00000000  | 0.00000000  | -0.55265200 | C | 2.39762000  | 2.29631900  | -0.97812200 |
| <b>6</b>             |             |             |             | O | 3.06130300  | 2.15211400  | 0.09778700  |
| C                    | -0.38829100 | 0.98706200  | 0.00001200  | O | 1.54963300  | 1.47654800  | -1.46429700 |
| C                    | 0.15236100  | -0.33077900 | -0.00009200 | C | 0.05463400  | 1.33239800  | 1.85582300  |
| C                    | -0.65665000 | -1.47286900 | -0.00007600 | O | -0.25029600 | 0.62812700  | 0.75304700  |
| C                    | -2.03464300 | -1.28219000 | -0.00001400 | O | 1.22026200  | 1.35657400  | 2.25240500  |
| C                    | -2.59270300 | 0.01372600  | 0.00004600  | C | 5.05236700  | -1.78938200 | -1.71984300 |
| C                    | -1.78476900 | 1.14476600  | 0.00005900  | C | 2.64487500  | 3.55529400  | -1.77946300 |
| C                    | 0.72756800  | 1.89052100  | 0.00004200  | C | 1.43880000  | -3.48854700 | 2.44040400  |
| C                    | 1.86228100  | 1.12199800  | -0.00005400 | C | -1.06107400 | 2.04472200  | 2.54678800  |
| H                    | -0.22649800 | -2.47054800 | -0.00009000 | H | 5.09862200  | -2.83026200 | -1.37872600 |
| H                    | -2.69294000 | -2.14675200 | -0.00000400 | H | 4.84310700  | -1.78962700 | -2.79168900 |
| H                    | -3.67366500 | 0.12546400  | 0.00009500  | H | 6.01266500  | -1.31366400 | -1.51094600 |
| H                    | -2.22378100 | 2.13922300  | 0.00012600  | H | 2.11338800  | -4.23836600 | 2.01048600  |
| H                    | 0.69046900  | 2.97113900  | 0.00006200  | H | 1.67952600  | -3.37056700 | 3.49868100  |
| H                    | 2.90317200  | 1.41716900  | -0.00007700 | H | 0.41371300  | -3.84306300 | 2.31024900  |
| N                    | 1.52982100  | -0.22253600 | -0.00020400 | H | -1.47088100 | 2.82635700  | 1.89678800  |
| C                    | 2.45138700  | -1.33794600 | 0.00018300  | H | -1.88604100 | 1.35554700  | 2.74954300  |
| H                    | 2.31085900  | -1.96171600 | 0.89135300  | H | -0.68706800 | 2.48352000  | 3.47158400  |
| H                    | 2.30878700  | -1.96379200 | -0.88918200 | H | 1.70088300  | 3.93975100  | -2.17496500 |
| H                    | 3.47560300  | -0.95817100 | -0.00148900 | H | 3.14244200  | 4.31027800  | -1.16836200 |
| <b>14</b>            |             |             |             | H | 3.28595200  | 3.30826500  | -2.63344000 |
| Rh                   | 2.81891600  | 0.43084700  | 1.21754800  | C | -2.37720000 | -0.96862100 | -0.99418700 |
| Rh                   | 1.22605300  | -0.32714500 | -0.49456900 | C | -3.51996900 | -1.75534600 | -0.48227100 |
| C                    | 1.63588800  | -2.18395700 | 1.70393600  | C | -3.34555100 | -2.83664800 | 0.40491900  |
| O                    | 2.44471700  | -1.34253400 | 2.21007600  | C | -4.83917300 | -1.41281300 | -0.83961900 |

|   |             |             |             |                |             |             |             |
|---|-------------|-------------|-------------|----------------|-------------|-------------|-------------|
| C | -4.43910100 | -3.53651700 | 0.91123600  | C              | -1.44387800 | 3.85460700  | -2.10946500 |
| H | -2.33798200 | -3.12191000 | 0.68886700  | H              | -2.19477100 | 4.58958400  | -2.41889900 |
| C | -5.93381300 | -2.10926600 | -0.32903200 | H              | -0.75931400 | 4.32997200  | -1.39477000 |
| H | -4.99889000 | -0.58125800 | -1.52072200 | H              | -0.87263000 | 3.54143000  | -2.98512100 |
| C | -5.74139700 | -3.17654300 | 0.55156900  | <b>15</b>      |             |             |             |
| H | -4.27461300 | -4.36442300 | 1.59727500  | C              | -0.72659900 | -0.72750000 | -0.00017000 |
| H | -6.93975200 | -1.82025500 | -0.62419300 | C              | 0.40585200  | 0.00943600  | -0.00034700 |
| H | -6.59301000 | -3.72107800 | 0.95112000  | H              | -0.59713600 | -1.81002300 | -0.00012000 |
| C | -1.22700600 | -1.57411400 | -1.49626300 | H              | 0.40702500  | 1.09338100  | -0.00039500 |
| O | -0.20679600 | -0.93617900 | -1.97045700 | C              | -2.10408300 | -0.24717300 | -0.00003200 |
| O | -1.19576600 | -2.93938300 | -1.51206800 | C              | -3.14845500 | -1.19194000 | 0.00029800  |
| C | -0.04578200 | -3.54356200 | -2.10715400 | C              | -2.44101700 | 1.12216500  | -0.00022200 |
| H | -0.24050200 | -4.61809600 | -2.07242400 | C              | -4.48201000 | -0.78838400 | 0.00044100  |
| H | 0.08082700  | -3.21890100 | -3.14510200 | H              | -2.90317800 | -2.25117400 | 0.00044100  |
| H | 0.86264100  | -3.30739500 | -1.54714300 | C              | -3.77191300 | 1.52440700  | -0.00008200 |
| C | -3.21838900 | 1.35600200  | -0.08777900 | H              | -1.65578100 | 1.87179300  | -0.00048900 |
| C | -2.93350900 | 2.70965900  | -0.44331200 | C              | -4.79775500 | 0.57170000  | 0.00025200  |
| C | -3.43491500 | 3.79990800  | 0.27857300  | H              | -5.27299700 | -1.53306900 | 0.00069700  |
| C | -4.24309000 | 3.52768500  | 1.37902100  | H              | -4.01452200 | 2.58346400  | -0.00023700 |
| C | -4.54386100 | 2.19948800  | 1.74720900  | H              | -5.83638600 | 0.89076000  | 0.00036000  |
| C | -4.04409800 | 1.11757100  | 1.02962500  | C              | 1.71575700  | -0.65689700 | -0.00038400 |
| C | -2.47403500 | 0.49938500  | -1.01146800 | O              | 1.89331800  | -1.86480400 | -0.00063400 |
| C | -1.80542000 | 1.38029200  | -1.85684500 | C              | 2.92036800  | 0.31377200  | -0.00010700 |
| H | -3.20022100 | 4.82095700  | -0.00875100 | O              | 2.80621300  | 1.52382100  | -0.00038400 |
| H | -4.65110200 | 4.35080200  | 1.95888500  | O              | 4.08487900  | -0.34136700 | 0.00044500  |
| H | -5.18215000 | 2.01892300  | 2.60774800  | C              | 5.25547500  | 0.49435200  | 0.00069700  |
| H | -4.28685700 | 0.10238500  | 1.32134400  | H              | 6.10300600  | -0.19098100 | 0.00168800  |
| H | -1.17429700 | 0.71258800  | 0.36207900  | H              | 5.27106900  | 1.12992800  | -0.88952000 |
| H | -1.10547800 | 1.14709700  | -2.64307200 | H              | 5.26988900  | 1.13109900  | 0.89009200  |
| N | -2.08126400 | 2.69171900  | -1.52683800 | <b>CH3COOH</b> |             |             |             |



|           |             |             |             |   |             |             |             |
|-----------|-------------|-------------|-------------|---|-------------|-------------|-------------|
| C         | 1.39678000  | -0.10890900 | -0.00000100 | H | -2.23968000 | 0.18456100  | -4.69920600 |
| H         | 1.68215500  | -0.69176800 | -0.88201500 | H | -3.51042700 | 1.30812700  | -4.10411600 |
| H         | 1.68225700  | -0.69099300 | 0.88249300  | C | 2.26396100  | -0.71741800 | 0.81503200  |
| H         | 1.91617300  | 0.84960300  | -0.00044800 | C | 1.89603400  | 0.36920800  | 1.74331000  |
| C         | -0.09343900 | 0.12661500  | -0.00000400 | C | 0.61056500  | 0.44917400  | 2.31743100  |
| O         | -0.64647400 | 1.20305200  | 0.00000100  | C | 2.82296600  | 1.37167100  | 2.10446500  |
| O         | -0.77578700 | -1.04822600 | -0.00000500 | C | 0.26401900  | 1.47374900  | 3.19374800  |
| H         | -1.72254200 | -0.81168300 | 0.00002700  | H | -0.12185400 | -0.29513600 | 2.04888700  |
| <b>16</b> |             |             |             | C | 2.47630300  | 2.39948700  | 2.97892500  |
| Rh        | -1.54654700 | -1.71730200 | -0.58995200 | H | 3.81752400  | 1.34958200  | 1.67086000  |
| Rh        | -3.03501400 | 0.02845100  | 0.29024700  | C | 1.19337500  | 2.46106700  | 3.53184100  |
| C         | -2.00712700 | -1.83205300 | 2.27361600  | H | -0.74152700 | 1.49578100  | 3.60779800  |
| O         | -1.41287400 | -2.44845700 | 1.33099900  | H | 3.21099400  | 3.16397500  | 3.22104000  |
| O         | -2.73964400 | -0.79338200 | 2.15701500  | H | 0.92486200  | 3.26261700  | 4.21515300  |
| C         | -4.40266100 | -2.38180300 | -0.55015100 | C | 1.32854800  | -1.26500500 | -0.04772600 |
| O         | -3.27600900 | -2.83243700 | -0.90782000 | O | 0.21483500  | -0.69218000 | -0.39576800 |
| O         | -4.59702600 | -1.24464800 | -0.00474300 | O | 1.66757800  | -2.46245600 | -0.63659600 |
| C         | -2.49647400 | 0.20431400  | -2.56229000 | C | 0.88251100  | -2.89575500 | -1.72603600 |
| O         | -1.77399400 | -0.83176300 | -2.44599300 | H | -0.14663400 | -3.18943800 | -1.40359000 |
| O         | -3.18944500 | 0.75369500  | -1.63659500 | H | 1.36067600  | -3.80003700 | -2.10718900 |
| C         | -5.62392200 | -3.22974500 | -0.81521300 | H | 0.79701900  | -2.14073000 | -2.51424900 |
| C         | -2.52177400 | 0.88493800  | -3.91089800 | C | 4.49388500  | -1.34446400 | -0.41195000 |
| C         | -1.77010900 | -2.33928700 | 3.67552500  | C | 5.80416900  | -1.66585900 | 0.03977500  |
| H         | -6.05437600 | -2.93474900 | -1.77941700 | C | 6.87066700  | -1.87825500 | -0.84048400 |
| H         | -5.34853000 | -4.28494800 | -0.86619500 | C | 6.61567700  | -1.75115300 | -2.20306000 |
| H         | -6.37676800 | -3.06356700 | -0.04123600 | C | 5.32665400  | -1.42557200 | -2.67439000 |
| H         | -0.91435100 | -1.79301300 | 4.09033400  | C | 4.26767500  | -1.22918200 | -1.79307900 |
| H         | -2.64145300 | -2.14527400 | 4.30481900  | C | 3.66406500  | -1.16456400 | 0.76111000  |
| H         | -1.52807700 | -3.40376600 | 3.66067700  | C | 4.49640100  | -1.38227500 | 1.83854500  |
| H         | -1.79729500 | 1.70807300  | -3.89681200 | H | 7.86303700  | -2.12802700 | -0.47518600 |

|   |             |             |             |                    |             |             |             |
|---|-------------|-------------|-------------|--------------------|-------------|-------------|-------------|
| H | 7.42208400  | -1.90793700 | -2.91445900 | H                  | 5.03497400  | 1.77680000  | -1.84207300 |
| H | 5.15832100  | -1.33699700 | -3.74454000 | H                  | 5.57317900  | 4.21200900  | -2.04244200 |
| H | 3.27480400  | -0.99570600 | -2.16523900 | H                  | 0.66455700  | 1.51115400  | -0.35023500 |
| H | 4.26765700  | -1.32365500 | 2.89388900  | <b>17-threo-ts</b> |             |             |             |
| N | 5.78098500  | -1.68504400 | 1.42088100  | Rh                 | 2.06663300  | -1.13180900 | -1.00751700 |
| C | 6.91092900  | -1.98796100 | 2.27073000  | Rh                 | 2.91852500  | -0.11582100 | 1.04008300  |
| H | 7.25361700  | -3.01979000 | 2.12282900  | C                  | 3.08344800  | 1.54699100  | -1.35636900 |
| H | 7.74759600  | -1.31014900 | 2.06130600  | O                  | 2.66855000  | 0.54913200  | -2.03517500 |
| H | 6.61656700  | -1.86414600 | 3.31531400  | O                  | 3.33127200  | 1.54961600  | -0.10742900 |
| C | 0.74701300  | 2.59245400  | -0.43910000 | C                  | 4.84922800  | -1.70694100 | -0.44609000 |
| C | -0.39369900 | 3.29945800  | -0.17409400 | O                  | 3.88504800  | -2.00793500 | -1.22830000 |
| H | -0.48739000 | 4.37279600  | -0.29277900 | O                  | 4.76386900  | -0.91200600 | 0.53502000  |
| C | -1.56374000 | 2.56315300  | 0.19707800  | C                  | 1.69311000  | -2.70611000 | 1.41431600  |
| O | -1.50630100 | 1.35038400  | 0.50751900  | O                  | 1.40718800  | -2.69405100 | 0.16606100  |
| C | -2.90929700 | 3.27960300  | 0.17311600  | O                  | 2.40731200  | -1.85619900 | 2.02663500  |
| O | -3.07627100 | 4.40245600  | -0.24574700 | C                  | 6.17358000  | -2.38276900 | -0.70236100 |
| O | -3.88337700 | 2.49930900  | 0.68744000  | C                  | 1.08691300  | -3.82568000 | 2.22615600  |
| C | -5.22408000 | 3.02895500  | 0.61013000  | C                  | 3.26673800  | 2.86193000  | -2.07068200 |
| H | -5.85588300 | 2.27691800  | 1.08064100  | H                  | 6.18451600  | -3.34355200 | -0.17446900 |
| H | -5.27988300 | 3.98187600  | 1.14125400  | H                  | 6.30277600  | -2.57625200 | -1.76950500 |
| H | -5.50170500 | 3.17184300  | -0.43710200 | H                  | 6.99056900  | -1.76862700 | -0.31830300 |
| C | 2.03552300  | 3.09048000  | -0.86643600 | H                  | 2.57496900  | 3.58268200  | -1.61975100 |
| C | 2.35170000  | 4.46107500  | -0.97754800 | H                  | 4.28368400  | 3.23266400  | -1.90865200 |
| C | 3.02640100  | 2.13660900  | -1.18417600 | H                  | 3.06771900  | 2.75905000  | -3.13839500 |
| C | 3.61636400  | 4.85552700  | -1.39799700 | H                  | 0.04663300  | -3.55998300 | 2.45096600  |
| H | 1.60775800  | 5.21132000  | -0.72603000 | H                  | 1.08318100  | -4.75515900 | 1.65124200  |
| C | 4.29126400  | 2.53240700  | -1.60506300 | H                  | 1.62602900  | -3.95340200 | 3.16641200  |
| H | 2.79613500  | 1.08229500  | -1.07236500 | C                  | -2.07975500 | 0.37957400  | -1.06222000 |
| C | 4.58691600  | 3.89439100  | -1.71440000 | C                  | -2.00553600 | 1.79100700  | -1.47472700 |
| H | 3.85383800  | 5.91261300  | -1.47920400 | C                  | -0.79019000 | 2.37527400  | -1.90994200 |

|   |             |             |             |                 |             |             |             |
|---|-------------|-------------|-------------|-----------------|-------------|-------------|-------------|
| C | -3.12476600 | 2.65014400  | -1.38423100 | C               | -6.89960300 | -1.11416800 | -1.26053500 |
| C | -0.70929900 | 3.72466900  | -2.23817000 | H               | -7.26340900 | -2.05971100 | -1.67628400 |
| H | 0.10918400  | 1.77698000  | -1.97900200 | H               | -7.38955500 | -0.93890300 | -0.29440500 |
| C | -3.03610700 | 4.00107200  | -1.71591000 | H               | -7.17198500 | -0.30759000 | -1.94510000 |
| H | -4.06141600 | 2.27395700  | -1.00040600 | C               | -1.66839100 | 0.86559800  | 1.30246600  |
| C | -1.83007900 | 4.55258900  | -2.14926100 | C               | -0.71891400 | 1.91507200  | 1.25417000  |
| H | 0.24602800  | 4.13283600  | -2.55631800 | H               | -1.03676400 | 2.93752800  | 1.09059500  |
| H | -3.92084000 | 4.62666000  | -1.62314000 | C               | 0.63441200  | 1.71806300  | 1.44141700  |
| H | -1.76182800 | 5.60640500  | -2.40399900 | O               | 1.15980300  | 0.56695300  | 1.75028500  |
| C | -0.89319200 | -0.44117800 | -1.36597300 | C               | 1.51335300  | 2.94718500  | 1.39150800  |
| O | 0.22889900  | -0.22374300 | -0.86997900 | O               | 1.31071100  | 3.91863000  | 0.68723200  |
| O | -1.13444500 | -1.41945900 | -2.24436300 | O               | 2.55047700  | 2.84576400  | 2.24897400  |
| C | -0.15536600 | -2.42283700 | -2.55134600 | C               | 3.52345700  | 3.89589400  | 2.15423300  |
| H | 0.79201600  | -1.96657700 | -2.88125700 | H               | 4.25473800  | 3.68945700  | 2.93629200  |
| H | -0.57345700 | -2.98249000 | -3.38870900 | H               | 3.99600600  | 3.86611800  | 1.16850800  |
| H | 0.00106700  | -3.07978800 | -1.69388100 | H               | 3.05610800  | 4.87243700  | 2.30758000  |
| C | -3.39324400 | -1.73544700 | -0.40652200 | C               | -3.05602700 | 1.07197900  | 1.69122200  |
| C | -4.74931500 | -2.14759900 | -0.47742000 | C               | -3.68107300 | 2.33886300  | 1.65208500  |
| C | -5.19841300 | -3.35424400 | 0.06957500  | C               | -3.83035900 | -0.02648300 | 2.12406900  |
| C | -4.25742400 | -4.17214200 | 0.68789100  | C               | -5.02433800 | 2.48509900  | 1.99012300  |
| C | -2.90235400 | -3.79049600 | 0.76017200  | H               | -3.11495900 | 3.21169300  | 1.35007200  |
| C | -2.46445500 | -2.58536700 | 0.21943200  | C               | -5.17163000 | 0.12227700  | 2.46381400  |
| C | -3.30751900 | -0.41318500 | -1.01088800 | H               | -3.36782200 | -1.00435300 | 2.19386500  |
| C | -4.59520800 | -0.11819300 | -1.42087800 | C               | -5.77967300 | 1.37854200  | 2.38950400  |
| H | -6.24486000 | -3.64114000 | 0.02029300  | H               | -5.48241900 | 3.47002300  | 1.94765700  |
| H | -4.57256500 | -5.11697300 | 1.12176300  | H               | -5.74065100 | -0.74537500 | 2.78711500  |
| H | -2.18782400 | -4.44809400 | 1.24840100  | H               | -6.82694800 | 1.49825700  | 2.65503200  |
| H | -1.41725700 | -2.30983200 | 0.30788900  | H               | -1.26800600 | -0.12733500 | 1.47822200  |
| H | -4.96939900 | 0.74101000  | -1.95461600 | <b>18-threo</b> |             |             |             |
| N | -5.45955400 | -1.15096400 | -1.11780700 | Rh              | 2.06663300  | -1.13180900 | -1.00751700 |

|    |             |             |             |   |             |             |             |
|----|-------------|-------------|-------------|---|-------------|-------------|-------------|
| Rh | 2.91852500  | -0.11582100 | 1.04008300  | C | -1.83007900 | 4.55258900  | -2.14926100 |
| C  | 3.08344800  | 1.54699100  | -1.35636900 | H | 0.24602800  | 4.13283600  | -2.55631800 |
| O  | 2.66855000  | 0.54913200  | -2.03517500 | H | -3.92084000 | 4.62666000  | -1.62314000 |
| O  | 3.33127200  | 1.54961600  | -0.10742900 | H | -1.76182800 | 5.60640500  | -2.40399900 |
| C  | 4.84922800  | -1.70694100 | -0.44609000 | C | -0.89319200 | -0.44117800 | -1.36597300 |
| O  | 3.88504800  | -2.00793500 | -1.22830000 | O | 0.22889900  | -0.22374300 | -0.86997900 |
| O  | 4.76386900  | -0.91200600 | 0.53502000  | O | -1.13444500 | -1.41945900 | -2.24436300 |
| C  | 1.69311000  | -2.70611000 | 1.41431600  | C | -0.15536600 | -2.42283700 | -2.55134600 |
| O  | 1.40718800  | -2.69405100 | 0.16606100  | H | 0.79201600  | -1.96657700 | -2.88125700 |
| O  | 2.40731200  | -1.85619900 | 2.02663500  | H | -0.57345700 | -2.98249000 | -3.38870900 |
| C  | 6.17358000  | -2.38276900 | -0.70236100 | H | 0.00106700  | -3.07978800 | -1.69388100 |
| C  | 1.08691300  | -3.82568000 | 2.22615600  | C | -3.39324400 | -1.73544700 | -0.40652200 |
| C  | 3.26673800  | 2.86193000  | -2.07068200 | C | -4.74931500 | -2.14759900 | -0.47742000 |
| H  | 6.18451600  | -3.34355200 | -0.17446900 | C | -5.19841300 | -3.35424400 | 0.06957500  |
| H  | 6.30277600  | -2.57625200 | -1.76950500 | C | -4.25742400 | -4.17214200 | 0.68789100  |
| H  | 6.99056900  | -1.76862700 | -0.31830300 | C | -2.90235400 | -3.79049600 | 0.76017200  |
| H  | 2.57496900  | 3.58268200  | -1.61975100 | C | -2.46445500 | -2.58536700 | 0.21943200  |
| H  | 4.28368400  | 3.23266400  | -1.90865200 | C | -3.30751900 | -0.41318500 | -1.01088800 |
| H  | 3.06771900  | 2.75905000  | -3.13839500 | C | -4.59520800 | -0.11819300 | -1.42087800 |
| H  | 0.04663300  | -3.55998300 | 2.45096600  | H | -6.24486000 | -3.64114000 | 0.02029300  |
| H  | 1.08318100  | -4.75515900 | 1.65124200  | H | -4.57256500 | -5.11697300 | 1.12176300  |
| H  | 1.62602900  | -3.95340200 | 3.16641200  | H | -2.18782400 | -4.44809400 | 1.24840100  |
| C  | -2.07975500 | 0.37957400  | -1.06222000 | H | -1.41725700 | -2.30983200 | 0.30788900  |
| C  | -2.00553600 | 1.79100700  | -1.47472700 | H | -4.96939900 | 0.74101000  | -1.95461600 |
| C  | -0.79019000 | 2.37527400  | -1.90994200 | N | -5.45955400 | -1.15096400 | -1.11780700 |
| C  | -3.12476600 | 2.65014400  | -1.38423100 | C | -6.89960300 | -1.11416800 | -1.26053500 |
| C  | -0.70929900 | 3.72466900  | -2.23817000 | H | -7.26340900 | -2.05971100 | -1.67628400 |
| H  | 0.10918400  | 1.77698000  | -1.97900200 | H | -7.38955500 | -0.93890300 | -0.29440500 |
| C  | -3.03610700 | 4.00107200  | -1.71591000 | H | -7.17198500 | -0.30759000 | -1.94510000 |
| H  | -4.06141600 | 2.27395700  | -1.00040600 | C | -1.66839100 | 0.86559800  | 1.30246600  |

|                      |             |             |             |   |             |             |             |
|----------------------|-------------|-------------|-------------|---|-------------|-------------|-------------|
| C                    | -0.71891400 | 1.91507200  | 1.25417000  | O | 4.27026700  | 0.90105600  | -1.68613000 |
| H                    | -1.03676400 | 2.93752800  | 1.09059500  | O | 4.96629500  | 0.40093200  | 0.39928000  |
| C                    | 0.63441200  | 1.71806300  | 1.44141700  | C | 3.10581000  | -2.26948700 | -0.87552400 |
| O                    | 1.15980300  | 0.56695300  | 1.75028500  | O | 2.70261100  | -1.45764100 | -1.77009500 |
| C                    | 1.51335300  | 2.94718500  | 1.39150800  | O | 3.33535500  | -1.98496200 | 0.34456000  |
| O                    | 1.31071100  | 3.91863000  | 0.68723200  | C | 6.57684900  | 1.16660600  | -1.18398000 |
| O                    | 2.55047700  | 2.84576400  | 2.24897400  | C | 3.27117100  | -3.71427600 | -1.27616400 |
| C                    | 3.52345700  | 3.89589400  | 2.15423300  | C | 2.01038100  | 4.13933000  | 1.04091200  |
| H                    | 4.25473800  | 3.68945700  | 2.93629200  | H | 7.30122200  | 0.64347500  | -0.55667000 |
| H                    | 3.99600600  | 3.86611800  | 1.16850800  | H | 6.74738400  | 0.94672100  | -2.24017400 |
| H                    | 3.05610800  | 4.87243700  | 2.30758000  | H | 6.70139600  | 2.24549400  | -1.03440800 |
| C                    | -3.05602700 | 1.07197900  | 1.69122200  | H | 2.42187700  | 4.84535000  | 0.31403200  |
| C                    | -3.68107300 | 2.33886300  | 1.65208500  | H | 0.92272700  | 4.26992600  | 1.04752900  |
| C                    | -3.83035900 | -0.02648300 | 2.12406900  | H | 2.41192900  | 4.33515900  | 2.03638000  |
| C                    | -5.02433800 | 2.48509900  | 1.99012300  | H | 3.32507100  | -3.81356600 | -2.36168500 |
| H                    | -3.11495900 | 3.21169300  | 1.35007200  | H | 4.16500800  | -4.13516200 | -0.80780900 |
| C                    | -5.17163000 | 0.12227700  | 2.46381400  | H | 2.39876500  | -4.26057000 | -0.89887100 |
| H                    | -3.36782200 | -1.00435300 | 2.19386500  | C | -2.08268200 | 0.70660200  | -0.79839800 |
| C                    | -5.77967300 | 1.37854200  | 2.38950400  | C | -1.99763500 | 2.18406100  | -0.64261100 |
| H                    | -5.48241900 | 3.47002300  | 1.94765700  | C | -3.01413500 | 2.89779900  | 0.03157700  |
| H                    | -5.74065100 | -0.74537500 | 2.78711500  | C | -0.93569500 | 2.94426500  | -1.17721000 |
| H                    | -6.82694800 | 1.49825700  | 2.65503200  | C | -2.96216200 | 4.28266300  | 0.18006800  |
| H                    | -1.26800600 | -0.12733500 | 1.47822200  | H | -3.85128900 | 2.35903200  | 0.45249900  |
| <b>21-erythro-ts</b> |             |             |             | C | -0.88975100 | 4.32952300  | -1.03525300 |
| Rh                   | 2.33937300  | 0.51079500  | -1.26339900 | H | -0.13187100 | 2.45786400  | -1.70843300 |
| Rh                   | 3.03623500  | -0.04851900 | 1.01480700  | C | -1.89752700 | 5.01284700  | -0.35009800 |
| C                    | 2.31592400  | 2.72522000  | 0.61288500  | H | -3.76086600 | 4.78839300  | 0.71723900  |
| O                    | 2.11397200  | 2.44848300  | -0.61774500 | H | -0.05355800 | 4.87339200  | -1.46672700 |
| O                    | 2.73351900  | 1.92231600  | 1.50576800  | H | -1.85674600 | 6.09311000  | -0.23878300 |
| C                    | 5.17235500  | 0.78395500  | -0.78809000 | C | -0.89232100 | 0.00372700  | -1.26734000 |

|   |             |             |             |                   |             |             |             |
|---|-------------|-------------|-------------|-------------------|-------------|-------------|-------------|
| O | 0.27055600  | 0.32201700  | -0.93644500 | C                 | -3.11102400 | 1.56895500  | 2.77039400  |
| O | -1.16219200 | -1.03457300 | -2.05994600 | C                 | -5.16103800 | -0.31566700 | 2.69854400  |
| C | -0.15157300 | -2.01840300 | -2.33799200 | H                 | -3.79888700 | -1.56068900 | 1.61229100  |
| H | 0.64361200  | -1.59735900 | -2.95262600 | C                 | -4.33094100 | 1.84863600  | 3.38171300  |
| H | -0.67717200 | -2.80717800 | -2.87758400 | H                 | -2.31140300 | 2.30296000  | 2.79620500  |
| H | 0.26053000  | -2.41097600 | -1.40692200 | C                 | -5.36558600 | 0.91064300  | 3.33960500  |
| C | -3.84161800 | -1.26840500 | -1.08454300 | H                 | -5.95880800 | -1.05277600 | 2.66369900  |
| C | -5.21016000 | -1.27556100 | -1.47015200 | H                 | -4.47447600 | 2.79935800  | 3.88833300  |
| C | -5.99141200 | -2.43506300 | -1.50341500 | H                 | -6.32128000 | 1.12931100  | 3.80876700  |
| C | -5.38165900 | -3.63216100 | -1.14551200 | C                 | 0.40798400  | -1.32834400 | 1.61535500  |
| C | -4.02325500 | -3.66055500 | -0.77346400 | O                 | 1.22678200  | -0.34432200 | 1.84995400  |
| C | -3.25398500 | -2.50188100 | -0.74708900 | C                 | 0.93377900  | -2.74222600 | 1.57642600  |
| C | -3.39134600 | 0.11899800  | -1.12863100 | O                 | 0.57378400  | -3.57799400 | 0.76059900  |
| C | -4.49464400 | 0.84056000  | -1.56099800 | O                 | 1.82605100  | -2.97013200 | 2.54929600  |
| H | -7.03672500 | -2.39992000 | -1.79702200 | C                 | 2.48396800  | -4.24630700 | 2.51610600  |
| H | -5.95666900 | -4.55387500 | -1.15926500 | H                 | 3.04568500  | -4.30989500 | 3.44820400  |
| H | -3.56236400 | -4.60809100 | -0.50791200 | H                 | 1.75440500  | -5.05734700 | 2.44516600  |
| H | -2.21090600 | -2.56108400 | -0.46900100 | H                 | 3.16195400  | -4.27862500 | 1.65972200  |
| H | -4.57583900 | 1.89809700  | -1.76202000 |                   |             |             |             |
| N | -5.57760100 | 0.02358100  | -1.76843200 | <b>22-erythro</b> |             |             |             |
| C | -6.89997200 | 0.44315400  | -2.18065900 | Rh                | 2.24776900  | 0.37767100  | -1.33527900 |
| H | -6.88684500 | 1.51504800  | -2.38899800 | Rh                | 2.84019600  | 0.15786100  | 1.02572300  |
| H | -7.20789200 | -0.08811600 | -3.08857400 | C                 | 2.32335900  | 2.87200600  | 0.13458600  |
| H | -7.63666600 | 0.24605600  | -1.39225700 | O                 | 2.15896400  | 2.40812900  | -1.04951600 |
| C | -1.58346700 | 0.09663400  | 1.51170400  | O                 | 2.68274500  | 2.21456400  | 1.15677200  |
| C | -0.96265800 | -1.17732400 | 1.50850200  | C                 | 5.08370700  | 0.43078000  | -0.86592900 |
| H | -0.89350600 | 0.93466200  | 1.53360300  | O                 | 4.20692200  | 0.46502500  | -1.79953500 |
| H | -1.56214600 | -2.07935700 | 1.51143600  | O                 | 4.82553600  | 0.31360600  | 0.36324800  |
| C | -2.88990900 | 0.33999800  | 2.11331900  | C                 | 2.57057000  | -2.36022500 | -0.44217000 |
| C | -3.93720200 | -0.60481100 | 2.10226600  | O                 | 2.26276200  | -1.67620000 | -1.47855300 |
|   |             |             |             | O                 | 2.91679600  | -1.88641900 | 0.68561000  |

|   |             |             |             |   |             |             |             |
|---|-------------|-------------|-------------|---|-------------|-------------|-------------|
| C | 6.52462700  | 0.57400900  | -1.29181300 | H | 0.43385300  | -1.31223100 | -3.05069200 |
| C | 2.47553900  | -3.86103700 | -0.54401000 | C | -3.03934100 | -1.83052100 | -0.99376300 |
| C | 2.02347700  | 4.34126100  | 0.31255200  | C | -4.28469100 | -2.35802300 | -1.43413300 |
| H | 7.18727300  | 0.16613800  | -0.52632200 | C | -4.49133900 | -3.72275600 | -1.66555700 |
| H | 6.68830200  | 0.07635900  | -2.25068000 | C | -3.41198400 | -4.57737400 | -1.47092900 |
| H | 6.74890800  | 1.63938200  | -1.41991200 | C | -2.15867900 | -4.07854200 | -1.06237600 |
| H | 2.47579700  | 4.91811500  | -0.49906000 | C | -1.96117200 | -2.72261300 | -0.83008200 |
| H | 0.93672800  | 4.47697900  | 0.25477100  | C | -3.20747800 | -0.39261600 | -0.87752900 |
| H | 2.38114200  | 4.69407400  | 1.28102500  | C | -4.49840100 | -0.13304300 | -1.27448900 |
| H | 3.37424500  | -4.31766700 | -0.11912100 | H | -5.45745500 | -4.09824300 | -1.99057900 |
| H | 1.62028500  | -4.17921600 | 0.06302600  | H | -3.53677300 | -5.64373900 | -1.63769000 |
| H | 2.34209100  | -4.17618000 | -1.58018400 | H | -1.33097200 | -4.76526300 | -0.91097700 |
| C | -2.12368000 | 0.59236000  | -0.47109700 | H | -0.99060800 | -2.37732300 | -0.49231400 |
| C | -2.45148900 | 2.07994300  | -0.75143200 | H | -5.01357700 | 0.80813100  | -1.38113900 |
| C | -3.64983600 | 2.65616200  | -0.29703100 | N | -5.15855400 | -1.30098200 | -1.59543300 |
| C | -1.50695400 | 2.93102800  | -1.34968200 | C | -6.53616500 | -1.41444700 | -2.02492900 |
| C | -3.91036700 | 4.01537700  | -0.47579200 | H | -6.59757500 | -1.90774500 | -3.00216400 |
| H | -4.37318500 | 2.05226900  | 0.23481800  | H | -7.12649700 | -1.99278200 | -1.30387300 |
| C | -1.76647000 | 4.29164800  | -1.52672600 | H | -6.96860900 | -0.41514700 | -2.10974100 |
| H | -0.53794600 | 2.55973500  | -1.66562400 | C | -1.68738800 | 0.50830800  | 1.08116000  |
| C | -2.97409600 | 4.84139100  | -1.09779300 | C | -1.06279900 | -0.78969500 | 1.50610000  |
| H | -4.84660600 | 4.42784600  | -0.10937800 | H | -0.91670800 | 1.27508700  | 1.18506400  |
| H | -1.01403400 | 4.91765600  | -1.99925700 | H | -1.68711300 | -1.67024600 | 1.59041100  |
| H | -3.17741000 | 5.89993400  | -1.23462900 | C | -2.83280200 | 0.85792200  | 2.01844900  |
| C | -0.88784100 | 0.26674600  | -1.31939900 | C | -3.93381700 | 0.00501900  | 2.19413400  |
| O | 0.24233000  | 0.36022200  | -0.84564800 | C | -2.79702000 | 2.05899300  | 2.73896400  |
| O | -1.15949400 | -0.04987800 | -2.57204800 | C | -4.98052400 | 0.36069000  | 3.04581800  |
| C | -0.08907700 | -0.44312300 | -3.45507800 | H | -3.97586500 | -0.93709600 | 1.65804400  |
| H | 0.60741800  | 0.39006700  | -3.60800500 | C | -3.83908000 | 2.41410100  | 3.59675100  |
| H | -0.57750500 | -0.68869000 | -4.39745900 | H | -1.94820500 | 2.72603400  | 2.61303000  |

|   |             |             |            |   |            |             |            |
|---|-------------|-------------|------------|---|------------|-------------|------------|
| C | -4.93981000 | 1.56852300  | 3.74723300 | O | 0.27098800 | -3.31200100 | 1.89416500 |
| H | -5.82716500 | -0.31065900 | 3.16598400 | O | 1.67420400 | -2.17964600 | 3.25923100 |
| H | -3.79166600 | 3.35241200  | 4.14331100 | C | 2.28570700 | -3.42629000 | 3.61393000 |
| H | -5.75468200 | 1.84288300  | 4.41216400 | H | 2.98022900 | -3.19306900 | 4.42171100 |
| C | 0.23294500  | -0.89388200 | 1.89029100 | H | 1.53495800 | -4.14956900 | 3.94421700 |
| O | 1.07325700  | 0.13195800  | 1.95573200 | H | 2.82572900 | -3.82897000 | 2.75186900 |
| C | 0.70646300  | -2.25645000 | 2.32706400 |   |            |             |            |

### 11. B3-LYP/6-31+G(d) geometries for selected the optimized compounds and transition states

**1**

|    |             |             |             |          |             |             |             |
|----|-------------|-------------|-------------|----------|-------------|-------------|-------------|
| Rh | -0.00094800 | -0.00337200 | 1.19547800  | H        | -2.85032700 | 3.61566000  | -0.50096900 |
| Rh | -0.00155200 | 0.00362000  | -1.19545600 | H        | -3.99813100 | 2.27609100  | -0.56719800 |
| C  | -2.01322000 | 1.71250100  | 0.00818900  | H        | -3.48028300 | 2.91980400  | 1.02191100  |
| O  | -1.56713200 | 1.33186900  | 1.14022500  | H        | 3.62290000  | 2.83883700  | -0.48464700 |
| O  | -1.57027600 | 1.33665800  | -1.12730200 | H        | 2.28764200  | 3.98939300  | -0.58267000 |
| C  | -1.71260400 | -2.01275100 | -0.00804800 | H        | 2.90880400  | 3.48773800  | 1.02109800  |
| O  | -1.33692100 | -1.56963800 | 1.12742200  | H        | 4.03149200  | -2.21820500 | 0.48500000  |
| O  | -1.33460900 | -1.56446400 | -1.14010800 | H        | 2.90012200  | -3.56979500 | 0.58215600  |
| C  | 2.01168400  | -1.71141100 | -0.00813300 | H        | 3.43229700  | -2.97359800 | -1.02122900 |
| O  | 1.56565100  | -1.33920600 | 1.12733900  | <b>2</b> |             |             |             |
| O  | 1.56668100  | -1.32951100 | -1.14016900 | C        | -0.50034200 | 0.40006100  | 0.00023600  |
| C  | 1.71150200  | 2.01198700  | 0.00807500  | N        | -0.84788500 | 1.67125600  | 0.00049500  |
| O  | 1.33167200  | 1.57238900  | -1.12738300 | N        | -1.11688500 | 2.77695800  | 0.00103300  |
| O  | 1.33430700  | 1.56302500  | 1.14012500  | C        | 0.94236100  | 0.07702000  | 0.00007900  |
| C  | -2.68285500 | -3.17089000 | -0.00281400 | C        | 1.38804100  | -1.25757800 | 0.00079100  |
| C  | 3.16805100  | -2.68382300 | -0.00276000 | C        | 1.90328200  | 1.10662600  | -0.00076700 |
| C  | -3.16175500 | 2.69411800  | 0.00276300  | C        | 2.75394500  | -1.53957000 | 0.00065400  |
| C  | 2.69529100  | 3.15868800  | 0.00266100  | H        | 0.66536900  | -2.06203400 | 0.00140400  |
| H  | -2.20406100 | -4.04225200 | 0.45761800  | C        | 3.26405800  | 0.81210300  | -0.00086200 |
| H  | -3.55604800 | -2.91673200 | 0.60668600  | H        | 1.59360100  | 2.14820400  | -0.00141400 |
| H  | -2.99345300 | -3.41761300 | -1.01955400 | C        | 3.70038000  | -0.51436000 | -0.00014400 |



|                      |             |             |             |           |             |             |             |
|----------------------|-------------|-------------|-------------|-----------|-------------|-------------|-------------|
| H                    | 3.07610900  | -2.57758400 | 0.00122200  | H         | 2.32954100  | -1.95847000 | 0.89265300  |
| H                    | 3.98422600  | 1.62591700  | -0.00153400 | H         | 2.32765600  | -1.96042800 | -0.89063700 |
| H                    | 4.76221400  | -0.74368500 | -0.00021800 | H         | 3.48268100  | -0.94357800 | -0.00137600 |
| C                    | -1.62243500 | -0.55038600 | -0.00022400 | <b>14</b> |             |             |             |
| O                    | -1.52112400 | -1.76269400 | -0.00024100 | Rh        | 2.96485500  | 0.49330100  | 1.15497300  |
| O                    | -2.81567100 | 0.09726500  | -0.00059100 | Rh        | 1.31830400  | -0.30039700 | -0.48549900 |
| C                    | -3.97051400 | -0.75672100 | -0.00024600 | C         | 1.72803100  | -2.06243600 | 1.80739800  |
| H                    | -4.82810200 | -0.08323800 | 0.00442400  | O         | 2.56856200  | -1.21475200 | 2.25036900  |
| H                    | -3.98169300 | -1.38924300 | -0.89245300 | O         | 1.05180800  | -1.95489700 | 0.73048000  |
| H                    | -3.97663200 | -1.39557400 | 0.88742700  | C         | 4.01595100  | -1.16934100 | -0.96628500 |
| <b>N<sub>2</sub></b> |             |             |             | O         | 4.36327500  | -0.52869900 | 0.07665600  |
| N                    | 0.00000000  | 0.00000000  | 0.55256300  | O         | 2.83345500  | -1.24643200 | -1.44362700 |
| N                    | 0.00000000  | 0.00000000  | -0.55256300 | C         | 2.58671100  | 2.24803400  | -1.14333300 |
| <b>6</b>             |             |             |             | O         | 3.24380300  | 2.14689300  | -0.05665000 |
| C                    | -0.38936900 | 0.98617500  | 0.00000700  | O         | 1.70609900  | 1.43025400  | -1.56971900 |
| C                    | 0.15270100  | -0.33258800 | -0.00009000 | C         | 0.21057300  | 1.48715400  | 1.79861100  |
| C                    | -0.65979200 | -1.47490700 | -0.00005700 | O         | -0.12376800 | 0.78167700  | 0.70287500  |
| C                    | -2.03957100 | -1.28324000 | 0.00000300  | O         | 1.38563300  | 1.50088100  | 2.16498600  |
| C                    | -2.59800100 | 0.01415000  | 0.00004800  | C         | 5.09307000  | -1.93327300 | -1.70073300 |
| C                    | -1.78755200 | 1.14530000  | 0.00005400  | C         | 2.89715500  | 3.44176400  | -2.02073900 |
| C                    | 0.72658700  | 1.89109600  | 0.00003200  | C         | 1.52640500  | -3.32371800 | 2.61736400  |
| C                    | 1.86327200  | 1.12104000  | -0.00006100 | C         | -0.88141200 | 2.20836300  | 2.52307700  |
| H                    | -0.23595700 | -2.47575200 | -0.00005600 | H         | 5.21050600  | -2.91843100 | -1.23305500 |
| H                    | -2.69825700 | -2.14791500 | 0.00002600  | H         | 4.81400600  | -2.07788300 | -2.74666500 |
| H                    | -3.67916400 | 0.12677600  | 0.00009200  | H         | 6.04736700  | -1.40635900 | -1.62394800 |
| H                    | -2.22751200 | 2.13985100  | 0.00010700  | H         | 2.25913300  | -4.07223200 | 2.29114000  |
| H                    | 0.69108700  | 2.97240700  | 0.00005200  | H         | 1.69473300  | -3.12571100 | 3.67872000  |
| H                    | 2.90398400  | 1.41846000  | -0.00009300 | H         | 0.52629400  | -3.73041300 | 2.45176700  |
| N                    | 1.53174700  | -0.22385400 | -0.00019900 | H         | -1.40460900 | 2.89789900  | 1.85142600  |
| C                    | 2.46234300  | -1.33442000 | 0.00017000  | H         | -1.62979600 | 1.49370100  | 2.88349300  |

|   |             |             |             |           |             |             |             |
|---|-------------|-------------|-------------|-----------|-------------|-------------|-------------|
| H | -0.45136900 | 2.75432500  | 3.36330700  | C         | -2.10623400 | 1.39077200  | -1.79099100 |
| H | 2.05620200  | 3.66566200  | -2.68088900 | H         | -3.83587600 | 4.73151300  | -0.02513200 |
| H | 3.15142400  | 4.31006900  | -1.40742600 | H         | -5.12095400 | 4.18596600  | 2.03278500  |
| H | 3.76808900  | 3.20264100  | -2.64322500 | H         | -5.30373500 | 1.84361000  | 2.82775100  |
| C | -2.43217400 | -0.98415000 | -0.86050000 | H         | -4.21911900 | -0.00916100 | 1.59230100  |
| C | -3.56835600 | -1.83191500 | -0.42285500 | H         | -1.06679800 | 0.82478500  | 0.35889500  |
| C | -3.39139200 | -2.97510300 | 0.38564700  | H         | -1.46255800 | 1.19584800  | -2.63602900 |
| C | -4.88921900 | -1.50598200 | -0.79797500 | N         | -2.51035600 | 2.67920800  | -1.50000900 |
| C | -4.47801800 | -3.74841300 | 0.79633900  | C         | -2.16006000 | 3.86660200  | -2.25573100 |
| H | -2.38786300 | -3.25490800 | 0.68843500  | H         | -3.05641700 | 4.34723500  | -2.66606300 |
| C | -5.97734400 | -2.27863000 | -0.38803600 | H         | -1.62862300 | 4.59245900  | -1.62739600 |
| H | -5.06032000 | -0.63555300 | -1.42634200 | H         | -1.50777500 | 3.57709200  | -3.08215100 |
| C | -5.78041400 | -3.40679300 | 0.41457200  | <b>15</b> |             |             |             |
| H | -4.30691600 | -4.62230000 | 1.42167500  | C         | 0.73001700  | 0.72962700  | -0.00001900 |
| H | -6.98133300 | -2.00057200 | -0.70154200 | C         | -0.40576500 | -0.00664200 | -0.00009700 |
| H | -6.62590300 | -4.01017500 | 0.73598900  | H         | 0.60803100  | 1.81297200  | 0.00007300  |
| C | -1.26235400 | -1.52978600 | -1.39317500 | H         | -0.40603000 | -1.09090500 | -0.00018800 |
| O | -0.27151800 | -0.84133500 | -1.85712100 | C         | 2.10839200  | 0.24645900  | -0.00003300 |
| O | -1.19389300 | -2.89499900 | -1.47000700 | C         | 3.15304400  | 1.19282200  | 0.00011000  |
| C | -0.07991900 | -3.45235500 | -2.17073100 | C         | 2.44703000  | -1.12362100 | -0.00017400 |
| H | -0.26639500 | -4.52898500 | -2.18646800 | C         | 4.48884600  | 0.79045900  | 0.00011900  |
| H | -0.02466900 | -3.06682600 | -3.19418100 | H         | 2.90706900  | 2.25220000  | 0.00021800  |
| H | 0.86103100  | -3.24115100 | -1.65635700 | C         | 3.77987100  | -1.52500800 | -0.00016600 |
| C | -3.38444600 | 1.29379600  | 0.07132400  | H         | 1.66372200  | -1.87574300 | -0.00029100 |
| C | -3.29584500 | 2.65019100  | -0.36476100 | C         | 4.80626700  | -0.57057000 | -0.00001800 |
| C | -3.90885000 | 3.70535000  | 0.32586800  | H         | 5.27914300  | 1.53635600  | 0.00023300  |
| C | -4.62679900 | 3.39224800  | 1.47853900  | H         | 4.02331700  | -2.58422200 | -0.00027600 |
| C | -4.72896200 | 2.05820300  | 1.93038800  | H         | 5.84541400  | -0.88904100 | -0.00001100 |
| C | -4.11948300 | 1.01287800  | 1.24117800  | C         | -1.71786300 | 0.65538300  | -0.00003800 |
| C | -2.60745700 | 0.48220900  | -0.86329600 | O         | -1.90040200 | 1.86383400  | 0.00004500  |

|                           |             |             |             |   |             |             |             |
|---------------------------|-------------|-------------|-------------|---|-------------|-------------|-------------|
| C                         | -2.92577500 | -0.31573800 | -0.00012200 | C | -1.44268000 | -1.77285600 | 3.89158100  |
| O                         | -2.80644600 | -1.52723600 | -0.00034100 | H | -5.97028900 | -3.52706900 | -1.02506700 |
| O                         | -4.09017400 | 0.33417700  | 0.00026900  | H | -4.98662500 | -4.77788100 | -0.22471000 |
| C                         | -5.27246900 | -0.48925400 | 0.00033700  | H | -5.94901700 | -3.61120500 | 0.74157200  |
| H                         | -6.10824200 | 0.21019000  | 0.00087900  | H | -0.55695600 | -1.18531200 | 4.16286100  |
| H                         | -5.29319500 | -1.12040700 | -0.89223200 | H | -2.28026500 | -1.44056100 | 4.50966600  |
| H                         | -5.29261500 | -1.12111500 | 0.89241600  | H | -1.22164600 | -2.82744800 | 4.07286100  |
| <b>CH<sub>3</sub>COOH</b> |             |             |             | H | -2.04920700 | 0.61251900  | -4.41540100 |
| C                         | 1.39787400  | -0.11940000 | -0.00000300 | H | -2.50090700 | -1.06249100 | -4.78489500 |
| H                         | 1.68083000  | -0.70461100 | -0.88172900 | H | -3.75864600 | 0.14492000  | -4.34888800 |
| H                         | 1.68105100  | -0.70173700 | 0.88357500  | C | 2.53479100  | -0.80125500 | 0.60923300  |
| H                         | 1.92539600  | 0.83512300  | -0.00152400 | C | 2.35847500  | 0.37015800  | 1.47844100  |
| C                         | -0.08899000 | 0.12534400  | -0.00005700 | C | 1.09314000  | 0.84230100  | 1.91340700  |
| O                         | -0.63590900 | 1.20794700  | -0.00008100 | C | 3.49116400  | 1.06102800  | 1.98169300  |
| O                         | -0.78953900 | -1.04038600 | 0.00006400  | C | 0.97799100  | 1.90707200  | 2.80810000  |
| H                         | -1.73699900 | -0.80493100 | 0.00017500  | H | 0.19844700  | 0.36342500  | 1.54162700  |
| <b>16</b>                 |             |             |             | C | 3.36964500  | 2.13256300  | 2.86664100  |
| Rh                        | -1.37303300 | -1.95733800 | -0.42809700 | H | 4.48162500  | 0.73897100  | 1.67626900  |
| Rh                        | -2.95156400 | -0.17006000 | 0.16525000  | C | 2.11113900  | 2.56620900  | 3.29778600  |
| C                         | -1.73660100 | -1.54183100 | 2.42734700  | H | -0.01434300 | 2.22150700  | 3.12697200  |
| O                         | -1.16702800 | -2.31667900 | 1.59428400  | H | 4.26889500  | 2.63079300  | 3.22395800  |
| O                         | -2.51479600 | -0.56776200 | 2.14196300  | H | 2.01606500  | 3.39555300  | 3.99427400  |
| C                         | -4.16937500 | -2.78989000 | -0.14005200 | C | 1.51289600  | -1.37258300 | -0.13746600 |
| O                         | -3.03540100 | -3.21409400 | -0.50139400 | O | 0.35714400  | -0.84138100 | -0.40077100 |
| O                         | -4.40943100 | -1.58909100 | 0.22589400  | O | 1.82795900  | -2.59878200 | -0.69101000 |
| C                         | -2.56046700 | -0.54455500 | -2.69565500 | C | 0.92098700  | -3.19273200 | -1.58972000 |
| O                         | -1.71305100 | -1.44456700 | -2.40920500 | H | -0.01977700 | -3.50990900 | -1.07331900 |
| O                         | -3.26758000 | 0.11753500  | -1.85876800 | H | 1.39801200  | -4.11202500 | -1.93817500 |
| C                         | -5.33868900 | -3.74678000 | -0.15602000 | H | 0.67153800  | -2.54641000 | -2.43547100 |
| C                         | -2.73949200 | -0.20030800 | -4.15780700 | C | 4.78798300  | -1.32539500 | -0.63373600 |

|   |             |             |             |                    |             |             |             |
|---|-------------|-------------|-------------|--------------------|-------------|-------------|-------------|
| C | 5.97354700  | -2.03512800 | -0.28806400 | C                  | 0.97231600  | 5.85039600  | -0.84175200 |
| C | 7.05829700  | -2.15112400 | -1.16813100 | C                  | 2.59374800  | 4.05520600  | -0.59373900 |
| C | 6.94567100  | -1.53813400 | -2.41526500 | C                  | 2.00827700  | 6.74869700  | -1.06980800 |
| C | 5.78010300  | -0.82711400 | -2.77674000 | H                  | -0.05463000 | 6.20334400  | -0.85906400 |
| C | 4.70516300  | -0.71742400 | -1.89812900 | C                  | 3.62975500  | 4.95989000  | -0.81848000 |
| C | 3.88788900  | -1.40690600 | 0.49388200  | H                  | 2.81597800  | 3.01113100  | -0.39032400 |
| C | 4.55443200  | -2.14292700 | 1.44597800  | C                  | 3.33978800  | 6.30622000  | -1.05848300 |
| H | 7.95726100  | -2.69843000 | -0.89555600 | H                  | 1.78515500  | 7.79531700  | -1.25857300 |
| H | 7.76896400  | -1.61073900 | -3.12171700 | H                  | 4.65973100  | 4.61489400  | -0.80430600 |
| H | 5.72412300  | -0.36233500 | -3.75826800 | H                  | 4.14617500  | 7.01289900  | -1.23681300 |
| H | 3.80678400  | -0.17422700 | -2.18226300 | H                  | 0.55723000  | 2.46387000  | -0.27962600 |
| H | 4.22635300  | -2.43355600 | 2.43605500  |                    |             |             |             |
| N | 5.80967200  | -2.52456700 | 0.99361700  | <b>17-ts-threo</b> |             |             |             |
| C | 6.77240100  | -3.32515100 | 1.72003000  | Rh                 | 2.08263900  | -1.27999600 | -0.90703200 |
| H | 6.95506900  | -4.28306000 | 1.21551800  | Rh                 | 3.02123200  | 0.05543600  | 0.89558200  |
| H | 7.72805100  | -2.79511600 | 1.82081500  | C                  | 2.99493700  | 1.34603900  | -1.71894800 |
| H | 6.38252500  | -3.52852700 | 2.72039500  | O                  | 2.59618800  | 0.23520400  | -2.20812400 |
| C | 0.21661500  | 3.49424600  | -0.36508400 | O                  | 3.19218600  | 1.58718400  | -0.48475200 |
| C | -1.12545100 | 3.71386600  | -0.22495400 | C                  | 4.93857100  | -1.60176500 | -0.53148900 |
| H | -1.57183400 | 4.70061600  | -0.26810300 | O                  | 3.92374700  | -2.10742800 | -1.12222900 |
| C | -2.02020900 | 2.61647000  | 0.00613700  | O                  | 4.88639500  | -0.63793700 | 0.28829700  |
| O | -1.64073200 | 1.42518700  | 0.08418700  | C                  | 2.09204200  | -2.56397900 | 1.70620900  |
| C | -3.50483700 | 2.96572800  | 0.16723300  | O                  | 1.61983000  | -2.69995100 | 0.52397200  |
| O | -3.96734000 | 4.07168700  | -0.00515800 | O                  | 2.79825300  | -1.59240300 | 2.11857900  |
| O | -4.22338600 | 1.88842700  | 0.53753900  | C                  | 6.28402500  | -2.22452000 | -0.81731200 |
| C | -5.65420600 | 2.06601600  | 0.69036300  | C                  | 1.76198100  | -3.64844900 | 2.70590500  |
| H | -6.02987600 | 1.08398000  | 0.97314800  | C                  | 3.25861200  | 2.47876400  | -2.68341500 |
| H | -5.84700500 | 2.80682200  | 1.46913000  | H                  | 6.49366200  | -2.97990600 | -0.05011100 |
| H | -6.08303500 | 2.39522300  | -0.25833500 | H                  | 6.28441000  | -2.71288700 | -1.79425700 |
| C | 1.24819100  | 4.48462100  | -0.60109800 | H                  | 7.06804400  | -1.46490200 | -0.76513700 |
|   |             |             |             | H                  | 2.62188400  | 3.33032900  | -2.42109400 |

|   |             |             |             |   |             |             |             |
|---|-------------|-------------|-------------|---|-------------|-------------|-------------|
| H | 4.29997800  | 2.80451500  | -2.58773500 | C | -3.42667700 | -0.44958600 | -0.91549700 |
| H | 3.06155000  | 2.16724700  | -3.71089300 | C | -4.58746300 | -0.08604000 | -1.57992100 |
| H | 2.57555000  | -3.75649000 | 3.42751400  | H | -6.80623400 | -3.33668800 | -0.27647300 |
| H | 0.86031400  | -3.35420100 | 3.25699700  | H | -5.50772400 | -4.88598100 | 1.17385600  |
| H | 1.56717600  | -4.59681800 | 2.19978700  | H | -3.13112100 | -4.41565200 | 1.71115100  |
| C | -2.12141700 | 0.23842400  | -0.93417300 | H | -2.00375600 | -2.40833100 | 0.83377000  |
| C | -2.00795500 | 1.57289900  | -1.58460100 | H | -4.76530100 | 0.75165700  | -2.23785700 |
| C | -0.89197600 | 1.94396100  | -2.36758400 | N | -5.59724800 | -0.99717800 | -1.35911100 |
| C | -3.03660500 | 2.53367600  | -1.45262500 | C | -6.94500000 | -0.91654300 | -1.88600400 |
| C | -0.82066100 | 3.18988600  | -2.99276500 | H | -7.18337400 | -1.80378700 | -2.48518300 |
| H | -0.06590000 | 1.25484400  | -2.49844900 | H | -7.68005800 | -0.82951600 | -1.07620500 |
| C | -2.95919900 | 3.78116900  | -2.07175800 | H | -7.02373100 | -0.03398700 | -2.52479900 |
| H | -3.89927100 | 2.30970100  | -0.83802900 | C | -1.64671400 | 0.95557400  | 1.32240000  |
| C | -1.85208900 | 4.12102600  | -2.85416400 | C | -0.66436700 | 1.98369100  | 1.24398700  |
| H | 0.05133100  | 3.43004000  | -3.59668200 | H | -0.96861200 | 3.01852300  | 1.14308100  |
| H | -3.77071200 | 4.49285600  | -1.93544900 | C | 0.69212500  | 1.77630000  | 1.41755900  |
| H | -1.79259600 | 5.09136100  | -3.33992900 | O | 1.22849500  | 0.61411900  | 1.64629300  |
| C | -0.97379400 | -0.67173300 | -1.15370000 | C | 1.56764800  | 3.01049000  | 1.49538300  |
| O | 0.19558500  | -0.39354000 | -0.82294100 | O | 1.26462800  | 4.11867900  | 1.09511000  |
| O | -1.30010800 | -1.80951300 | -1.78204800 | O | 2.74112800  | 2.73973600  | 2.11554600  |
| C | -0.32465400 | -2.83208800 | -2.03791500 | C | 3.66763500  | 3.83482800  | 2.20311400  |
| H | 0.52022900  | -2.42851500 | -2.61398800 | H | 4.52742700  | 3.44427600  | 2.74883900  |
| H | -0.84512600 | -3.56916600 | -2.65102100 | H | 3.96082700  | 4.15800200  | 1.20060300  |
| H | 0.01704200  | -3.28725400 | -1.10648800 | H | 3.21662400  | 4.67336500  | 2.74073900  |
| C | -3.75645900 | -1.69496300 | -0.23714100 | C | -2.99371700 | 1.25469500  | 1.82464300  |
| C | -5.11364800 | -1.99565200 | -0.53563000 | C | -3.55197400 | 2.55337600  | 1.79761400  |
| C | -5.76606200 | -3.13090900 | -0.03795700 | C | -3.75372400 | 0.23386100  | 2.43367700  |
| C | -5.03363700 | -3.99367900 | 0.77351200  | C | -4.81224500 | 2.80738200  | 2.33665200  |
| C | -3.68240900 | -3.72485200 | 1.07807000  | H | -2.99455700 | 3.37504300  | 1.36186300  |
| C | -3.04464700 | -2.59147300 | 0.58044200  | C | -5.01054000 | 0.48913700  | 2.98131000  |

|                 |             |             |             |   |             |             |             |
|-----------------|-------------|-------------|-------------|---|-------------|-------------|-------------|
| H               | -3.34406600 | -0.76896300 | 2.49048000  | C | -2.19497300 | 0.37290400  | -0.63066400 |
| C               | -5.55088700 | 1.77755600  | 2.93069400  | C | -2.73420400 | 1.58433000  | -1.41572200 |
| H               | -5.21430700 | 3.81730100  | 2.30469100  | C | -1.89337800 | 2.35544400  | -2.23582500 |
| H               | -5.56555700 | -0.31941800 | 3.45049200  | C | -4.05258600 | 2.03417100  | -1.23473200 |
| H               | -6.52956900 | 1.98067000  | 3.35845300  | C | -2.35754800 | 3.50490900  | -2.87854300 |
| H               | -1.27288400 | -0.03404200 | 1.56341900  | H | -0.85490600 | 2.07319600  | -2.37501200 |
| <b>18-threo</b> |             |             |             | C | -4.52317700 | 3.18192100  | -1.87962700 |
| Rh              | 2.05464600  | -1.13573600 | -1.00177800 | H | -4.71767500 | 1.49964400  | -0.56714500 |
| Rh              | 2.83452400  | 0.13194700  | 0.93784100  | C | -3.68021600 | 3.92109900  | -2.71149500 |
| C               | 2.77189500  | 1.62509400  | -1.58412000 | H | -1.67765900 | 4.07832700  | -3.50341600 |
| O               | 2.32204600  | 0.56615000  | -2.14656500 | H | -5.54977800 | 3.50113100  | -1.71660200 |
| O               | 3.08953800  | 1.73232400  | -0.35929500 | H | -4.04380100 | 4.81479200  | -3.21211900 |
| C               | 4.91043100  | -1.30149600 | -0.57697100 | C | -0.96085100 | -0.23766800 | -1.33831200 |
| O               | 3.96227500  | -1.69609800 | -1.34392600 | O | 0.04519600  | -0.57720800 | -0.71310100 |
| O               | 4.75557400  | -0.54622500 | 0.42160400  | O | -1.15104800 | -0.45496800 | -2.63338900 |
| C               | 2.12486000  | -2.62453500 | 1.49668000  | C | -0.17676700 | -1.19817500 | -3.39549500 |
| O               | 1.81849200  | -2.74422000 | 0.26001800  | H | 0.73202200  | -0.60702300 | -3.52488600 |
| O               | 2.56005900  | -1.57439000 | 2.06190400  | H | -0.65414500 | -1.37812400 | -4.35906700 |
| C               | 6.29570700  | -1.81114600 | -0.89819000 | H | 0.03751800  | -2.15311000 | -2.90439700 |
| C               | 1.97931800  | -3.85721500 | 2.36109400  | C | -2.96186900 | -2.10093700 | 0.06409200  |
| C               | 2.92549900  | 2.86183300  | -2.43735000 | C | -4.06406700 | -2.92843800 | -0.30046600 |
| H               | 6.41761200  | -2.80888800 | -0.45920100 | C | -4.23044600 | -4.23358100 | 0.18028700  |
| H               | 6.42955200  | -1.90082600 | -1.97935000 | C | -3.25055400 | -4.73726900 | 1.02986200  |
| H               | 7.05101700  | -1.14887200 | -0.46972800 | C | -2.13094600 | -3.95477400 | 1.37989400  |
| H               | 2.28088000  | 3.65086400  | -2.03370800 | C | -1.97631500 | -2.65475900 | 0.90794000  |
| H               | 3.95856900  | 3.22082500  | -2.37953500 | C | -3.15630600 | -0.82392300 | -0.60324800 |
| H               | 2.66334800  | 2.65541100  | -3.47680700 | C | -4.30531900 | -0.96908900 | -1.35201700 |
| H               | 1.51973800  | -3.59045100 | 3.31713100  | H | -5.09033100 | -4.83517600 | -0.10194800 |
| H               | 1.38943400  | -4.62033700 | 1.84957000  | H | -3.34532300 | -5.74686200 | 1.42076700  |
| H               | 2.97616800  | -4.26126200 | 2.57444400  | H | -1.37036800 | -4.37667600 | 2.03128000  |

|   |             |             |             |                      |             |             |             |
|---|-------------|-------------|-------------|----------------------|-------------|-------------|-------------|
| H | -1.09295600 | -2.08940700 | 1.18213700  | H                    | -1.21945500 | -0.00873200 | 1.27679400  |
| H | -4.77170600 | -0.27463600 | -2.03431000 | <b>21-ts-erythro</b> |             |             |             |
| N | -4.86347600 | -2.21439200 | -1.17078300 | Rh                   | 2.28834900  | 0.51177700  | -1.32582300 |
| C | -6.11390300 | -2.67653700 | -1.74173700 | Rh                   | 3.05125600  | -0.03226200 | 0.93851100  |
| H | -5.96613100 | -3.61720200 | -2.28483200 | C                    | 2.58364800  | 2.78988800  | 0.45844800  |
| H | -6.87044100 | -2.83315500 | -0.96273100 | O                    | 2.28745000  | 2.49010000  | -0.74940100 |
| H | -6.48340100 | -1.92437600 | -2.44247200 | O                    | 2.93597800  | 1.97427200  | 1.36740600  |
| C | -1.74225800 | 0.84192400  | 0.84117700  | C                    | 5.16966100  | 0.52608600  | -0.98404600 |
| C | -0.75609300 | 1.98300000  | 0.80622400  | O                    | 4.23541900  | 0.67174900  | -1.84391300 |
| H | -1.09943200 | 2.96670600  | 0.50773300  | O                    | 4.98249800  | 0.24957800  | 0.23631200  |
| C | 0.53043600  | 1.89265800  | 1.23018600  | C                    | 2.82427600  | -2.32717500 | -0.85205000 |
| O | 1.09350700  | 0.78487400  | 1.69658800  | O                    | 2.40143100  | -1.51701700 | -1.74287100 |
| C | 1.32426200  | 3.18106800  | 1.27038400  | O                    | 3.16857300  | -2.01058100 | 0.33233600  |
| O | 1.06785900  | 4.18908800  | 0.63226600  | C                    | 6.58743300  | 0.66985800  | -1.48273500 |
| O | 2.35787000  | 3.10159600  | 2.13510700  | C                    | 2.89133300  | -3.79103500 | -1.21708700 |
| C | 3.19801700  | 4.26201800  | 2.21355400  | C                    | 2.48686700  | 4.24733100  | 0.84458500  |
| H | 3.94686800  | 4.02697600  | 2.97133400  | H                    | 7.25639900  | 0.91468300  | -0.65499000 |
| H | 3.67460100  | 4.44809500  | 1.24675100  | H                    | 6.90870300  | -0.28322400 | -1.92034200 |
| H | 2.61534800  | 5.14002500  | 2.50656900  | H                    | 6.64164700  | 1.43405400  | -2.26220100 |
| C | -2.92008400 | 1.16500800  | 1.77025800  | H                    | 2.73532800  | 4.88595900  | -0.00704400 |
| C | -3.49762000 | 2.44373800  | 1.84698700  | H                    | 1.45343900  | 4.46017200  | 1.14305400  |
| C | -3.41550200 | 0.17377500  | 2.63317000  | H                    | 3.14322500  | 4.46027200  | 1.69129500  |
| C | -4.54608900 | 2.71274500  | 2.73104500  | H                    | 2.80831500  | -3.92586900 | -2.29739300 |
| H | -3.12884500 | 3.24747500  | 1.21908500  | H                    | 3.82628300  | -4.22635900 | -0.85179300 |
| C | -4.46225400 | 0.43745200  | 3.52070300  | H                    | 2.06362600  | -4.30985200 | -0.71875100 |
| H | -2.97348400 | -0.81759300 | 2.61828600  | C                    | -2.16389100 | 0.81768300  | -0.70682800 |
| C | -5.03764200 | 1.70960400  | 3.57066800  | C                    | -2.20322100 | 2.26186000  | -0.36250500 |
| H | -4.97060600 | 3.71333300  | 2.76851800  | C                    | -3.33946100 | 2.82452100  | 0.26827100  |
| H | -4.81979800 | -0.35179100 | 4.17791100  | C                    | -1.15169300 | 3.15684700  | -0.67878700 |
| H | -5.84842500 | 1.92064700  | 4.26374600  | C                    | -3.42859700 | 4.18922400  | 0.54579900  |

|   |             |             |             |                   |             |             |             |
|---|-------------|-------------|-------------|-------------------|-------------|-------------|-------------|
| H | -4.16209100 | 2.18281200  | 0.55457800  | H                 | -7.03189400 | -0.30574800 | -3.39266900 |
| C | -1.24765600 | 4.52098300  | -0.40579600 | H                 | -7.61986500 | -0.25149400 | -1.71012000 |
| H | -0.24613200 | 2.79195400  | -1.14534700 | C                 | -1.62759200 | 0.03466700  | 1.64177800  |
| C | -2.38621300 | 5.05466600  | 0.20684000  | C                 | -0.91802300 | -1.18864800 | 1.66630800  |
| H | -4.32106500 | 4.57268500  | 1.03565300  | H                 | -1.01489700 | 0.92943400  | 1.67802700  |
| H | -0.42445700 | 5.17332000  | -0.68803900 | H                 | -1.45465700 | -2.12589400 | 1.76627800  |
| H | -2.45781700 | 6.11922500  | 0.41454200  | C                 | -2.95881300 | 0.14724000  | 2.23736200  |
| C | -0.94196800 | 0.32687300  | -1.36580900 | C                 | -3.92761200 | -0.87794300 | 2.16819900  |
| O | 0.21323100  | 0.54655900  | -0.94344400 | C                 | -3.26798000 | 1.30057700  | 2.99078200  |
| O | -1.19615100 | -0.34599100 | -2.49667800 | C                 | -5.14947800 | -0.75045500 | 2.82546500  |
| C | -0.13994100 | -0.88238200 | -3.30674900 | H                 | -3.72725900 | -1.77212800 | 1.58779200  |
| H | 0.52849700  | -0.08234200 | -3.64396200 | C                 | -4.48595500 | 1.41931400  | 3.66132900  |
| H | -0.64627100 | -1.32134800 | -4.16744300 | H                 | -2.53080200 | 2.09463500  | 3.06542600  |
| H | 0.43067600  | -1.63654400 | -2.76648700 | C                 | -5.43452800 | 0.39560100  | 3.57893700  |
| C | -3.67216400 | -1.27325800 | -1.24623600 | H                 | -5.88188700 | -1.55084400 | 2.75384000  |
| C | -4.99735000 | -1.42300100 | -1.73935400 | H                 | -4.69201600 | 2.30993900  | 4.24998200  |
| C | -5.58930500 | -2.67306700 | -1.95785300 | H                 | -6.38475300 | 0.48562900  | 4.09951700  |
| C | -4.82466200 | -3.80500000 | -1.68387700 | C                 | 0.46651700  | -1.25298100 | 1.78147000  |
| C | -3.50329000 | -3.68499200 | -1.20522400 | O                 | 1.23675700  | -0.20930400 | 1.82625200  |
| C | -2.92472900 | -2.43627300 | -0.98875400 | C                 | 1.04054100  | -2.62946500 | 2.04949800  |
| C | -3.41067100 | 0.15332500  | -1.12770300 | O                 | 0.61836400  | -3.66178800 | 1.55399600  |
| C | -4.57529500 | 0.76838800  | -1.56403500 | O                 | 2.04526800  | -2.58031900 | 2.94085500  |
| H | -6.60707100 | -2.76187100 | -2.32872600 | C                 | 2.69033300  | -3.82987500 | 3.23522400  |
| H | -5.25128300 | -4.79188000 | -1.84335700 | H                 | 3.43064300  | -3.59902800 | 4.00200600  |
| H | -2.92523900 | -4.58261100 | -1.00115300 | H                 | 1.96401400  | -4.55880700 | 3.60527900  |
| H | -1.90618200 | -2.37215800 | -0.62041800 | H                 | 3.17653800  | -4.21800600 | 2.33627100  |
| H | -4.79026200 | 1.82117100  | -1.67656400 |                   |             |             |             |
| N | -5.52441800 | -0.15813800 | -1.93056800 | <b>22-erythro</b> |             |             |             |
| C | -6.86248100 | 0.13590300  | -2.40325000 | Rh                | 2.27781700  | 0.45240700  | -1.35858000 |
| H | -6.98152600 | 1.21907000  | -2.48024400 | Rh                | 2.90064000  | 0.01142100  | 0.96245600  |
|   |             |             |             | C                 | 2.63896500  | 2.82357600  | 0.28474000  |



|   |             |             |             |   |             |             |             |
|---|-------------|-------------|-------------|---|-------------|-------------|-------------|
| O | 2.35208800  | 2.45906300  | -0.90956700 | H | -1.29951300 | 5.00673800  | -2.09638300 |
| O | 2.93789000  | 2.05590300  | 1.24949500  | H | -3.33633100 | 5.96440600  | -1.01439800 |
| C | 5.12959200  | 0.28684800  | -0.94633300 | C | -0.91240600 | 0.35911700  | -1.32633800 |
| O | 4.23375900  | 0.45982400  | -1.84657200 | O | 0.23163700  | 0.51740700  | -0.90218500 |
| O | 4.88668900  | 0.07880000  | 0.27413900  | O | -1.21247500 | 0.01798400  | -2.56929200 |
| C | 2.50028500  | -2.37160100 | -0.69107300 | C | -0.15554400 | -0.22479100 | -3.52284300 |
| O | 2.20812000  | -1.59010500 | -1.66199300 | H | 0.46526500  | 0.67101000  | -3.63634200 |
| O | 2.84043100  | -2.00409800 | 0.47726200  | H | -0.66960000 | -0.43800200 | -4.45986800 |
| C | 6.56929100  | 0.36787000  | -1.39588900 | H | 0.44951900  | -1.07712700 | -3.20897900 |
| C | 2.41319700  | -3.85839800 | -0.93979200 | C | -3.26497500 | -1.71107200 | -1.06433400 |
| C | 2.59708100  | 4.30885200  | 0.56409500  | C | -4.54748600 | -2.09105600 | -1.55605900 |
| H | 7.19483800  | -0.27540200 | -0.77237300 | C | -4.89079400 | -3.41889500 | -1.84254400 |
| H | 6.66108400  | 0.09253300  | -2.44911700 | C | -3.91451700 | -4.39248800 | -1.65272000 |
| H | 6.91832200  | 1.40101700  | -1.27789400 | C | -2.62750900 | -4.04291700 | -1.19492300 |
| H | 2.98906000  | 4.86774800  | -0.29017800 | C | -2.29619700 | -2.72256100 | -0.90558000 |
| H | 1.55310600  | 4.60972600  | 0.71381100  | C | -3.28696700 | -0.26750800 | -0.89344900 |
| H | 3.16160200  | 4.54282600  | 1.46905500  | C | -4.53704000 | 0.13291700  | -1.31372600 |
| H | 3.33623400  | -4.34320500 | -0.60621400 | H | -5.88099500 | -3.68164200 | -2.20538600 |
| H | 1.59116600  | -4.26430800 | -0.33876500 | H | -4.14656700 | -5.43335400 | -1.86261000 |
| H | 2.23977500  | -4.06846000 | -1.99692600 | H | -1.88087100 | -4.81948600 | -1.05348300 |
| C | -2.14564100 | 0.64120100  | -0.43790000 | H | -1.30048100 | -2.49239100 | -0.54258500 |
| C | -2.48520300 | 2.14910300  | -0.63553300 | H | -4.95323100 | 1.12551400  | -1.39052900 |
| C | -3.61874800 | 2.71182900  | -0.01993800 | N | -5.30496700 | -0.94545700 | -1.69688000 |
| C | -1.66072100 | 3.01423000  | -1.37437200 | C | -6.67472100 | -0.88984700 | -2.16773600 |
| C | -3.92334700 | 4.06796800  | -0.15667500 | H | -6.75881300 | -1.31471100 | -3.17542400 |
| H | -4.27035200 | 2.09266000  | 0.58313900  | H | -7.34506700 | -1.44067900 | -1.49637400 |
| C | -1.96324100 | 4.37262500  | -1.51396600 | H | -6.99624500 | 0.15366900  | -2.20198100 |
| H | -0.75057900 | 2.65571900  | -1.84318300 | C | -1.66624400 | 0.45549400  | 1.09578100  |
| C | -3.09972300 | 4.90881500  | -0.90861600 | C | -1.02495400 | -0.86427600 | 1.44740200  |
| H | -4.80672300 | 4.46486700  | 0.33755600  | H | -0.89215900 | 1.21558800  | 1.22068800  |

|   |             |             |            |
|---|-------------|-------------|------------|
| H | -1.65613000 | -1.73936200 | 1.54809400 |
| C | -2.74769000 | 0.73268700  | 2.13884500 |
| C | -3.86522600 | -0.10265700 | 2.30739400 |
| C | -2.59017900 | 1.81319800  | 3.02038300 |
| C | -4.80888800 | 0.15604800  | 3.30492200 |
| H | -4.00134100 | -0.96302700 | 1.65948400 |
| C | -3.52782300 | 2.07096800  | 4.02407500 |
| H | -1.72092200 | 2.45843900  | 2.91767600 |
| C | -4.64714800 | 1.24619700  | 4.16618000 |
| H | -5.66672600 | -0.50327700 | 3.41566800 |
| H | -3.38128700 | 2.91444100  | 4.69456400 |
| H | -5.37880500 | 1.44264800  | 4.94604000 |
| C | 0.27330000  | -0.98145700 | 1.83344200 |
| O | 1.12535300  | 0.03427400  | 1.89527700 |
| C | 0.71706400  | -2.33815300 | 2.33151400 |
| O | 0.22307900  | -3.40359900 | 1.99547300 |
| O | 1.72034000  | -2.23983500 | 3.22510100 |
| C | 2.23529100  | -3.48082100 | 3.72871300 |
| H | 3.00912700  | -3.20327900 | 4.44584800 |
| H | 1.44394200  | -4.05574700 | 4.21829300 |
| H | 2.66180100  | -4.07138800 | 2.91287000 |
